# Supplementary material for: Palladium-catalyzed C–H dimethylamination of 1-chloromethyl naphthalenes with N,N-dimethylformamide as the dimethyl amino source
Source: Royal Society of Chemistry journal article supplement (doi:10.1039/d3ob00600j), 2023-01-01

## Supporting Information

### Palladium-Catalyzed C-H Dimethylamination of 1-Chloromethyl naphthalenes with *N,N*-Dimethylformamide as Dimethyl Amino Source

Sheng Zhang,<sup>\*,†</sup> Ziyang Wang,<sup>†</sup> Ya Gao,<sup>†</sup> Masahiko Yamaguchi,<sup>†</sup> and Ming Bao<sup>\*,†</sup>

<sup>†</sup>State Key Laboratory of Fine Chemicals, Dalian University of Technology, Dalian 116023, China

\*Email: shengzhang@dlut.edu.cn; mingbao@dlut.edu.cn

### Table of Contents

|                                                                                                            |     |
|------------------------------------------------------------------------------------------------------------|-----|
| 1. General Information .....                                                                               | S2  |
| 2. Synthesis of Starting Materials .....                                                                   | S2  |
| 3. Optimization of Reaction Conditions (Method A) .....                                                    | S7  |
| 4. Optimization of Reaction Conditions (Method B) .....                                                    | S9  |
| 5. General Procedure for Remote Dimethylamination .....                                                    | S9  |
| 6. Gram-Scale Reaction and Derivatization .....                                                            | S10 |
| 7. Control Experiments .....                                                                               | S11 |
| 8. Plausible Mechanism about DMF and Base .....                                                            | S12 |
| 9. Characterization Data for All Compounds .....                                                           | S14 |
| 10. References .....                                                                                       | S22 |
| 11. Copies of <sup>1</sup> H, <sup>13</sup> C, <sup>19</sup> F, <sup>31</sup> P NMR and HMBC Spectra ..... | S23 |

## 1. General Information

Unless otherwise noted, all reactions were carried out in oven-dried 25-mL Schlenk tubes under a nitrogen atmosphere and IKA plate was used as the heat source. Solvents were purified by standard techniques without special instructions.  $^1\text{H}$  and  $^{13}\text{C}$  NMR spectra were recorded on a Bruker AvanceII-400 spectrometer (400 MHz for  $^1\text{H}$ , 100 MHz for  $^{13}\text{C}$ , 376 MHz for  $^{19}\text{F}$ , 162 MHz for  $^{31}\text{P}$ ), Varian DLG400 spectrometer (400 MHz for  $^1\text{H}$ , 100 MHz for  $^{13}\text{C}$ ) or Bruker Avance NEO 600M NMR Spectroscopy (600 MHz for  $^1\text{H}$ , 150 MHz for  $^{13}\text{C}$ );  $\text{CDCl}_3$  and TMS were used as a solvent and an internal standard, respectively. The NMR yield was determined by  $^1\text{H}$  NMR using  $\text{CH}_2\text{Br}_2$  or 1,3,5-trimethoxybenzene as an internal standard. The chemical shifts are reported in ppm downfield ( $\delta$ ) from TMS, the coupling constants  $J$  are given in Hz. The peak patterns are indicated as follows: s, singlet; d, doublet; t, triplet; q, quartet; m, multiplet. IR spectra were recorded on a NEXUS FT-IR spectrometer. High resolution mass spectra were recorded on either a Q-TOF mass spectrometry or a GC-TOF mass spectrometry. TLC was carried out on  $\text{SiO}_2$  (silica gel 60 F254, Merck), and the spots were located with UV light and iodoplatinate reagent. Flash chromatography was carried out on  $\text{SiO}_2$  (silica gel 60, 200-300 mesh). Unless otherwise noted, starting materials are commercially available.

## 2. Synthesis of Starting Materials

### Representative procedure for synthesis of starting material **1p**<sup>[1]</sup>:

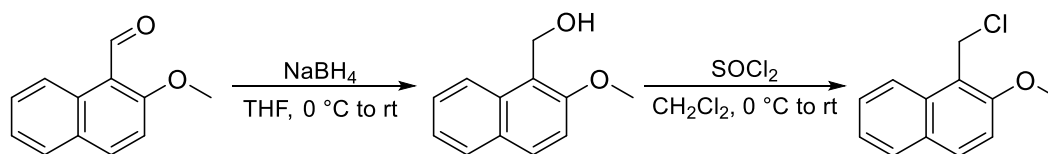

To a solution of 2-methoxy-1-naphthaldehyde (0.93g, 5 mmol) in THF (20 mL) at  $0\text{ }^\circ\text{C}$ ,  $\text{NaBH}_4$  (0.095 g, 2.5 mmol) was slowly added. The reaction mixture was slowly warmed to room temperature and stirred overnight. Then water (10 mL) was added slowly to quench the reaction. The product was extracted with ethyl ether (10 mL  $\times$  3), and the combined organic layers were washed with brine (10 mL  $\times$  3), dried over  $\text{Na}_2\text{SO}_4$ . The solvent was removed under reduced pressure, and the residue obtained was purified via silica gel chromatography (eluent: hexane/ethyl acetate = 10:1) to afford (2-methoxynaphthalen-1-yl)methanol as a yellow solid (0.87 g, 93% yield).

To a solution of the (2-methoxynaphthalen-1-yl)methanol (2 mmol) in  $\text{CH}_2\text{Cl}_2$  (10 mL) at  $0\text{ }^\circ\text{C}$ ,  $\text{SOCl}_2$  (2.0 equiv.) was slowly added. The reaction mixture was slowly warmed to room temperature and stirred overnight. After washed with the aqueous sodium bicarbonate, brine, the combined organic layers were dried over  $\text{Na}_2\text{SO}_4$ , filtrated, and then concentrated under vacuum to afford 1-(chloromethyl)-2-methoxynaphthalene (**1p**) (yellow solid, 0.40 g, 96% yield).  $^1\text{H}$  NMR (400 MHz,  $\text{CDCl}_3$ )  $\delta$  8.03 (dd,  $J$  = 8.6, 1.0 Hz, 1H), 7.85 (d,  $J$  = 9.1 Hz, 1H), 7.83–7.76 (m, 1H), 7.61–7.55 (m, 1H), 7.40–7.36 (m, 1H), 7.26 (d,  $J$  = 9.1 Hz, 1H), 5.18 (s, 2H), 4.00 (s, 3H).  $^{13}\text{C}$  NMR (101 MHz,  $\text{CDCl}_3$ )  $\delta$  155.2, 132.5, 131.1, 129.1, 128.7, 127.4, 123.8, 122.7, 117.9, 113.0, 77.4, 77.1, 76.8, 56.7, 37.3.

## Representative procedure for synthesis of starting materials **1a-1f**, **1i-1m**, **1r**<sup>[2]</sup> :

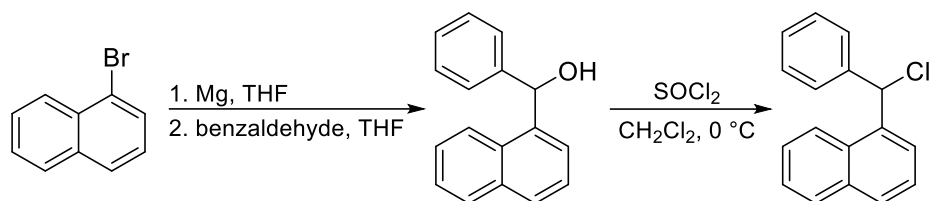

To an oven-dried 50-mL round-bottom flask containing benzaldehyde (1.06g, 10.0 mmol) in THF (10 mL), (naphthalen-1-yl)magnesium bromide in THF (20 mL) prepared from 1-bromonaphthalene (2.07g, 10.0 mmol) and magnesium powder (Mg, 0.26g, 11.0 mmol) was added dropwise at 0 °C under a N<sub>2</sub> atmosphere. The resulting mixture was stirred overnight at room temperature, and then the saturated NH<sub>4</sub>Cl aqueous solution (10 mL) was added to quench the reaction. And then the resulting mixture was extracted with ethyl ether (10 mL × 3). The combined organic layers were washed with brine (10 mL × 3), dried over Na<sub>2</sub>SO<sub>4</sub> and filtrated. The solvent was removed by evaporation under vacuum to afford a crude product. The crude product was purified by silica gel column chromatography (eluent: hexane/ethyl acetate = 10:1) to afford naphthalen-1-yl(phenyl)methanol (1.89 g, 75% yield) as a white solid.

To a solution of naphthalen-1-yl(phenyl)methanol (1.17 g, 5 mmol) in dichloromethane (CH<sub>2</sub>Cl<sub>2</sub>, 25 mL) at 0 °C, SOCl<sub>2</sub> (2 equiv.) was slowly added. The resulting mixture was stirred overnight at room temperature, and then the aqueous sodium bicarbonate (25 mL) was added to quench the reaction for neutralize excess of SOCl<sub>2</sub>. The resulting mixture was washed with dichloromethane (10 mL × 3), the combined organic layers were washed with brine (10 mL × 3) and dried over Na<sub>2</sub>SO<sub>4</sub>. The solvent was removed under reduced pressure to give 1-(chloro(phenyl)methyl)naphthalene (**1a**) as a yellowish solid (1.21 g, 96% yield), which was used without further purification in the amination reaction. <sup>1</sup>H NMR (400 MHz, CDCl<sub>3</sub>) δ 8.11–8.05 (m, 1H), 7.92–7.86 (m, 1H), 7.84 (d, *J* = 8.2 Hz, 1H), 7.60 (d, *J* = 7.2 Hz, 1H), 7.54–7.42 (m, 5H), 7.39–7.28 (m, 3H), 6.89 (s, 1H).

**1-(chloro(*p*-tolyl)methyl)naphthalene (**1b**)**<sup>[1]</sup>, yellowish solid (1.21 g, 90% yield). <sup>1</sup>H NMR (400 MHz, CDCl<sub>3</sub>) δ 8.10–8.03 (m, 1H), 7.91–7.85 (m, 1H), 7.83 (d, *J* = 8.1 Hz, 1H), 7.63 (d, *J* = 7.3 Hz, 1H), 7.54–7.42 (m, 3H), 7.35 (d, *J* = 8.1 Hz, 2H), 7.15 (d, *J* = 7.8 Hz, 2H), 6.87 (s, 1H), 2.34 (s, 3H).

**1-(chloro(*o*-tolyl)methyl)naphthalene (**1c**)**, yellowish solid (1.24 g, 92% yield). mp 58–60 °C. <sup>1</sup>H NMR (400 MHz, CDCl<sub>3</sub>) δ 8.00 (d, *J* = 8.2 Hz, 1H), 7.87 (dd, *J* = 7.7, 1.8 Hz, 1H), 7.56–7.45 (m, 4H), 7.41 (t, *J* = 7.7 Hz, 1H), 7.25–7.18 (m, 3H), 7.06 (s, 1H), 2.32 (s, 3H). <sup>13</sup>C NMR (101 MHz, CDCl<sub>3</sub>) δ 138.5, 135.7, 135.5, 133.9, 130.7, 130.6, 129.2, 129.0, 128.5, 128.3, 126.8, 126.5, 126.4, 125.9, 125.4, 123.1, 77.4, 77.1, 76.8, 58.7, 19.3. IR (KBr) 3052, 2956, 2924, 2853, 1742, 1666, 1510, 1488, 1383, 1461, 1261, 1091, 800, 779, 736 cm<sup>-1</sup>; HRMS (EI) calcd for C<sub>18</sub>H<sub>15</sub>Cl: 266.0862 [M]<sup>+</sup>; found: 266.0856.

**1-(chloro(3,4-dimethylphenyl)methyl)naphthalene (**1d**)**, yellowish solid (1.34 g, 92% yield). mp 62–64 °C. <sup>1</sup>H NMR (400 MHz, CDCl<sub>3</sub>) δ 8.12–8.04 (m, 1H), 7.91–7.85 (m, 1H), 7.82 (d, *J* = 8.2 Hz, 1H), 7.65 (d, *J* = 7.2 Hz, 1H), 7.53–7.43 (m, 3H), 7.24 (d, *J* = 2.1 Hz, 1H), 7.17 (dd, *J* =

7.8, 2.1 Hz, 1H), 7.10 (d,  $J = 7.8$  Hz, 1H), 6.85 (s, 1H), 2.24 (d,  $J = 2.7$  Hz, 6H).  $^{13}\text{C}$  NMR (101 MHz,  $\text{CDCl}_3$ )  $\delta$  138.0, 136.9, 136.7, 136.2, 133.9, 130.5, 129.8, 129.2, 129.1, 128.9, 126.8, 126.5, 125.8, 125.5, 125.3, 123.8, 77.4, 77.1, 76.8, 61.9, 19.9, 19.5. IR (KBr) 3048, 2922, 2853, 1733, 1645, 1600, 1508, 1454, 1383, 1258, 1061, 1020, 826, 781, 740  $\text{cm}^{-1}$ ; HRMS (EI) calcd for  $\text{C}_{19}\text{H}_{17}\text{Cl}$ : 280.1019  $[\text{M}]^+$ ; found: 280.1011.

**1-(chloro(4-fluorophenyl)methyl)naphthalene (1e)**<sup>[1]</sup>, yellowish solid (1.22 g, 90% yield).  $^1\text{H}$  NMR (400 MHz,  $\text{CDCl}_3$ )  $\delta$  8.00–7.93 (m, 1H), 7.81–7.77 (m, 1H), 7.75 (d,  $J = 8.3$  Hz, 1H), 7.54 (d,  $J = 7.2$  Hz, 1H), 7.45–7.29 (m, 5H), 6.92 (t,  $J = 8.6$  Hz, 2H), 6.77 (s, 1H).  $^{13}\text{C}$  NMR (101 MHz,  $\text{CDCl}_3$ )  $\delta$  162.5 (d,  $J_{\text{CF}} = 247.5$  Hz), 136.5 (d,  $J_{\text{CF}} = 3.3$  Hz), 134.0, 134.2, 130.5, 120.0 (d,  $J_{\text{CF}} = 8.3$  Hz), 129.6, 129.2, 126.9, 126.8, 126.1, 125.4, 123.8, 115.7 (d,  $J_{\text{CF}} = 21.7$  Hz), 77.6, 77.3, 77.0, 61.3.  $^{19}\text{F}$  NMR (376 MHz,  $\text{CDCl}_3$ )  $\delta$  -113.42.

**1-(chloro(4-chlorophenyl)methyl)naphthalene (1f)**, yellowish solid (1.32 g, 91% yield). mp 66–68 °C.  $^1\text{H}$  NMR (400 MHz,  $\text{CDCl}_3$ )  $\delta$  8.06–7.96 (m, 1H), 7.92–7.87 (m, 1H), 7.85 (d,  $J = 8.3$  Hz, 1H), 7.58 (d,  $J = 7.2$  Hz, 1H), 7.55–7.43 (m, 3H), 7.43–7.36 (m, 2H), 7.35–7.27 (m, 2H), 6.83 (s, 1H).  $^{13}\text{C}$  NMR (101 MHz,  $\text{CDCl}_3$ )  $\delta$  139.1, 135.6, 134.1, 130.4, 129.6, 129.5, 129.1, 128.8, 126.9, 126.7, 126.1, 125.3, 123.7, 77.5, 77.2, 76.8, 61.1. IR (KBr) 3058, 2925, 2856, 1597, 1510, 1490, 1397, 1091, 1014, 821, 797, 777, 741  $\text{cm}^{-1}$ ; HRMS (EI) calcd for  $\text{C}_{17}\text{H}_{12}\text{Cl}_2$ : 286.0316  $[\text{M}]^+$ ; found: 286.0309.

**1-(1-chloroethyl)naphthalene (1i)**<sup>[1]</sup>, yellow oil (1.88 g, 90% yield).  $^1\text{H}$  NMR (400 MHz,  $\text{CDCl}_3$ )  $\delta$  8.19 (d,  $J = 8.5$  Hz, 1H), 7.93–7.85 (m, 1H), 7.82 (d,  $J = 8.2$  Hz, 1H), 7.71 (dd,  $J = 7.2, 1.2$  Hz, 1H), 7.60–7.56 (m, 1H), 7.54–7.44 (m, 2H), 5.90 (q,  $J = 6.8$  Hz, 1H), 2.06 (d,  $J = 6.8$  Hz, 3H).

**1-(1-chloropropyl)naphthalene (1j)**<sup>[3]</sup>, yellow oil (1.87g, 92% yield).  $^1\text{H}$  NMR (400 MHz,  $\text{CDCl}_3$ )  $\delta$  8.15 (d,  $J = 8.5$  Hz, 1H), 7.87 (d,  $J = 8.1$  Hz, 1H), 7.80 (d,  $J = 8.3$  Hz, 1H), 7.68 (d,  $J = 7.2$  Hz, 1H), 7.61–7.41 (m, 3H), 5.61 (t,  $J = 6.8$  Hz, 1H), 2.45–2.21 (m,  $J = 7.0$  Hz, 2H), 1.11 (t,  $J = 7.3$  Hz, 3H).

**1-(1-chloro-2-methylpropyl)naphthalene (1k)**<sup>[1]</sup>, yellow oil (1.97 g, 96% yield).  $^1\text{H}$  NMR (400 MHz,  $\text{CDCl}_3$ )  $\delta$  8.10 (d,  $J = 8.5$  Hz, 1H), 7.88 (dd,  $J = 8.1, 1.6$  Hz, 1H), 7.80 (d,  $J = 8.2$  Hz, 1H), 7.71 (d,  $J = 7.3$  Hz, 1H), 7.59–7.44 (m, 3H), 5.49 (d,  $J = 7.4$  Hz, 1H), 2.59–2.50 (m, 1H), 1.18 (d,  $J = 6.5$  Hz, 3H), 0.94 (d,  $J = 6.7$  Hz, 3H).

**1-(1-chlorobutyl)naphthalene (1l)**<sup>[1]</sup>, yellow oil (2.04 g, 94% yield).  $^1\text{H}$  NMR (400 MHz,  $\text{CDCl}_3$ )  $\delta$  8.16 (d,  $J = 8.5$  Hz, 1H), 7.88 (d,  $J = 8.1$  Hz, 1H), 7.82 (d,  $J = 8.2$  Hz, 1H), 7.70 (d,  $J = 7.2$  Hz, 1H), 7.57 (t,  $J = 7.7$  Hz, 1H), 7.52–7.46 (m, 2H), 5.70 (dd,  $J = 8.6, 5.6$  Hz, 1H), 2.39–2.19 (m, 2H), 1.72–1.59 (m, 1H), 1.57–1.42 (m, 1H), 0.99 (t,  $J = 7.4$  Hz, 3H).

**1-(1-chloropentyl)naphthalene (1m)**<sup>[3]</sup>, yellow oil (2.21 g, 95% yield).  $^1\text{H}$  NMR (400 MHz,  $\text{CDCl}_3$ )  $\delta$  8.16 (d,  $J = 8.6$  Hz, 1H), 7.88 (d,  $J = 8.1$  Hz, 1H), 7.82 (d,  $J = 8.2$  Hz, 1H), 7.70 (d,  $J = 7.2$  Hz, 1H), 7.63–7.54 (m, 1H), 7.52–7.46 (m, 2H), 5.69 (t,  $J = 7.0$  Hz, 1H), 2.34–2.27 (m, 2H), 1.61–1.59 (m, 1H), 1.47–1.33 (m, 3H), 0.92 (t,  $J = 7.0$  Hz, 3H).

**1-(chloro(phenyl)methyl)-4-methylnaphthalene (1r)**<sup>[4]</sup>, yellow oil (1.31 g, 92%). <sup>1</sup>H NMR (400 MHz, CDCl<sub>3</sub>) δ 8.07–8.00 (m, 1H), 8.00–7.94 (m, 1H), 7.48–7.43 (m, 2H), 7.42–7.36 (m, 3H), 7.30–7.20 (m, 4H), 6.80 (s, 1H), 2.62 (s, 3H).

### Representative procedure for synthesis of starting materials 1g:

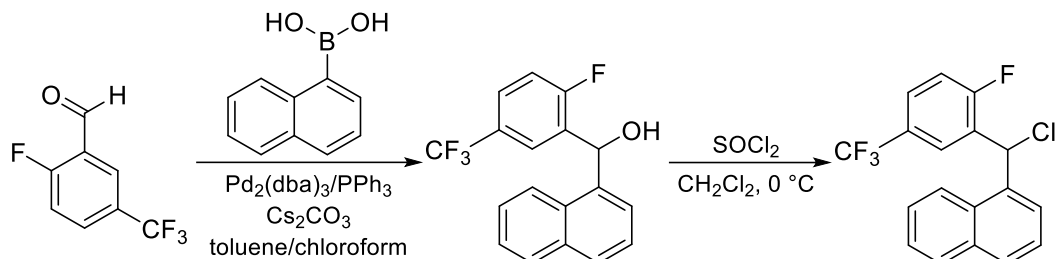

Pd<sub>2</sub>(dba)<sub>3</sub> (0.025 mmol, 5 mol%) and triphenylphosphine (0.05 mmol, 5 mol%), 1-naphthyl boronic acid (2.0 mmol), 2-fluoro-5-(trifluoromethyl)benzaldehyde (1.0 mmol), and Cs<sub>2</sub>CO<sub>3</sub> (1.0 mmol) were dissolved in toluene (2 mL) and chloroform (0.01 mL). After the mixture was stirred at 80 °C for 24 h, then the product was extracted with CH<sub>2</sub>Cl<sub>2</sub> (10 mL × 3). The combined organic layers were washed with brine (10 mL × 3), dried over Na<sub>2</sub>SO<sub>4</sub> and filtrated. The solvent was removed by evaporation under vacuum to afford a crude product. The crude product was purified by silica gel column chromatography (eluent: hexane/ethyl acetate = 20:1) to afford (2-fluoro-5-(trifluoromethyl)phenyl)(naphthalen-1-yl)methanol (0.28 g, 91% yield) as a white solid.

To a solution of (2-fluoro-5-(trifluoromethyl)phenyl)(naphthalen-1-yl)methanol (0.28 g, 0.91 mmol) in dichloromethane (CH<sub>2</sub>Cl<sub>2</sub>, 5 mL) at 0 °C, SOCl<sub>2</sub> (2 equiv.) was slowly added. The resulting mixture was stirred overnight at room temperature, and then the aqueous sodium bicarbonate (10 mL) was added to quench the reaction for neutralize excess of SOCl<sub>2</sub>. The resulting mixture was washed with dichloromethane (5 mL × 3), the combined organic layers were washed with brine (5 mL × 3) and dried over Na<sub>2</sub>SO<sub>4</sub>. The solvent was removed under reduced pressure to give 1-(chloro(phenyl)methyl)-4-methylnaphthalene (**1g**) as a yellow oil (0.27 g, 88% yield), which was used without further purification in the amination reaction. <sup>1</sup>H NMR (400 MHz, CDCl<sub>3</sub>) δ 7.95 (d, *J* = 8.4 Hz, 1H), 7.80–7.78 (m, 1H), 7.75–7.69 (m, 2H), 7.44–7.40 (m, 3H), 7.38–7.35 (m, 1H), 7.33–7.29 (m, 1H), 7.07 (s, 1H), 7.03–6.99 (m, 1H). <sup>13</sup>C NMR (101 MHz, CDCl<sub>3</sub>) δ 161.1 (d, *J*<sub>CF</sub> = 257.8 Hz), 134.3, 134.0, 130.3, 129.8, 129.3, 129.2, 127.6 (qd, *J*<sub>CF</sub> = 4.2 Hz), 127.5 (d, *J*<sub>CF</sub> = 3.7 Hz), 127.1 (d, *J*<sub>CF</sub> = 3.6 Hz), 127.0, 126.1 (d, *J*<sub>CF</sub> = 7.1 Hz), 125.3, 122.3 (q, *J*<sub>CF</sub> = 272.4 Hz, CF<sub>3</sub>), 122.8, 116.5, 116.3, 77.4, 77.1, 76.8, 53.3 (d, *J*<sub>CF</sub> = 5.7 Hz). <sup>19</sup>F NMR (376 MHz, CDCl<sub>3</sub>) δ -61.88, -110.86. IR (neat) 2831, 2787, 1587, 1504, 1455, 1392, 1330, 1164, 1125, 1015, 896, 825, 763 cm<sup>-1</sup>; HRMS (EI) calcd for C<sub>18</sub>H<sub>11</sub>ClF<sub>4</sub>: 338.0485 [M]<sup>+</sup>; found: 338.0478.

### Representative procedure for synthesis of starting materials 1h:

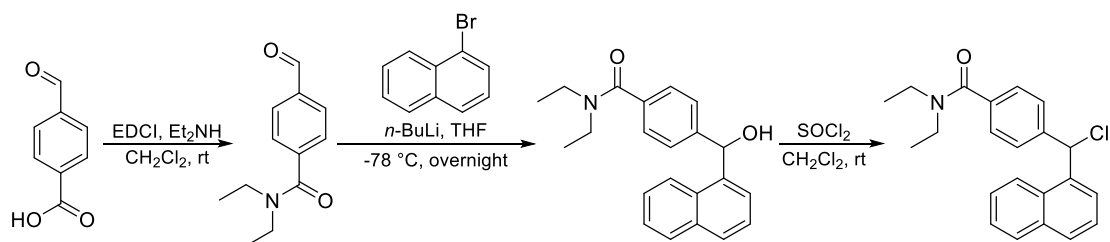

1-(3-Dimethylaminopropyl)-3-ethylcarbodiimide hydrochloride (8.45 g, 44 mmol) was added

portionwise to a cold solution (0 °C) of 4-formylbenzoic acid (6.02 g, 40 mmol), diethylamine (2.93 g, 40 mmol), and triethylamine (6 mL) in 100 mL of anhydrous CH<sub>2</sub>Cl<sub>2</sub>. The mixture was stirred at 0 °C for 30 min and warmed to the room temperature under N<sub>2</sub>. After 4 h, the reaction was quenched by the addition of 60 mL of saturated aqueous NaHCO<sub>3</sub>. The layers were separated, and the aqueous layer was extracted with CH<sub>2</sub>Cl<sub>2</sub> (2 × 30 mL). The combined organics were washed successively with water, aqueous hydrochloric acid (5%), water, and brine, then dried over Na<sub>2</sub>SO<sub>4</sub>, and concentrated. The residue obtained was purified via silica gel chromatography (eluent: hexane/ethyl acetate = 5:1) to afford *N,N*-diethyl-4-formylbenzamide as a yellow oil (0.82 g, 10% yield).

1-bromonaphthalene (0.39 mL, 3.0 mmol) was dissolved in THF (10 mL) and cooled to -78 °C. *n*-BuLi (1.2 mL, 2.5 M in *n*-hexane, 3.0 mmol) was added dropwise. After 30 min *N,N*-diethyl-4-formylbenzamide (0.60 g, 3.0 mmol) was added dissolved in THF (2 mL). The solution was stirred 1 h, then NH<sub>4</sub>Cl (aq) was added. After aqueous workup and chromatography on silica (eluent: hexane/ethyl acetate = 2:1) of *N,N*-diethyl-4-(hydroxy(naphthalen-1-yl)methyl)benzamide was obtained as a yellow solid (0.58 g, 58% yield).

*N,N*-diethyl-4-(hydroxy(naphthalen-1-yl)methyl)benzamide (0.58 g, 1.75 mmol) was dissolved in dry CH<sub>2</sub>Cl<sub>2</sub> (10 mL) and SOCl<sub>2</sub> (0.15 mL, 1.93 mmol) was added. The solution was stirred at 25 °C for 1 h and the solvent was evaporated in vacuo. 4-(chloro(naphthalen-1-yl)methyl)-*N,N*-diethylbenzamide (**1h**) (yellowish oil, 0.58 g, 95% yield) was obtained and used in the next reaction without further purification. <sup>1</sup>H NMR (400 MHz, CDCl<sub>3</sub>) δ 8.01–7.94 (m, 1H), 7.85–7.74 (m, 2H), 7.50 (d, *J* = 7.2 Hz, 1H), 7.45–7.40 (m, 4H), 7.37 (d, *J* = 7.7 Hz, 1H), 7.29 (d, *J* = 7.9 Hz, 2H), 6.81 (s, 1H), 3.33 (bs, s, 4H), 1.10 (bs, s, 6H). <sup>13</sup>C NMR (101 MHz, CDCl<sub>3</sub>) δ 170.7, 141.4, 137.0, 135.7, 134.0, 130.4, 129.5, 129.0, 128.1, 127.0, 126.7, 126.6, 126.0, 125.2, 123.7, 77.4, 77.1, 76.8, 61.3, 43.3, 14.1. IR (neat) 3050, 2972, 2873, 1628, 1509, 1458, 1381, 1287, 1159, 1071, 947, 825, 800, 736 cm<sup>-1</sup>; HRMS (ESI) calcd for C<sub>22</sub>H<sub>22</sub>ClN<sub>2</sub>O: 374.1288 [M+Na]<sup>+</sup>; found: 374.1282.

### Representative procedure for synthesis of starting materials 1a-d<sub>1</sub>:

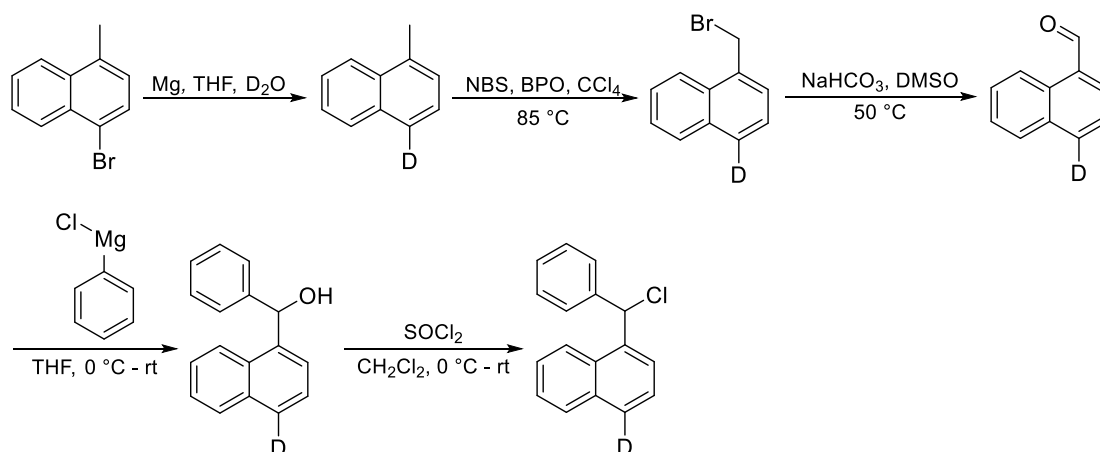

To a mixture of magnesium ribbon (0.28 g, 11 mmol) in dry THF (30 mL), 1-bromo-4-methylnaphthalene (2.21 g, 10 mmol) was added dropwise keeping reflux under a N<sub>2</sub> atmosphere. After the reaction temperature downed to room temperature, the resulting mixture was stirred for another 1 h, and then D<sub>2</sub>O (0.3 mL) was added to quench the reaction at 0 °C. The resulting

mixture was stirred overnight at room temperature, then solvents were removed under vacuum, and the residue obtained was then extracted with ethyl acetate (10 mL  $\times$  3). The combined organic layers were washed with brine (30 mL), dried over Na<sub>2</sub>SO<sub>4</sub>. The crude product was then purified via silica gel chromatography (eluent: hexane) to afford 1-methylnaphthalene-4-*d* as a colorless oil (1.17 g, 82% yield).

1-Methylnaphthalene-4-*d* (1.17 g, 8.2 mmol) and N-bromosuccinimide (NBS) (1.60 g, 9.0 mmol) were dissolved in CCl<sub>4</sub> (50 mL). The mixture was stirred at 85 °C, benzoyl peroxide (BPO) (0.024 g, 0.10 mmol) was added into the mixture immediately when the solution was refluxed. After the resulting mixture was stirred under reflux for 12 h, the mixture was allowed to cool to room temperature, then the mixture was transferred to ice-salt bath, solid was obtained after filtration. The crude product was then purified via silica gel chromatography (eluent: hexane) to afford 1-(bromomethyl)naphthalene-4-*d* as a colorless oil (1.09 g, 60% yield).

A suspension of 1-(bromomethyl)naphthalene-4-*d* (1.09 g, 4.9 mmol), NaHCO<sub>3</sub> (0.8233 g, 9.8 mmol) in DMSO (20 mL) was heated to 95 °C for 3 h. Then the mixture was cooled to room temperature. The mixture was quenched with H<sub>2</sub>O (50 mL). Then the mixture was washed by ethyl acetate (50 mL  $\times$  3). And the combined organic layers were washed with brine (50 mL  $\times$  3), dried over anhydrous Na<sub>2</sub>SO<sub>4</sub> and purified via silica gel chromatography (hexane/ethyl acetate = 20:1) to afford 1-naphthaldehyde-4-*d* as a colorless oil (0.32 g, 42% yield).

To an oven-dried 25-mL round-bottom flask containing 1-naphthaldehyde-4-*d* (0.32g, 2.0 mmol) in THF (5 mL), Phenylmagnesium chloride (1.5 mL, 2.0 M in THF, 3.0mmol) was added dropwise at 0 °C under a N<sub>2</sub> atmosphere. The resulting mixture was stirred overnight at room temperature, and then the saturated NH<sub>4</sub>Cl aqueous solution (5 mL) was added to quench the reaction. And then the resulting mixture was extracted with ethyl ether (5 mL  $\times$  3). The combined organic layers were washed with brine (10 mL), dried over Na<sub>2</sub>SO<sub>4</sub> and filtrated. The solvent was removed by evaporation under vacuum to afford a crude product. The crude product was purified by silica gel column chromatography (eluent: hexane/ethyl acetate = 10:1) to afford (naphthalen-1-yl-4-*d*)(phenyl)methanol as a white solid (0.35 g, 74% yield).

To a solution of (naphthalen-1-yl-4-*d*)(phenyl)methanol (0.35 g, 1.5 mmol) in dichloromethane (CH<sub>2</sub>Cl<sub>2</sub>, 10 mL) at 0 °C, SOCl<sub>2</sub> (2 equiv.) was slowly added. The resulting mixture was stirred overnight at room temperature, and then the aqueous sodium bicarbonate (10 mL) was added to quench the reaction for neutralize excess of SOCl<sub>2</sub>. The resulting mixture was washed with dilute aqueous sodium bicarbonate (5 mL  $\times$  3), the combined organic layers were washed with brine (20 mL) and dried over Na<sub>2</sub>SO<sub>4</sub>. The solvent was removed under reduced pressure to give 1-(chloro(phenyl)methyl) naphthalene-4-*d* (**1a-d<sub>1</sub>**) as a yellowish oil (0.35 g, 92% yield, 88% D). <sup>1</sup>H NMR (400 MHz, CDCl<sub>3</sub>)  $\delta$  8.08–8.01 (m, 1H), 7.85–7.80 (m, 1H), 7.57 (d, *J* = 7.2 Hz, 1H), 7.48–7.37 (m, 5H), 7.34–7.21 (m, 3H), 6.85 (s, 1H). <sup>13</sup>C NMR (101 MHz, CDCl<sub>3</sub>)  $\delta$  140.6, 136.2, 134.0, 130.6, 129.0, 128.7, 128.2, 128.1, 127.0, 126.7, 126.0, 125.2, 123.9, 77.5, 77.2, 76.9, 61.9. IR (neat) 3059, 2925, 2849, 1592, 1494, 1452, 1386, 1251, 1030, 822, 766, 712, 798 cm<sup>-1</sup>; HRMS (EI) calcd for C<sub>17</sub>H<sub>12</sub>DCl: 253.0769 [M]<sup>+</sup>; found: 253.0762.

### 3. Optimization of Reaction Conditions (Method A)

**Table S1** Optimization of the reaction conditions for the dimethylamination of 1-(chloro(phenyl)-methyl)naphthalene with DMF

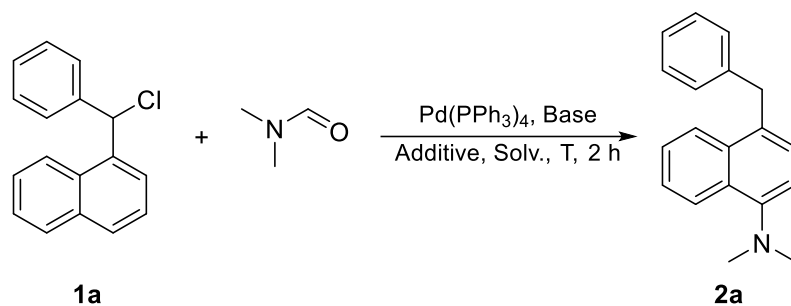

| Entry <sup>a</sup> | The ratio of <b>1a</b> to <b>DMF</b> | Base/X equiv.                      | Additive /X $\mu$ L     | Solv.       | T ( $^{\circ}$ C) | <b>2a</b> yield (%) <sup>b</sup> |
|--------------------|--------------------------------------|------------------------------------|-------------------------|-------------|-------------------|----------------------------------|
| 1                  | 1:1                                  | Cs <sub>2</sub> CO <sub>3</sub> /4 | None                    | THF         | 60                | ND <sup>c</sup>                  |
| 2                  | 1:1                                  | Na <sub>2</sub> CO <sub>3</sub> /4 | None                    | THF         | 60                | ND <sup>c</sup>                  |
| 3                  | 1:1                                  | K <sub>3</sub> PO <sub>4</sub> /4  | None                    | THF         | 60                | ND <sup>c</sup>                  |
| 4                  | 1:1                                  | NaH/4                              | None                    | THF         | 60                | ND <sup>c</sup>                  |
| 5                  | 1:1                                  | LiO <sup>t</sup> Bu/4              | None                    | THF         | 60                | ND <sup>c</sup>                  |
| 6                  | 1:1                                  | KO <sup>t</sup> Bu/4               | None                    | THF         | 60                | 15                               |
| 7                  | 1:1                                  | NaO <sup>t</sup> Bu/4              | None                    | THF         | 60                | 35                               |
| 8                  | 1:1                                  | NaO <sup>t</sup> Bu/4              | None                    | 2-MeTHF     | 60                | 39                               |
| 9                  | 1:1                                  | NaO <sup>t</sup> Bu/4              | None                    | DMF         | 60                | 23                               |
| 10                 | 1:1                                  | NaO <sup>t</sup> Bu/4              | None                    | 1,4-dioxane | 60                | 12                               |
| 11                 | 1:1                                  | NaO <sup>t</sup> Bu/4              | None                    | DME         | 60                | 29                               |
| 12                 | 1:1                                  | NaO <sup>t</sup> Bu/4              | None                    | toluene     | 60                | 9                                |
| 13                 | 1:1                                  | NaO <sup>t</sup> Bu/4              | None                    | acetone     | 60                | trace <sup>d</sup>               |
| 14                 | 1:2                                  | NaO <sup>t</sup> Bu/4              | None                    | 2-MeTHF     | 60                | 42                               |
| 15                 | 1:3                                  | NaO <sup>t</sup> Bu/4              | None                    | 2-MeTHF     | 60                | 45                               |
| 16                 | 1:4                                  | NaO <sup>t</sup> Bu/4              | None                    | 2-MeTHF     | 60                | 39                               |
| 17                 | 1:3                                  | NaO <sup>t</sup> Bu/4              | None                    | 2-MeTHF     | 40                | 17                               |
| 18                 | 1:3                                  | NaO <sup>t</sup> Bu/4              | None                    | 2-MeTHF     | 80                | 48                               |
| 19                 | 1:3                                  | NaO <sup>t</sup> Bu/4              | None                    | 2-MeTHF     | 100               | 34                               |
| 20                 | 1:3                                  | NaO <sup>t</sup> Bu/4              | H <sub>2</sub> O/2      | 2-MeTHF     | 80                | 86                               |
| <b>21</b>          | 1:3                                  | <b>NaO<sup>t</sup>Bu/4</b>         | <b>H<sub>2</sub>O/5</b> | 2-MeTHF     | <b>80</b>         | <b>97(95)</b>                    |
| 22                 | 1:3                                  | NaO <sup>t</sup> Bu/4              | H <sub>2</sub> O/10     | 2-MeTHF     | 80                | 88                               |
| 23                 | 1:3                                  | NaO <sup>t</sup> Bu/4              | H <sub>2</sub> O/20     | 2-MeTHF     | 80                | 75                               |
| 24                 | 1:3                                  | NaO <sup>t</sup> Bu/4              | H <sub>2</sub> O/60     | 2-MeTHF     | 80                | 62                               |
| 25                 | 1:3                                  | NaO <sup>t</sup> Bu/1              | H <sub>2</sub> O/5      | 2-MeTHF     | 80                | 47                               |
| 26                 | 1:3                                  | NaO <sup>t</sup> Bu/2              | H <sub>2</sub> O/5      | 2-MeTHF     | 80                | 71                               |
| 27                 | 1:3                                  | NaO <sup>t</sup> Bu/3              | H <sub>2</sub> O/5      | 2-MeTHF     | 80                | 65                               |
| 28                 | 1:3                                  |                                    | H <sub>2</sub> O/5      | 2-MeTHF     | 80                | NR <sup>e</sup>                  |
| 29                 | 1:3                                  | NaO <sup>t</sup> Bu/4              | H <sub>2</sub> O/5      | 2-MeTHF     | 80                | NR <sup>e,f</sup>                |

<sup>a</sup>Reaction conditions: 1-( $\alpha$ -chlorobenzyl) naphthalene (**1a**, 0.3 mmol), DMF (X equiv.), Pd(PPh<sub>3</sub>)<sub>4</sub> (5 mol%), base (X equiv.) and H<sub>2</sub>O (X  $\mu$ L), in solvent (3 mL) at T  $^{\circ}$ C under N<sub>2</sub> atmosphere, 2 h. <sup>b</sup>Yields determined by <sup>1</sup>H NMR using 1,3,5-trimethoxybenzene as an internal standard. Isolated yield is given in parentheses. <sup>c</sup>Not detected; **1a** was decomposed. <sup>d</sup>Trace amount of product **2a** was observed; starting material **1a** was



decomposed. <sup>e</sup>No reaction; **1a** was recovered. <sup>f</sup>No catalyst was added.

## 4. Optimization of Reaction Conditions (method B)

**Table S2** Optimization of the reaction conditions for the dimethylation of 1-(1-chloroethyl)naphthalene with DMF

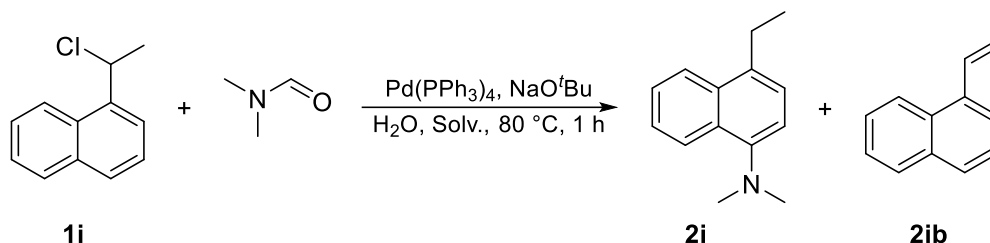

| Entry <sup>a</sup> | Base                     | Additive              | Solv.              | T (°C)    | <b>2i</b> yield (%) <sup>b</sup> | <b>2ib</b> yield (%) <sup>b</sup> |
|--------------------|--------------------------|-----------------------|--------------------|-----------|----------------------------------|-----------------------------------|
| 1                  | NaO <sup>t</sup> Bu      | H <sub>2</sub> O      | 2-MeTHF            | 80        | 15                               | 75                                |
| 2                  | NaO <sup>t</sup> Bu      | H <sub>2</sub> O      | THF                | 80        | 12                               | 78                                |
| 3 <sup>c</sup>     | NaO <sup>t</sup> Bu      | H <sub>2</sub> O      | CH <sub>3</sub> CN | 80        | trace                            | 70                                |
| 4                  | NaO <sup>t</sup> Bu      | H <sub>2</sub> O      | DME                | 80        | 4                                | 87                                |
| <b>5</b>           | <b>NaO<sup>t</sup>Bu</b> | <b>H<sub>2</sub>O</b> | <b>DMF</b>         | <b>80</b> | <b>46(44)</b>                    | <b>18</b>                         |
| 6                  | NaO <sup>t</sup> Bu      | H <sub>2</sub> O      | DMSO               | 80        | 6                                | 64                                |

<sup>a</sup>Reaction conditions: 1-(1-chloroethyl)naphthalene (**1i**, 0.3 mmol), DMF (3 equiv.), Pd(PPh<sub>3</sub>)<sub>4</sub> (5 mol%), NaO<sup>t</sup>Bu (4 equiv.) and H<sub>2</sub>O (5 μL), in solvent (3 mL) at 80 °C under N<sub>2</sub> atmosphere, 1 h. <sup>b</sup><sup>1</sup>H NMR yields using CH<sub>2</sub>Br<sub>2</sub> as an internal standard. Isolated yield is given in parentheses. <sup>c</sup>Trace amount of product **2i** was observed; starting material **1i** was decomposed.

## 5. General Procedure for Remote dimethylation

### Method A:

#### Representative Procedure for Obtaining Products **2a-2h**, **2n-2r**:

An oven-dried 25-mL Schlenk tube was charged with a mixture of 1-(chloro(phenyl)methyl)naphthalene (**1a**, 0.3 mmol, 1.0 equiv.), DMF (69.24 μL, 0.9 mmol, 3.0 equiv.), Pd(PPh<sub>3</sub>)<sub>4</sub> (0.0173 g, 5 mol%), NaO<sup>t</sup>Bu (0.1152 g, 1.2 mmol, 4.0 equiv.), H<sub>2</sub>O (5.0 μL) and dry 2-MeTHF (3.0 mL). The reaction mixture was stirred for a certain period under a N<sub>2</sub> atmosphere. After cooled to room temperature, the solvent was removed in *vacuo*. The residue obtained was purified via silica gel chromatography (eluent: hexane/ethyl acetate = 100:1) to afford 4-benzyl-*N,N*-dimethylnaphthalen-1-amine (**2a**) in 95% yield (74.8 mg) as a yellowish solid.

### Method B:

#### Representative Procedure for Obtaining Products **2i-2m**:

An oven-dried 25-mL Schlenk tube was charged with a mixture of 1-(1-chloroethyl)naphthalene (**1i**, 0.3 mmol, 1.0 equiv.), Pd(PPh<sub>3</sub>)<sub>4</sub> (0.0173 g, 5 mol%), NaO<sup>t</sup>Bu (0.1152 g, 1.2 mmol, 4.0 equiv.), H<sub>2</sub>O (5.0 μL) and dry DMF (3.0 mL). The reaction mixture was stirred for 1 h under a N<sub>2</sub> atmosphere. After cooled to room temperature, the reaction mixture was quenched by H<sub>2</sub>O (10 mL). Then the reaction mixture was extracted with ethyl acetate (10 mL × 3). And the combined organic layers were washed with brine (10 mL × 3), dried over anhydrous Na<sub>2</sub>SO<sub>4</sub> and

filtered. The solvent was removed under reduced pressure and the residue obtained was purified via silica gel chromatography (eluent: hexane/ethyl acetate = 100:1) to afford 4-ethyl-*N,N*-dimethylnaphthalen-1-amine (**2i**) in 44% yield (26.3 mg) as a brown oil.

## 6. Gram-scale reaction and derivatization

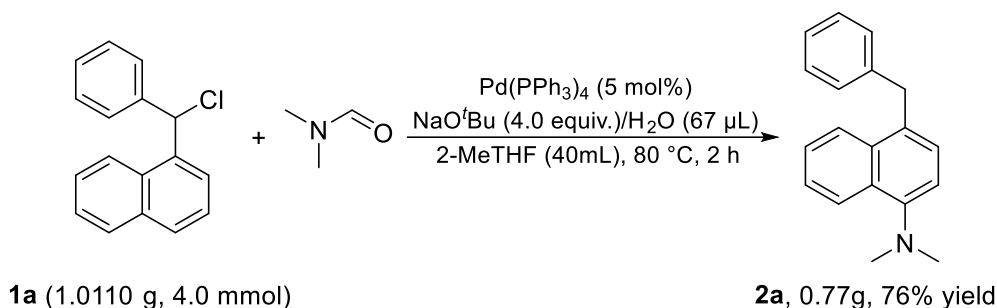

### Scheme S1. Gram-scale reaction.

An oven-dried 100-mL Schlenk tube was charged with a mixture of 1-(chloro(phenyl)methyl)naphthalene (**1a**, 1.011 g, 4.0 mmol), DMF (0.9232 mL, 1.2 mmol, 3.0 equiv.), Pd(PPh<sub>3</sub>)<sub>4</sub> (0.2267 g, 5 mol%), NaO<sup>t</sup>Bu (1.536 g, 16 mmol, 4.0 equiv.), H<sub>2</sub>O (66.67 μL) and dry 2-MeTHF (40.0 mL). The reaction mixture was stirred for 2 h under a N<sub>2</sub> atmosphere. After cooled to room temperature, the reaction mixture was concentrated in a vacuum. And then the residue was extracted with H<sub>2</sub>O (10 mL × 3). The combined aqueous layers were washed by ethyl acetate (30 mL × 3). And the combined organic layers were washed with brine (30 mL × 3), dried over anhydrous Na<sub>2</sub>SO<sub>4</sub> and filtered. The solvent was removed under reduced pressure and the residue obtained was purified via silica gel chromatography (eluent: hexane/ethyl acetate = 100:1) to afford 4-benzyl-*N,N*-dimethylnaphthalen-1-amine (**2a**) in 76% yield (0.768 g) as a yellowish solid.

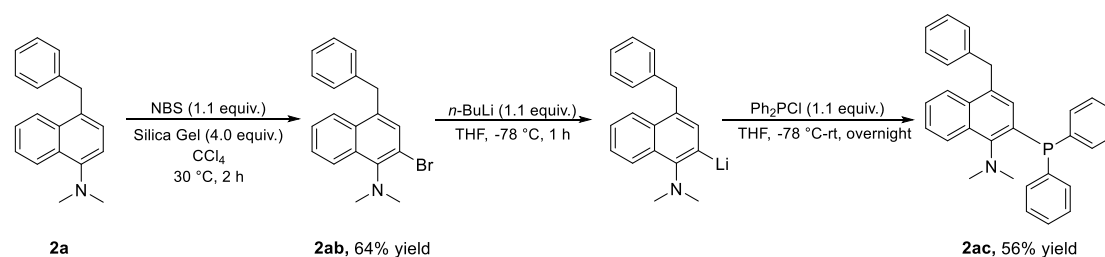

### Scheme S2. Derivatization.

The amination product **2a** was obtained by means of **Method A**. To a solution of **2a** in CCl<sub>4</sub> (3.0 mL), NBS (58.8 mg, 0.33 mmol, 1.1 equiv.) and Silica Gel (72.0 mg, 1.2 mmol, 4.0 equiv.) were added. After the mixture was stirred at 30 °C for 2 h, the insoluble material was removed by filtration, washed with aqueous sodium thiosulfate, and dried over anhydrous Na<sub>2</sub>SO<sub>4</sub>. Filtration, removal of the solvent, and the residue was purified by silica gel column chromatography (eluent: hexane/ethyl acetate = 50:1) to afford the corresponding brominated product **2ab** (65.1 mg, 64% yield).

*n*-BuLi (0.25 mL, 0.55 mmol, 2.5 M in *n*-hexane) was added dropwise at -78 °C to a solution of 4-benzyl-2-bromo-*N,N*-dimethylnaphthalen-1-amine (0.5 mmol) in anhydrous THF (10.0 mL).

After this solution was stirred for 1 h at  $-78\text{ }^{\circ}\text{C}$ , Chlorodiphenyl phosphine (97.0 mL, 5.5 mmol, 1.1 equiv.) was added to this solution at  $-78\text{ }^{\circ}\text{C}$ . Then the reaction mixture was stirred overnight at room temperature. The solvent was evaporated at reduced pressure, and the residue was purified by silica gel column chromatography (eluent: hexane/ethyl acetate = 50:1) to afford the phosphine compound **2ac** (123.6 mg, 56% yield).

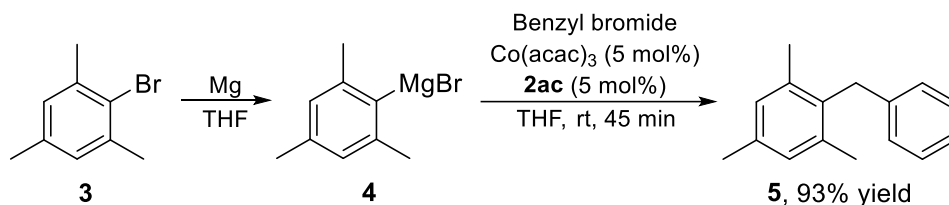

### Scheme S3. The application of **2ac**.

In a round bottom flask (10 mL) magnesium ribbon (0.0960 g, 2.0 equiv) was added in 2 mL of THF. A solution of 2-bromomesitylene (0.3981 g, 2 mmol) in 2 mL of THF was added dropwise to the flask under strong stirring. Keep the mixture slightly boiling. After two hours of reaction, the crude product of MesMgBr was obtained. Benzyl bromide (1 mmol), cobalt tris-(acetylacetonate) (0.018 g, 0.05 mmol), and **2ac** (0.015 g, 0.05 mmol) were weighed neat into a vial (20 mL). THF was added (5 mL), and the reaction was stirred until homogeneous. The solution of MesMgBr was then added, and the reaction mixture was stirred for 45 min. Following this, the reaction mixture was concentrated to dryness. The resulting residue was extracted with hexanes (2 mL  $\times$  3) and concentrated. The crude product was then purified by silica gel chromatography and eluted from pure hexanes to afford the 2-benzyl-1,3,5-trimethylbenzene (**5**, 195.6 mg, 93% yield).

## 7. Control experiments

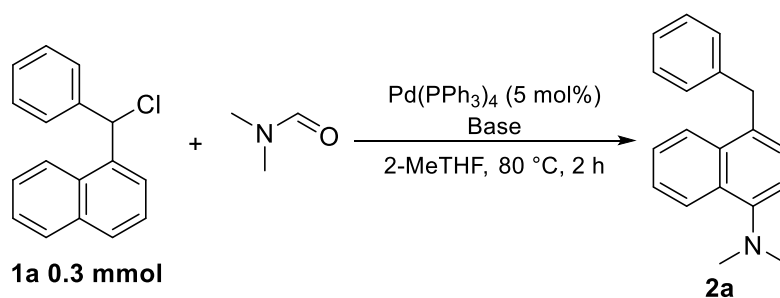

| Bases                                                                               | yield |
|-------------------------------------------------------------------------------------|-------|
| 1) 1.2 mmol NaO <sup>t</sup> Bu, 5 $\mu$ L H <sub>2</sub> O                         | 97%   |
| 2) 0.9222 mmol NaO <sup>t</sup> Bu, 0.2778 mmol NaOH, 0.2778 mmol <sup>t</sup> BuOH | 97%   |
| 3) 0.9222 mmol NaO <sup>t</sup> Bu, 0.2778 mmol NaOH                                | 98%   |
| 4) 0.9222 mmol NaO <sup>t</sup> Bu, 0.2778 mmol <sup>t</sup> BuOH                   | 77%   |
| 5) 1.2 mmol NaOH                                                                    | 87%   |

### Scheme S4. The role of the base and H<sub>2</sub>O.

An oven-dried 25-mL Schlenk tube was charged with a mixture of 1-(chloro(phenyl)methyl)naphthalene (**1a**, 0.3 mmol, 1.0 equiv.), DMF (69.24  $\mu$ L, 0.9 mmol, 3.0 equiv.), Pd(PPh<sub>3</sub>)<sub>4</sub> (0.0173 g, 5 mol%), NaO<sup>t</sup>Bu (0.9222 - 1.2 mmol), NaOH (0 - 1.2 mmol), <sup>t</sup>BuOH (0 - 0.2778 mmol), H<sub>2</sub>O (0 - 5.0  $\mu$ L) and dry 2-MeTHF (3.0 mL). The reaction mixture was stirred for 2 h under a N<sub>2</sub> atmosphere. After cooled to room temperature, the reaction mixture was filtered through celite and the conversion of amide was determined by <sup>1</sup>H NMR using CH<sub>2</sub>Br<sub>2</sub> as an internal standard.

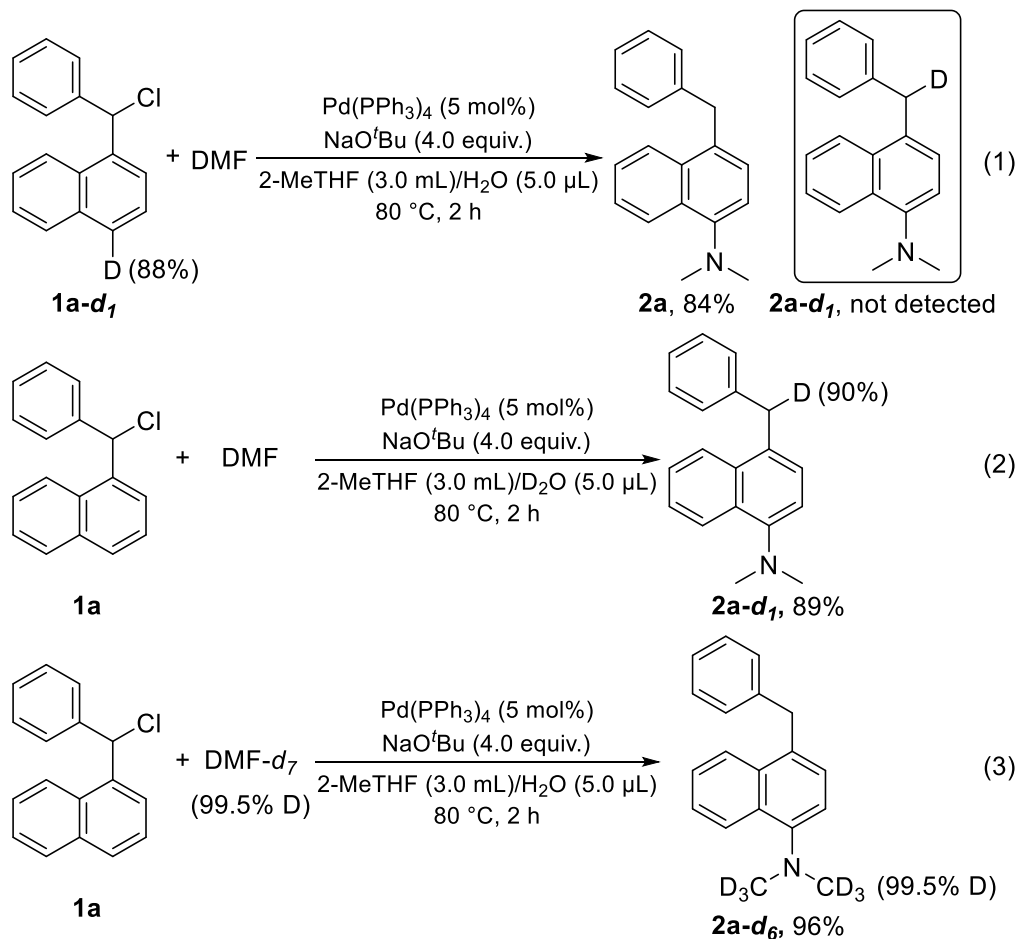

### Scheme S5. Deuterium experiment

An oven-dried 25-mL Schlenk tube was charged with a mixture of **1a** or **1a-d<sub>1</sub>** (0.3 mmol, 1.0 equiv.), DMF or DMF-d<sub>7</sub> (69.24  $\mu$ L, 0.9 mmol, 3.0 equiv.), Pd(PPh<sub>3</sub>)<sub>4</sub> (0.0173 g, 5 mol%), NaO<sup>t</sup>Bu (0.1152 g, 1.2 mmol, 4.0 equiv.), H<sub>2</sub>O or D<sub>2</sub>O (5.0  $\mu$ L) and dry 2-MeTHF (3.0 mL). The reaction mixture was stirred for a certain period under a N<sub>2</sub> atmosphere. After cooled to room temperature, the solvent was removed in *vacuo*. The residue obtained was purified via silica gel chromatography (eluent: hexane/ethyl acetate = 100:1) to afford the corresponding product.

## 8. Plausible mechanism about DMF and Base.

An oven-dried 25-mL Schlenk tube was charged with a mixture of 1-(chloro(phenyl)methyl)naphthalene (**1a**, 0.3 mmol, 1.0 equiv.), DMF (69.24  $\mu$ L, 0.9 mmol, 3.0 equiv.), Pd(PPh<sub>3</sub>)<sub>4</sub> (0.0173 g, 5 mol%), NaO<sup>t</sup>Bu (0.1152 g, 1.2 mmol, 4.0 equiv.), H<sub>2</sub>O (5.0  $\mu$ L) and dry 2-MeTHF (3.0 mL). The reaction mixture was stirred for 2 h at 80 °C under a N<sub>2</sub> atmosphere. After cooled

to room temperature, the solvent was filtered through filter paper and the insoluble solid was determined by  $^1\text{H}$  NMR and  $^{13}\text{C}$  NMR using  $\text{D}_2\text{O}$  as the deuterated solvent.

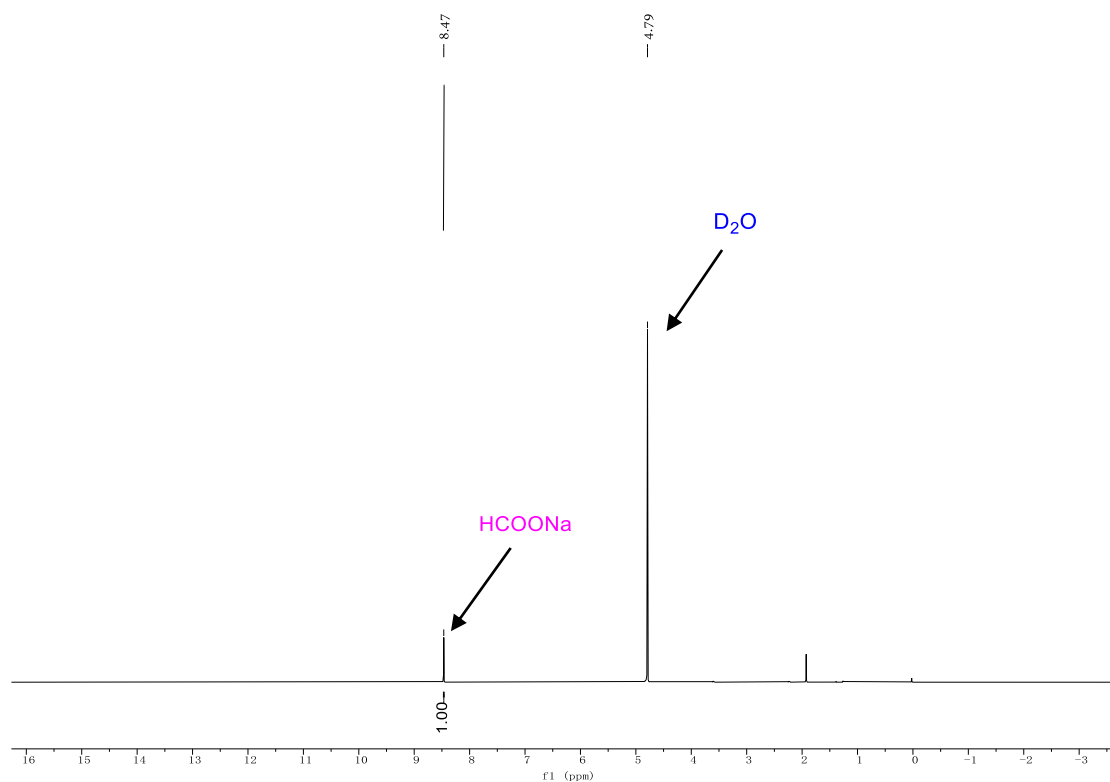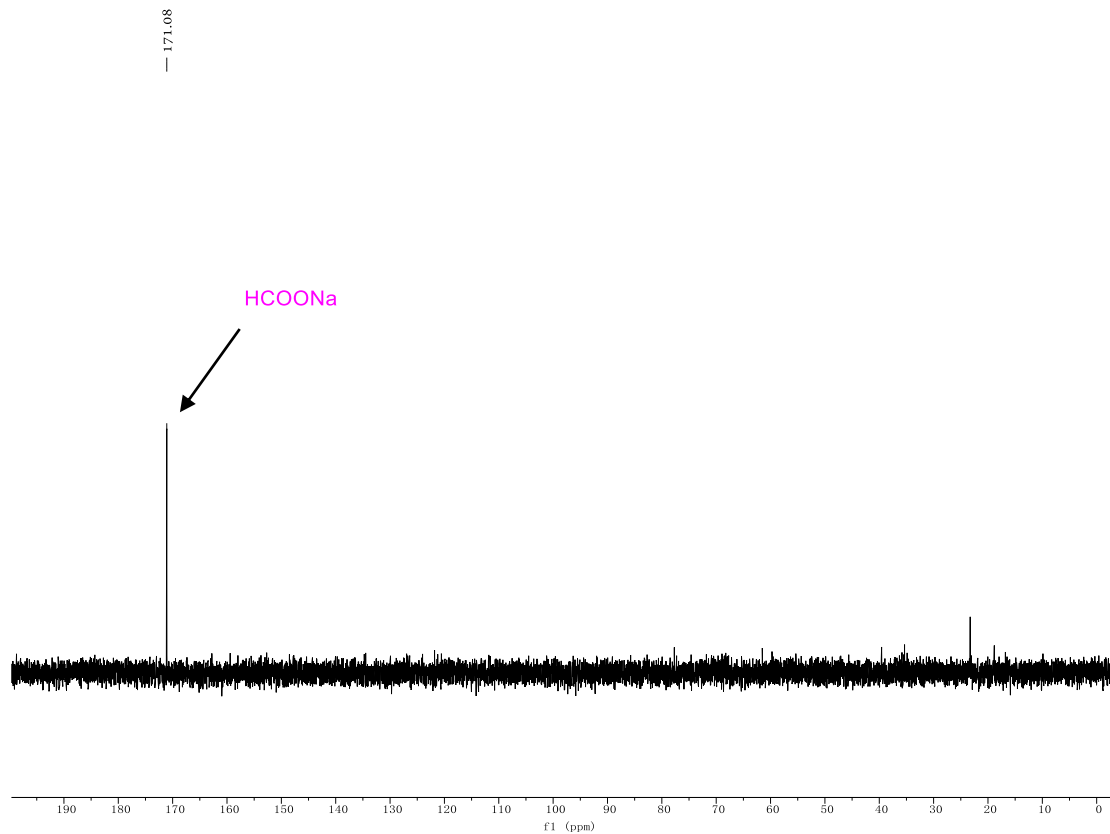

**Figure 1.**  $^1\text{H}$  and  $^{13}\text{C}$  NMR spectra of the solid.

## 9. Characterization Data for All Compounds

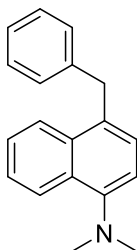

### 4-benzyl-*N,N*-dimethylnaphthalen-1-amine (2a)

Yellowish solid (74.5 mg, 95% yield) mp 80-82 °C. <sup>1</sup>H NMR (400 MHz, CDCl<sub>3</sub>) δ 8.28 (dd, *J* = 8.3, 1.6 Hz, 1H), 7.92 (dd, *J* = 8.2, 1.5 Hz, 1H), 7.46–7.37 (m, 2H), 7.25–7.09 (m, 6H), 6.97 (d, *J* = 7.6 Hz, 1H), 4.33 (s, 2H), 2.83 (s, 6H). <sup>13</sup>C NMR (101 MHz, CDCl<sub>3</sub>) δ 150.1, 141.1, 133.3, 131.3, 129.3, 128.8, 128.6, 128.5, 127.3, 126.1, 125.9, 125.0, 124.9, 124.8, 113.8, 77.5, 77.2, 76.8, 45.5, 38.9; IR (KBr) 3060, 3026, 2925, 2854, 1584, 1493, 1453, 1391, 1304, 1265, 1188, 1043, 907, 845, 766, 717 cm<sup>-1</sup>; HRMS (ESI) calcd for C<sub>19</sub>H<sub>20</sub>N: 262.1596 [M+H]<sup>+</sup>; found: 262.1585.

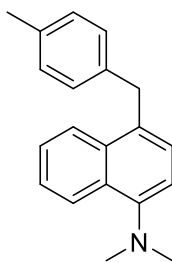

### *N,N*-dimethyl-4-(4-methylbenzyl)naphthalen-1-amine (2b)

Brown solid (77.5 mg, 94% yield) mp 78-80 °C. <sup>1</sup>H NMR (400 MHz, CDCl<sub>3</sub>) δ 8.28 (dd, *J* = 7.9, 1.7 Hz, 1H), 7.99–7.87 (m, 1H), 7.52–7.40 (m, 2H), 7.28–7.15 (m, 1H), 7.12–7.03 (m, 4H), 7.01 (d, *J* = 7.6 Hz, 1H), 4.33 (s, 2H), 2.87 (s, 6H), 2.29 (s, 3H). <sup>13</sup>C NMR (101 MHz, CDCl<sub>3</sub>) δ 137.9, 135.4, 133.2, 131.5, 129.3, 129.1, 128.6, 127.1, 125.8, 124.9, 124.8, 124.7, 113.7, 77.4, 77.1, 76.7, 45.4, 38.4, 21.0. IR (KBr) 3045, 2933, 2861, 2827, 2782, 1654, 1582, 1512, 1454, 1390, 1306, 1187, 1143, 1043, 1015, 910, 823, 767, 737 cm<sup>-1</sup>; HRMS (ESI) calcd for C<sub>20</sub>H<sub>22</sub>N: 276.1752. [M+H]<sup>+</sup>; found: 276.1743.

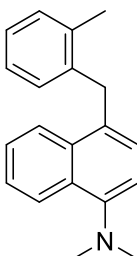

### *N,N*-dimethyl-4-(2-methylbenzyl)naphthalen-1-amine (2c)

Brown oil (71.8 mg, 87% yield). <sup>1</sup>H NMR (400 MHz, CDCl<sub>3</sub>) δ 8.31 (dd, *J* = 7.9, 1.8 Hz, 1H), 7.97–7.90 (m, 1H), 7.54–7.41 (m, 2H), 7.22 (d, *J* = 7.7 Hz, 1H), 7.15 (t, *J* = 7.4 Hz, 1H), 7.07 (t, *J* = 7.4 Hz, 1H), 6.99–6.87 (m, 3H), 4.32 (s, 2H), 2.87 (s, 6H), 2.32 (s, 3H). <sup>13</sup>C NMR (101 MHz,

CDCl<sub>3</sub>)  $\delta$  138.8, 136.7, 133.4, 130.7, 130.1, 129.7, 129.1, 126.4, 126.3, 126.1, 125.9, 125.0, 124.8, 124.4, 113.9, 77.4, 77.1, 76.8, 45.5, 36.0, 19.7. IR (neat) 3066, 2934, 2860, 2827, 1584, 1511, 1455, 1390, 1304, 1187, 1144, 1097, 1045, 1012, 910, 826, 770, 737 cm<sup>-1</sup>; HRMS (ESI) calcd for C<sub>20</sub>H<sub>22</sub>N: 276.1752. [M+H]<sup>+</sup>; found: 276.1741.

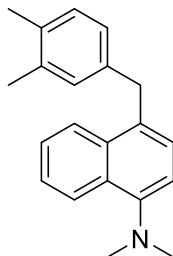

**4-(3,4-dimethylbenzyl)-N,N-dimethylnaphthalen-1-amine (2d)**

Brown oil (75.5 mg, 87% yield). <sup>1</sup>H NMR (400 MHz, CDCl<sub>3</sub>)  $\delta$  8.31–8.25 (m, 1H), 7.97 (dd,  $J$  = 8.3, 1.5 Hz, 1H), 7.49–7.36 (m, 2H), 7.17 (d,  $J$  = 7.6 Hz, 1H), 7.04–6.97 (m, 1H), 6.99 (s, 2H), 6.91 (dd,  $J$  = 7.7, 1.9 Hz, 1H), 4.30 (s, 2H), 2.86 (s, 6H), 2.18 (s, 3H). <sup>13</sup>C NMR (101 MHz, CDCl<sub>3</sub>)  $\delta$  149.8, 138.4, 136.5, 134.1, 133.3, 131.7, 130.1, 129.7, 129.3, 127.1, 126.2, 125.9, 124.9, 124.8, 124.7, 113.8, 77.4, 77.1, 76.8, 45.5, 38.5, 19.9, 19.4. IR (neat) 3068, 2935, 2859, 2827, 2783, 1581, 1504, 1453, 1390, 1301, 1265, 1188, 1143, 1043, 907, 822, 768, 739 cm<sup>-1</sup>; HRMS (ESI) calcd for C<sub>21</sub>H<sub>24</sub>N: 290.1909. [M+H]<sup>+</sup>; found: 290.1908.

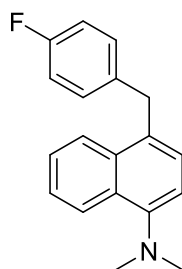

**4-(4-fluorobenzyl)-N,N-dimethylnaphthalen-1-amine (2e)**

Brown oil (74.5 mg, 89 % yield). <sup>1</sup>H NMR (400 MHz, CDCl<sub>3</sub>)  $\delta$  8.29 (dd,  $J$  = 8.2, 1.7 Hz, 1H), 7.89 (dd,  $J$  = 8.0, 1.6 Hz, 1H), 7.47–7.35 (m, 2H), 7.18–7.07 (m, 3H), 7.00 (d,  $J$  = 7.6 Hz, 1H), 6.97–6.87 (m, 2H), 4.31 (s, 2H), 2.86 (s, 6H). <sup>13</sup>C NMR (101 MHz, CDCl<sub>3</sub>)  $\delta$  161.4 (d,  $J$  = 239.5 Hz), 160.2, 150.2, 136.7 (d,  $J$  = 3.3 Hz), 133.2, 131.0, 130.1 (d,  $J$  = 7.8 Hz), 129.4, 127.2, 125.9, 125.0, 124.9, 124.8, 115.2 (d,  $J$  = 21.3 Hz), 113.7, 77.4, 77.1, 76.8, 45.4, 38.1. <sup>19</sup>F NMR (376 MHz, CDCl<sub>3</sub>)  $\delta$  -117.54. IR (neat) 3069, 2981, 2938, 2829, 1582, 1508, 1454, 1391, 1305, 1221, 1156, 1093, 1044, 1014, 907, 824, 769 cm<sup>-1</sup>; HRMS (ESI) calcd for C<sub>19</sub>H<sub>19</sub>FN: 280.1502. [M+H]<sup>+</sup>; found: 280.1489.

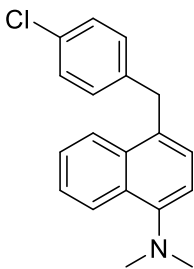

**4-(4-chlorobenzyl)-*N,N*-dimethylnaphthalen-1-amine (2f)**

Brown oil (51.4 mg, 58% yield).  $^1\text{H NMR}$  (400 MHz,  $\text{CDCl}_3$ )  $\delta$  8.32–8.25 (m, 1H), 7.90–7.83 (m, 1H), 7.49–7.34 (m, 2H), 7.21–7.03 (m, 6H), 7.00 (d,  $J = 7.6$  Hz, 1H), 4.31 (s, 2H), 2.87 (s, 6H).  $^{13}\text{C NMR}$  (151 MHz,  $\text{CDCl}_3$ )  $\delta$  150.3, 139.6, 133.1, 131.7, 130.6, 130.1, 129.4, 128.5, 127.3, 125.9, 125.0, 124.9, 124.6, 113.7, 77.3, 77.1, 76.9, 45.4, 38.3. IR (neat) 3068, 2925, 2853, 2783, 1666, 1582, 1509, 1490, 1390, 1304, 1264, 1187, 1043, 1014, 907, 821, 766, 740  $\text{cm}^{-1}$ ; HRMS (ESI) calcd for  $\text{C}_{19}\text{H}_{19}\text{ClN}$ : 296.1206.  $[\text{M}+\text{H}]^+$ ; found: 296.1197.

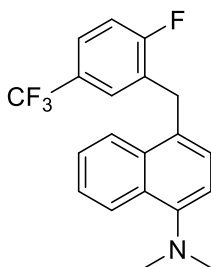

**4-(2-fluoro-5-(trifluoromethyl)benzyl)-*N,N*-dimethylnaphthalen-1-amine (2g)**

Yellow oil (65.6 mg, 61% yield).  $^1\text{H NMR}$  (400 MHz,  $\text{CDCl}_3$ )  $\delta$  8.26–8.22 (m, 1H), 7.86–7.79 (m, 1H), 7.46–7.35 (m, 3H), 7.25–7.19 (m, 1H), 7.12–7.06 (m, 1H), 6.94 (d,  $J = 7.6$  Hz, 1H), 4.32 (s, 2H), 2.81 (s, 6H).  $^{13}\text{C NMR}$  (101 MHz,  $\text{CDCl}_3$ )  $\delta$  162.7 (d,  $J_{\text{CF}} = 7.6$  Hz, 1H), 150.6, 133.0, 129.4, 129.1, 128.9, 128.4 (qd,  $J_{\text{CF}} = 4.1$  Hz, 9.1 Hz), 127.1, 126.2, 125.4 (dq,  $J_{\text{CF}} = 3.9$  Hz, 9.3 Hz), 125.1, 125.0, 124.0, 123.9 (q,  $J_{\text{CF}} = 273.0$  Hz,  $\text{CF}_3$ ), 115.8 (d,  $J_{\text{CF}} = 24.6$  Hz), 113.7, 77.3, 77.0, 76.7, 45.3, 31.2 (d,  $J_{\text{CF}} = 3.1$  Hz).  $^{19}\text{F NMR}$  (376 MHz,  $\text{CDCl}_3$ )  $\delta$  -61.89, -112.06. IR (neat) 3064, 2927, 2855, 1622, 1603, 1502, 1430, 1330, 1267, 1165, 1128, 1072, 1017, 910, 831, 779, 739  $\text{cm}^{-1}$ ; HRMS (ESI) calcd for  $\text{C}_{20}\text{H}_{18}\text{F}_4\text{N}$ : 348.1375.  $[\text{M}+\text{H}]^+$ ; found: 348.1367.

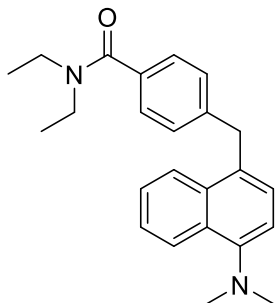

**4-((4-(dimethylamino)naphthalen-1-yl)methyl)-*N,N*-diethylbenzamide (2h)**

Yellowish oil (31.0 mg, 29% yield).  $^1\text{H NMR}$  (400 MHz,  $\text{CDCl}_3$ )  $\delta$  8.21 (d,  $J = 8.3$  Hz, 1H), 7.82 (d,  $J = 8.3$  Hz, 1H), 7.40–7.30 (m, 2H), 7.22–7.16 (m, 2H), 7.15–7.07 (m, 3H), 6.94 (d,  $J = 7.6$  Hz, 1H), 4.30 (s, 2H), 3.30 (br, s, 4H), 2.80 (s, 6H), 1.07 (br, s, 6H).  $^{13}\text{C NMR}$  (151 MHz,  $\text{CDCl}_3$ )  $\delta$



171.4, 150.2, 142.2, 134.9, 133.2, 130.6, 129.3, 128.7, 128.6, 127.4, 126.6, 125.9, 124.9, 124.8, 124.7, 113.7, 77.3, 77.1, 76.9, 45.4, 43.3, 39.3, 38.7, 14.3, 12.9. IR (neat) 3064, 2973, 1915, 1632, 1510, 1424, 1390, 1287, 1188, 1095, 1043, 909, 827, 769, 735  $\text{cm}^{-1}$ ; HRMS (ESI) calcd for  $\text{C}_{24}\text{H}_{29}\text{N}_2\text{O}$ : 361.2280  $[\text{M}+\text{H}]^+$ ; found: 361.2274.

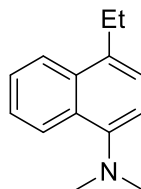

#### 4-ethyl-*N,N*-dimethylnaphthalen-1-amine (2i)

Brown oil (26.3 mg, 44% yield).  $^1\text{H}$  NMR (400 MHz,  $\text{CDCl}_3$ )  $\delta$  8.32–8.25 (m, 1H), 8.04–7.99 (m, 1H), 7.53–7.42 (m, 2H), 7.24 (d,  $J = 7.6$  Hz, 1H), 7.01 (d,  $J = 7.6$  Hz, 1H), 3.10–2.98 (m, 2H), 2.86 (s, 6H), 1.35 (t,  $J = 7.5$  Hz, 3H).  $^{13}\text{C}$  NMR (101 MHz,  $\text{CDCl}_3$ )  $\delta$  149.4, 134.9, 132.9, 129.2, 125.6, 124.8, 124.7, 124.2, 113.9, 77.4, 77.1, 76.8, 45.4, 25.7, 15.1. IR (neat) 3064, 2958, 2867, 2828, 2781, 1732, 1659, 1583, 1495, 1454, 1390, 1265, 1187, 1154, 1043, 965, 900, 832, 766, 738  $\text{cm}^{-1}$ ; HRMS (ESI) calcd for  $\text{C}_{14}\text{H}_{18}\text{N}$ : 200.1439.  $[\text{M}+\text{H}]^+$ ; found: 200.1439.

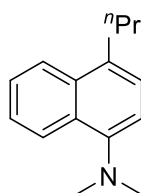

#### *N,N*-dimethyl-4-propylnaphthalen-1-amine (2j)

Brown oil (41.6 mg, 65% yield).  $^1\text{H}$  NMR (400 MHz,  $\text{CDCl}_3$ )  $\delta$  8.31–8.27 (m, 1H), 8.07–7.95 (m, 1H), 7.52–7.45 (m, 2H), 7.23 (d,  $J = 7.6$  Hz, 1H), 7.01 (d,  $J = 7.6$  Hz, 1H), 2.98 (dd,  $J = 8.7, 6.8$  Hz, 2H), 2.86 (s, 6H), 1.81–1.71 (m, 2H), 1.02 (t,  $J = 7.3$  Hz, 3H).  $^{13}\text{C}$  NMR (101 MHz,  $\text{CDCl}_3$ )  $\delta$  133.0, 129.1, 125.7, 125.6, 124.8, 124.7, 124.4, 113.9, 77.4, 77.1, 76.7, 45.5, 35.0, 24.0, 14.3. IR (neat) 3068, 2956, 2868, 2828, 2782, 1663, 1583, 1511, 1458, 1391, 1303, 1188, 1045, 993, 911, 828, 765  $\text{cm}^{-1}$ ; HRMS (ESI) calcd for  $\text{C}_{15}\text{H}_{20}\text{N}$ : 214.1596.  $[\text{M}+\text{H}]^+$ ; found: 214.1585.

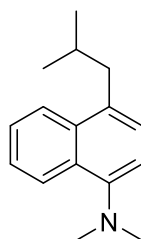

#### 4-isobutyl-*N,N*-dimethylnaphthalen-1-amine (2k)

Brown oil (60.0 mg, 88% yield).  $^1\text{H}$  NMR (400 MHz,  $\text{CDCl}_3$ )  $\delta$  8.21 (dd,  $J = 6.5, 3.5$  Hz, 1H), 7.90 (dd,  $J = 6.5, 3.4$  Hz, 1H), 7.38 (dd,  $J = 6.7, 3.4$  Hz, 2H), 7.09 (d,  $J = 7.5$  Hz, 1H), 6.91 (d,  $J = 7.5$  Hz, 1H), 2.77 (s, 7H), 2.75 (s, 1H), 2.00–1.88 (m, 1H), 0.88 (dd,  $J = 6.6, 1.3$  Hz, 6H).  $^{13}\text{C}$  NMR (101 MHz,  $\text{CDCl}_3$ )  $\delta$  149.4, 133.3, 132.5, 129.3, 126.9, 125.4, 124.7, 124.6, 113.6, 77.4, 77.1, 76.7, 45.4, 42.5, 29.4, 29.2, 22.9. IR (neat) 3069, 2952, 2865, 2827, 2782, 1659, 1583, 1511, 1461, 1303, 1254, 1188, 1144, 1046, 1008, 909, 840, 812, 765  $\text{cm}^{-1}$ ; HRMS (ESI) calcd for

C<sub>16</sub>H<sub>22</sub>N: 228.1752. [M+H]<sup>+</sup>; found: 228.1742.

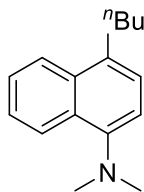

**4-butyl-*N,N*-dimethylnaphthalen-1-amine (2l)**

Brown oil (44.3 mg, 65% yield). <sup>1</sup>H NMR (400 MHz, CDCl<sub>3</sub>) δ 8.33–8.24 (m, 1H), 8.06–7.96 (m, 1H), 7.52–7.42 (m, 2H), 7.22 (d, *J* = 7.6 Hz, 1H), 7.00 (d, *J* = 7.6 Hz, 1H), 3.06–2.94 (m, 2H), 2.85 (s, 6H), 1.75–1.67 (m, 2H), 1.49–1.40 (m, 2H), 0.96 (t, *J* = 7.3 Hz, 3H). <sup>13</sup>C NMR (101 MHz, CDCl<sub>3</sub>) δ 149.3, 133.7, 133.0, 129.3, 125.7, 125.5, 124.8, 124.4, 113.8, 77.4, 77.1, 76.8, 45.4, 33.1, 32.7, 23.0, 14.1. IR (neat) 3068, 2954, 2931, 2861, 2827, 2782, 1663, 1583, 1458, 1391, 1296, 1185, 1044, 1002, 904, 830, 765 cm<sup>-1</sup>; HRMS (ESI) calcd for C<sub>16</sub>H<sub>22</sub>N: 228.1752. [M+H]<sup>+</sup>; found: 228.1742.

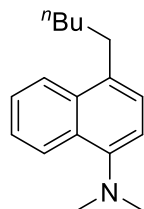

***N,N*-dimethyl-4-pentyl-naphthalen-1-amine (2m)**

Brown oil (47.1 mg, 65% yield). <sup>1</sup>H NMR (400 MHz, CDCl<sub>3</sub>) δ 8.30–8.27 (m, 1H), 8.06–7.96 (m, 1H), 7.52–7.41 (m, 2H), 7.21 (s, 1H), 7.00 (dd, *J* = 7.6, 2.0 Hz, 1H), 2.98 (t, *J* = 7.9 Hz, 2H), 2.85 (d, *J* = 2.1 Hz, 6H), 1.73 (t, *J* = 7.7 Hz, 2H), 1.49–1.30 (m, 4H), 0.93–0.89 (m, 3H). <sup>13</sup>C NMR (101 MHz, CDCl<sub>3</sub>) δ 149.3, 133.7, 133.0, 129.3, 125.6, 125.5, 124.8, 124.7, 124.4, 113.8, 77.4, 77.1, 76.7, 45.4, 32.9, 32.1, 30.7, 22.7, 14.2. IR (neat) 3068, 2954, 2859, 2782, 1667, 1583, 1503, 1459, 1390, 1303, 1188, 1120, 1095, 1046, 910, 828, 765, 719 cm<sup>-1</sup>; HRMS (ESI) calcd for C<sub>17</sub>H<sub>24</sub>N: 242.1909. [M+H]<sup>+</sup>; found: 242.1898.

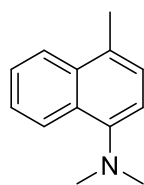

***N,N*-4-trimethylnaphthalen-1-amine (2n)<sup>[5]</sup>**

Brown oil (46.7 mg, 84% yield). <sup>1</sup>H NMR (400 MHz, CDCl<sub>3</sub>) δ 8.28–8.15 (m, 1H), 7.93–7.84 (m, 1H), 7.45–7.40 (m, 2H), 7.20–7.10 (m, 1H), 6.92 (dd, *J* = 7.5, 1.7 Hz, 1H), 2.80 (d, *J* = 1.8 Hz, 6H), 2.56 (d, *J* = 1.9 Hz, 3H). <sup>13</sup>C NMR (101 MHz, CDCl<sub>3</sub>) δ 133.7, 128.9, 126.3, 125.6, 125.0, 124.6, 124.5, 113.8, 77.4, 77.0, 76.7, 45.5, 19.2.

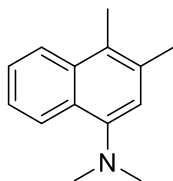

***N,N,3,4*-tetramethylnaphthalen-1-amine (2o)**

Brown oil (16.2 mg, 27% yield).  $^1\text{H}$  NMR (400 MHz,  $\text{CDCl}_3$ )  $\delta$  8.27–8.21 (m, 1H), 8.03–7.96 (m, 1H), 7.50–7.37 (m, 2H), 6.91 (s, 1H), 2.86 (s, 6H), 2.53 (s, 3H), 2.46 (s, 3H).  $^{13}\text{C}$  NMR (101 MHz,  $\text{CDCl}_3$ )  $\delta$  148.5, 134.0, 132.8, 127.6, 125.9, 125.7, 124.4, 124.1, 123.9, 117.5, 77.4, 77.1, 76.7, 45.4, 21.1, 14.3. IR (neat) 3069, 2935, 2864, 2826, 2781, 1732, 1594, 1516, 1454, 1411, 1387, 1285, 1265, 1189, 1145, 1097, 1042, 907, 859, 760, 739  $\text{cm}^{-1}$ ; HRMS (ESI) calcd for  $\text{C}_{14}\text{H}_{18}\text{N}$ : 200.1439.  $[\text{M}+\text{H}]^+$ ; found: 200.1431.

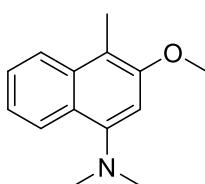

**3-methoxy-*N,N,4*-trimethylnaphthalen-1-amine (2p)**

Brown solid (55.5 mg, 86% yield) mp 55–57  $^{\circ}\text{C}$ .  $^1\text{H}$  NMR (400 MHz,  $\text{CDCl}_3$ )  $\delta$  8.20 (d,  $J = 8.5$  Hz, 1H), 7.93 (d,  $J = 8.5$  Hz, 1H), 7.48–7.44 (m, 1H), 7.36 (t,  $J = 7.6$  Hz, 1H), 6.91 (s, 1H), 3.94 (s, 3H), 2.90 (s, 6H), 2.49 (s, 3H).  $^{13}\text{C}$  NMR (101 MHz,  $\text{CDCl}_3$ )  $\delta$  154.4, 150.5, 134.6, 126.2, 124.7, 124.4, 123.9, 122.7, 114.3, 103.6, 77.3, 77.0, 76.7, 68.0, 57.1, 45.4, 10.3. IR (KBr) 3070, 2987, 2936, 2828, 2782, 1616, 1585, 1455, 1385, 1294, 1239, 1110, 1028, 906, 840, 756, 709  $\text{cm}^{-1}$ ; HRMS (ESI) calcd for  $\text{C}_{14}\text{H}_{18}\text{NO}$ : 216.1388.  $[\text{M}+\text{H}]^+$ ; found: 216.1379.

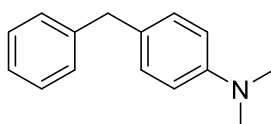

**4-benzyl-*N,N*-dimethylaniline (2q)<sup>[6]</sup>**

Yellow oil (11.4 mg, 21% yield).  $^1\text{H}$  NMR (400 MHz,  $\text{CDCl}_3$ )  $\delta$  7.21–7.15 (m, 2H), 7.10 (d,  $J = 7.2$  Hz, 3H), 6.98 (d,  $J = 8.5$  Hz, 2H), 6.61 (d,  $J = 8.5$  Hz, 2H), 3.81 (s, 2H), 2.82 (s, 6H).  $^{13}\text{C}$  NMR (101 MHz,  $\text{CDCl}_3$ )  $\delta$  149.2, 142.1, 129.6, 129.5, 128.8, 128.4, 125.8, 113.0, 77.4, 77.1, 76.7, 41.0, 40.9.

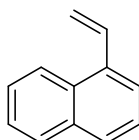

**1-vinylnaphthalene (2ib)<sup>[7]</sup>**

Colorless oil (8.4 mg, 18% yield).  $^1\text{H}$  NMR (400 MHz,  $\text{CDCl}_3$ )  $\delta$  8.16–8.06 (m, 1H), 7.87–7.79 (m, 1H), 7.77 (d,  $J = 8.2$  Hz, 1H), 7.66–7.58 (m, 1H), 7.57–7.38 (m, 4H), 5.78 (dd,  $J = 17.3, 1.6$

Hz, 1H), 5.46 (dd,  $J = 10.9, 1.6$  Hz, 1H).  $^{13}\text{C}$  NMR (101 MHz,  $\text{CDCl}_3$ )  $\delta$  135.7, 134.4, 133.6, 131.2, 128.6, 128.2, 126.1, 125.8, 125.7, 123.8, 123.7, 117.2, 77.4, 77.1, 76.8.

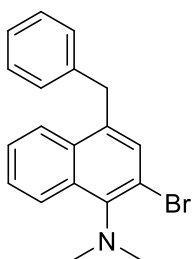

**4-benzyl-2-bromo-*N,N*-dimethylnaphthalen-1-amine (2ab)**

Colorless solid (65.1 mg, 64% yield) mp 56–58 °C.  $^1\text{H}$  NMR (400 MHz,  $\text{CDCl}_3$ )  $\delta$  8.36–8.30 (m, 1H), 7.90–7.87 (m, 1H), 7.47–7.37 (m, 2H), 7.35 (d,  $J = 0.9$  Hz, 1H), 7.27–7.19 (m, 2H), 7.17–7.12 (m, 3H), 4.29 (s, 2H), 2.99 (s, 6H).  $^{13}\text{C}$  NMR (101 MHz,  $\text{CDCl}_3$ )  $\delta$  146.1, 140.1, 135.9, 134.9, 132.5, 132.4, 128.8, 128.7, 126.4, 126.3, 126.2, 125.4, 124.8, 119.9, 77.5, 77.2, 76.9, 42.8, 38.6. IR (KBr) 3063, 2924, 2855, 2787, 1732, 1651, 1494, 1453, 1386, 1265, 1048, 960, 830, 757, 737, 699  $\text{cm}^{-1}$ ; HRMS (ESI) calcd for  $\text{C}_{19}\text{H}_{19}\text{BrN}$ : 340.0701.  $[\text{M}+\text{H}]^+$ ; found: 340.0694.

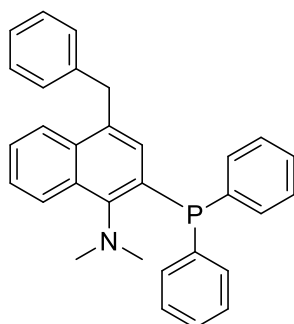

**4-benzyl-2-(diphenylphosphaneyl)-*N,N*-dimethylnaphthalen-1-amine (2ac)**

Yellowish oil (123.6 mg, 56% yield).  $^1\text{H}$  NMR (400 MHz,  $\text{CDCl}_3$ )  $\delta$  7.98 (dd,  $J = 19.4, 8.1$  Hz, 2H), 7.44–7.36 (m, 2H), 7.31–7.25 (m, 10H), 7.12 (dd,  $J = 19.4, 7.1$  Hz, 3H), 7.02 (d,  $J = 7.4$  Hz, 2H), 6.78 (d,  $J = 3.1$  Hz, 1H), 4.21 (s, 2H), 2.84 (s, 6H).  $^{13}\text{C}$  NMR (101 MHz,  $\text{CDCl}_3$ )  $\delta$  152.2, 152.0, 140.5, 138.9, 138.8, 135.9, 134.8, 134.2, 134.1, 133.9, 132.7, 131.4, 128.7, 128.6, 128.5, 128.4, 126.3, 126.1, 125.6, 125.5, 125.1, 125.0, 77.6, 77.2, 76.9, 44.3, 44.2, 39.3.  $^{31}\text{P}$  NMR (162 MHz,  $\text{CDCl}_3$ )  $\delta$  -14.12. IR (neat) 3064, 2926, 2855, 2784, 1735, 1643, 1492, 1454, 1380, 1282, 1177, 1049, 961, 744, 699  $\text{cm}^{-1}$ ; HRMS (ESI) calcd for  $\text{C}_{31}\text{H}_{29}\text{NP}$ : 446.2038.  $[\text{M}+\text{H}]^+$ ; found: 446.2032.

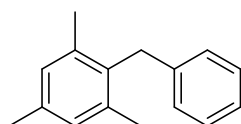

**2-benzyl-1,3,5-trimethylbenzene (5)<sup>[8]</sup>**

Colourless oil (195.6 mg, 93% yield).  $^1\text{H}$  NMR (400 MHz,  $\text{CDCl}_3$ )  $\delta$  7.19 (d,  $J = 7.7$  Hz, 2H), 7.17–7.07 (m, 1H), 7.07–6.95 (m, 2H), 6.88 (s, 2H), 4.00 (s, 2H), 2.28 (s, 3H), 2.19 (s, 6H).  $^{13}\text{C}$  NMR (101 MHz,  $\text{CDCl}_3$ )  $\delta$  140.2, 137.2, 135.8, 133.9, 129.0, 128.5, 128.0, 125.8, 77.5, 77.2, 76.9,

34.8, 21.1, 20.3.

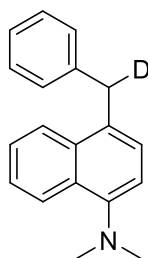

***N,N*-dimethyl-4-(phenylmethyl-*d*)naphthalen-1-amine (2a-*d*<sub>1</sub>)**

Yellowish oil (70.1 mg, 89% yield). <sup>1</sup>H NMR (400 MHz, CDCl<sub>3</sub>) δ 8.30–8.25 (m, 1H), 7.92 (dd, *J* = 8.2, 1.4 Hz, 1H), 7.47–7.34 (m, 2H), 7.25–7.10 (m, 6H), 6.97 (d, *J* = 7.6 Hz, 1H), 4.34 (s, 1H), 2.83 (s, 7H). <sup>13</sup>C NMR (101 MHz, CDCl<sub>3</sub>) δ 150.0, 141.1, 133.3, 131.3, 129.3, 128.8, 128.5, 128.4, 127.3, 126.0, 125.9, 124.9, 124.8, 124.7, 113.7, 77.4, 77.1, 76.8, 45.4, 38.9. IR (neat) 3062, 2979, 2862, 2827, 2783, 1731, 1581, 1512, 1494, 1453, 1391, 1306, 1188, 1144, 1013, 910, 826, 767, 713 cm<sup>-1</sup>; HRMS (ESI) calcd for C<sub>19</sub>H<sub>19</sub>DN: 263.1659. [M+H]<sup>+</sup>; found: 263.1650.

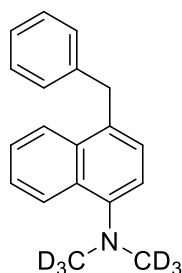

**4-benzyl-*N,N*-bis(methyl-*d*<sub>3</sub>)naphthalen-1-amine (2a-*d*<sub>6</sub>)**

Yellowish oil (77.0 mg, 96% yield). <sup>1</sup>H NMR (400 MHz, CDCl<sub>3</sub>) δ 8.19 (d, *J* = 8.2 Hz, 1H), 7.85 (d, *J* = 8.3 Hz, 1H), 7.43–7.26 (m, 2H), 7.17–7.13 (m, 2H), 7.12–7.02 (m, 4H), 6.89 (d, *J* = 7.6 Hz, 1H), 4.27 (s, 2H). <sup>13</sup>C NMR (101 MHz, CDCl<sub>3</sub>) δ 150.0, 141.1, 133.3, 131.3, 129.3, 128.8, 128.6, 128.5, 127.3, 126.0, 125.9, 125.0, 124.9, 124.8, 113.7, 77.4, 77.1, 76.8, 38.9. IR (neat) 3062, 3026, 2183, 2045, 1582, 1494, 1435, 1393, 1297, 1168, 1124, 1054, 965, 834, 766, 715 cm<sup>-1</sup>; HRMS (ESI) calcd for C<sub>19</sub>H<sub>14</sub>D<sub>6</sub>N: 268.1972 [M+H]<sup>+</sup>; found: 268.1967.

## 10. References.

- [1] Zhang S., Wang Y., Feng X., and Bao M. *J. Am. Chem. Soc.* **2012**, 134(12), 5492–5495.
- [2] Boldrini C., Reis M. C., Harutyunyan S. R., *J. Org. Chem.* **2022**, 87(19), 12772–12782.
- [3] Iwamoto H., Endo K., Ozawa Y., Watanabe Y., Kubota K., Imamoto T., and Ito H. *Angew. Chem. Int. Ed.* **2019**, 58(32), 11112–11117.
- [4] Peng B., Zhang S., Yu X., Feng X., and Bao M. *Org. Lett.* **2011**, 13(19), 5402–5405.
- [5] Xu Y.; Zhu M.; Lin Y.; Tian S., *Org. Lett.* **2019**, 21(17), 7169–7173.
- [6] Sun Z., Ji R., Wu J., Zhao J., Fang F., Wang F., Jiang C., and Liu Z. *Adv. Synth. Catal.* **2023**, 365(4), 476–481.
- [7] Gao Y., Ou Y., and Gooßen L. J. *Chem. Eur. J.* **2019**, 25(37), 8709–8712.
- [8] Yu W., Wan J., Chen P., Zhao K., Huang H., Wang T., and Luo J. *Synthetic Commun.* **2023**, 53(6), 511–518.

## 11. Copies of $^1\text{H}$ , $^{13}\text{C}$ , $^{19}\text{F}$ , $^{31}\text{P}$ NMR and HMBC Spectra

### 1-(chloro(phenyl)methyl)naphthalene (**1a**)

$^1\text{H}$  NMR, 400 MHz,  $\text{CDCl}_3$

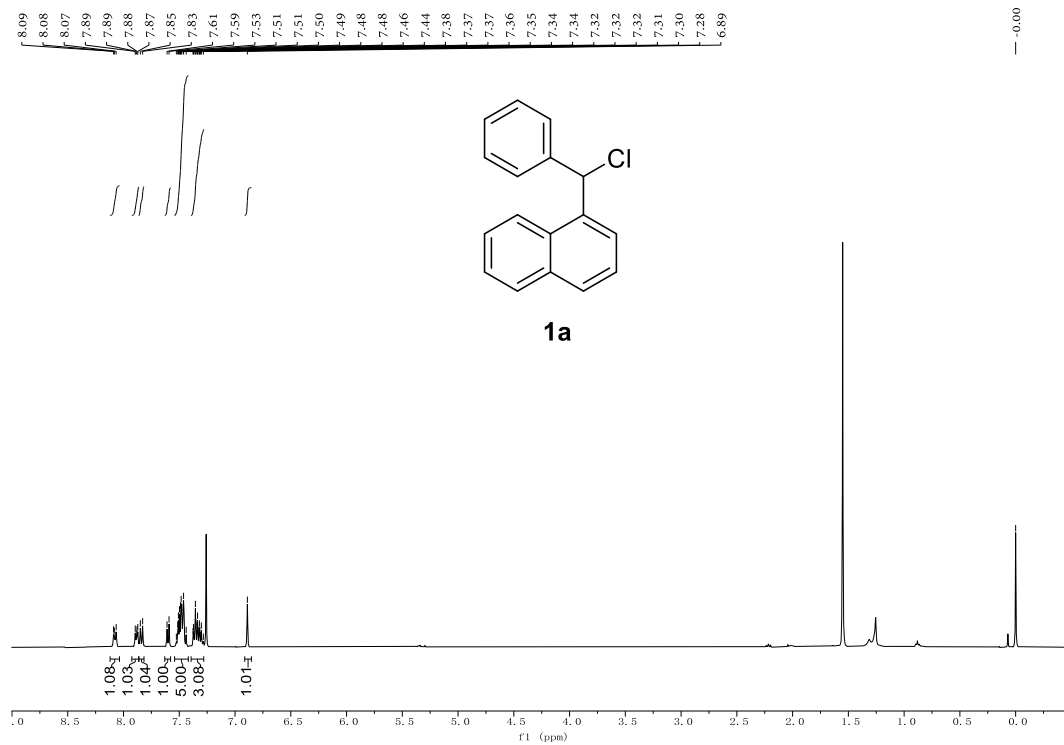

### 1-(chloro(*p*-tolyl)methyl)naphthalene (**1b**)

$^1\text{H}$  NMR, 400 MHz,  $\text{CDCl}_3$

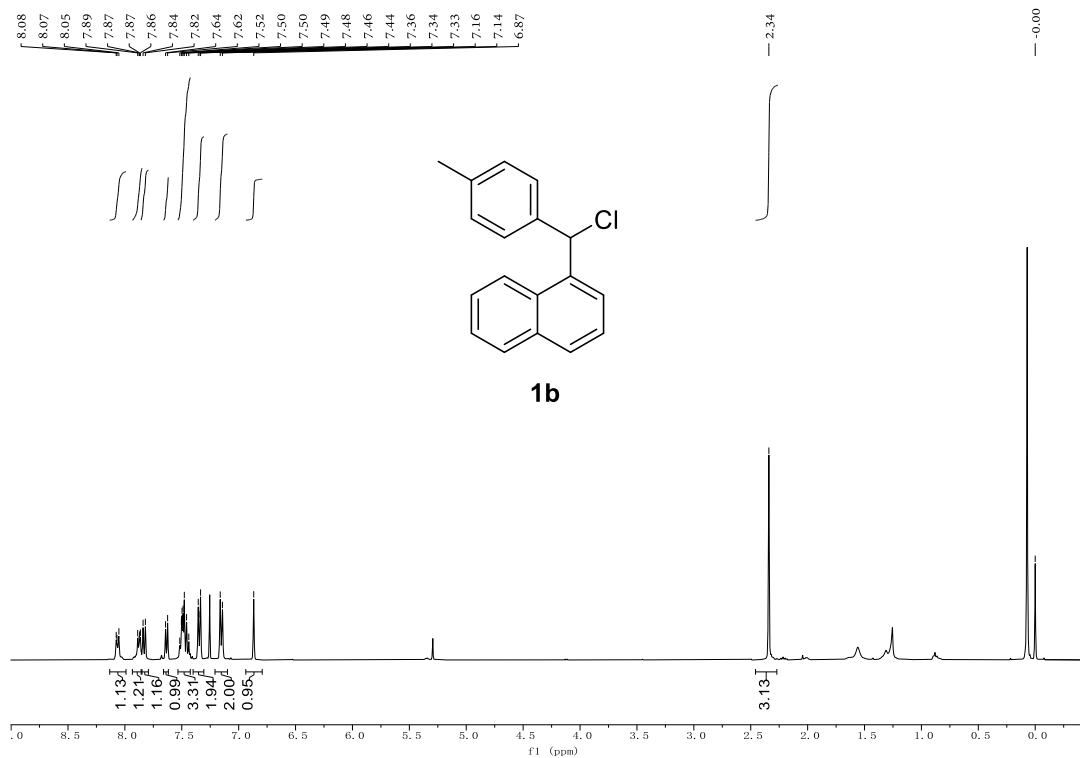

1-(chloro(*o*-tolyl)methyl)naphthalene (**1c**)

$^1\text{H}$  NMR, 400 MHz,  $\text{CDCl}_3$

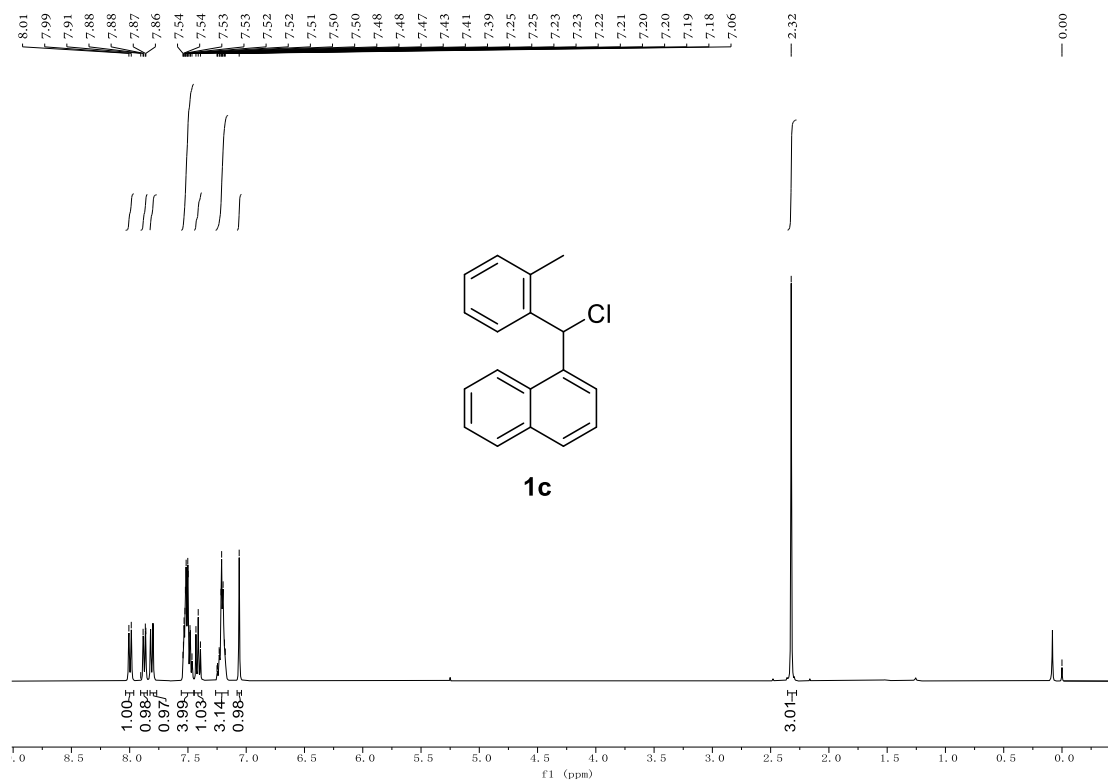

$^{13}\text{C}\{^1\text{H}\}$  NMR, 101 MHz,  $\text{CDCl}_3$

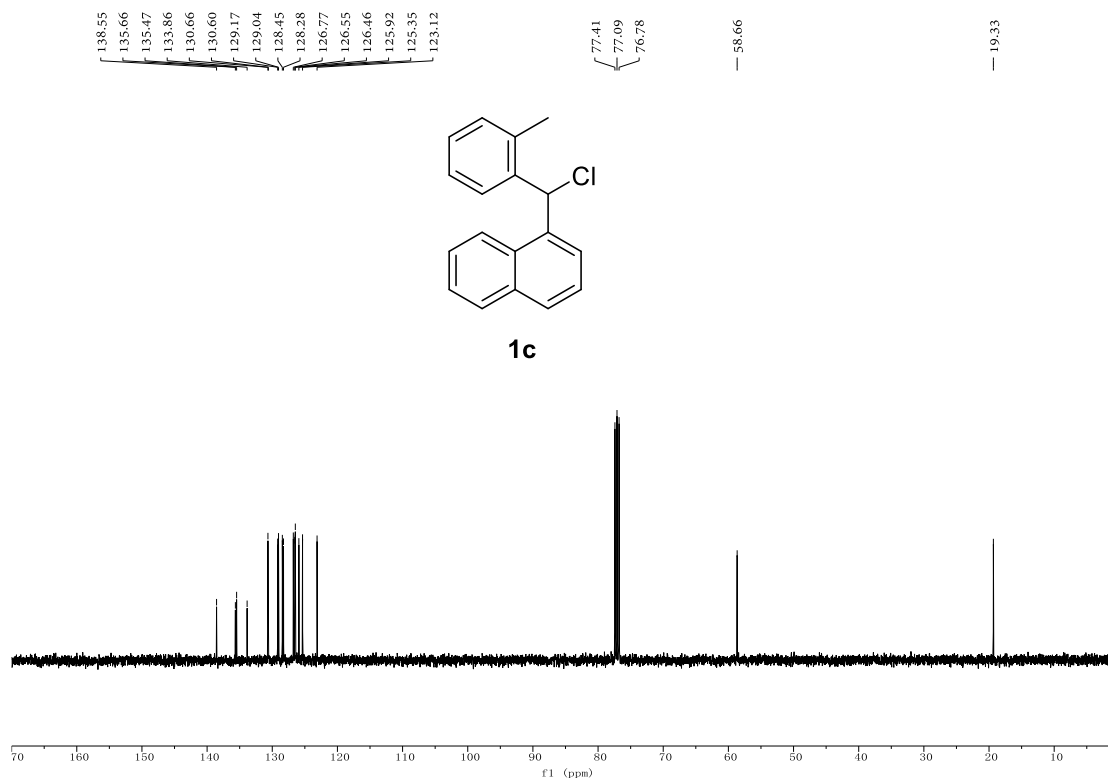



1-(chloro(3,4-dimethylphenyl)methyl)naphthalene (**1d**)

$^1\text{H}$  NMR, 400 MHz,  $\text{CDCl}_3$

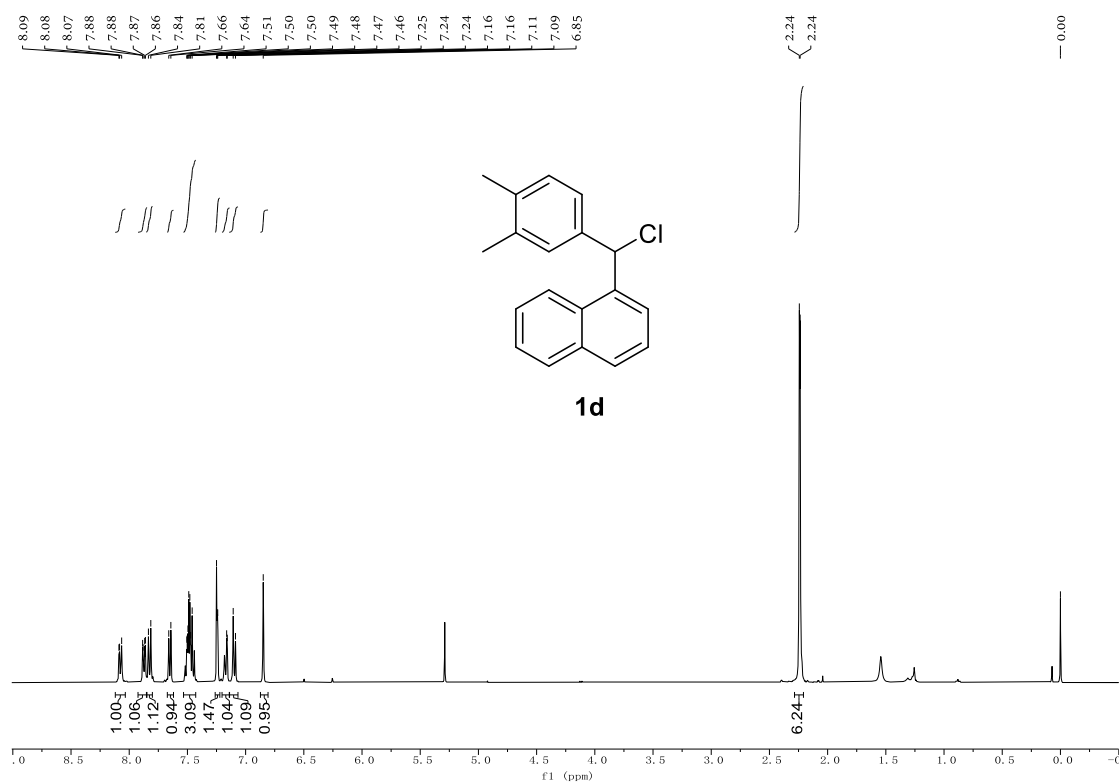

$^{13}\text{C}\{^1\text{H}\}$  NMR, 101 MHz,  $\text{CDCl}_3$

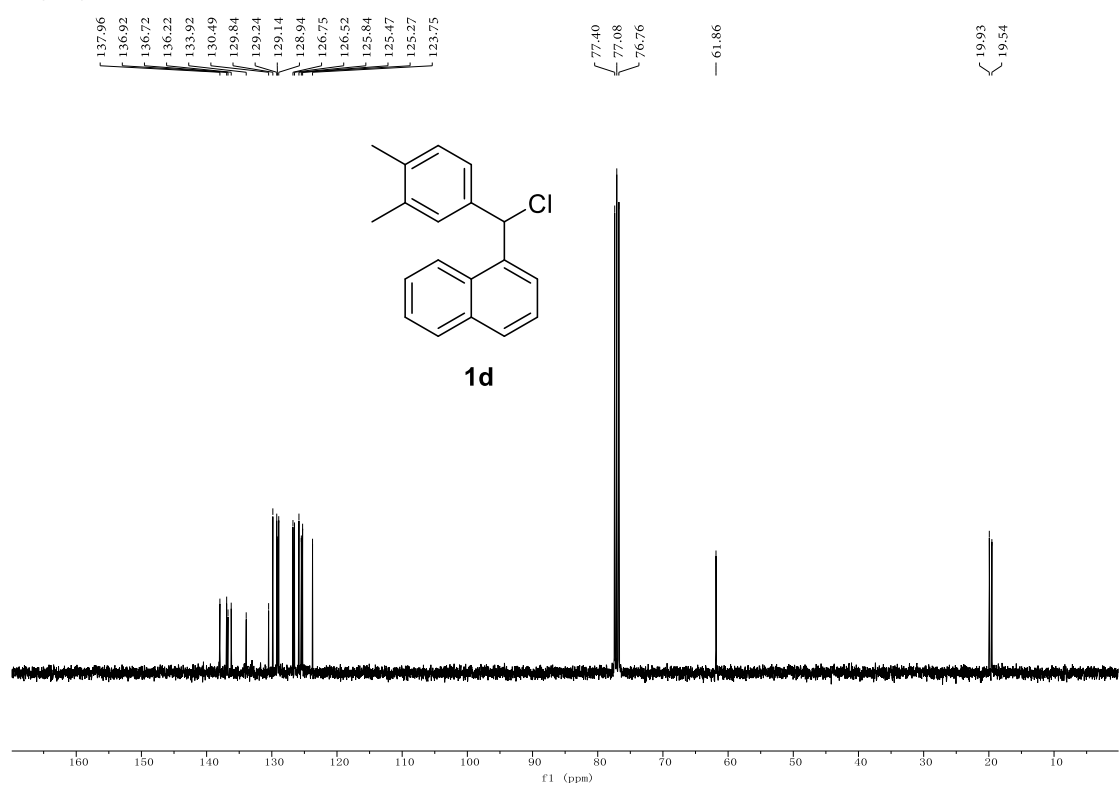

# 1-(chloro(4-fluorophenyl)methyl)naphthalene (**1e**)

$^1\text{H}$  NMR, 400 MHz,  $\text{CDCl}_3$

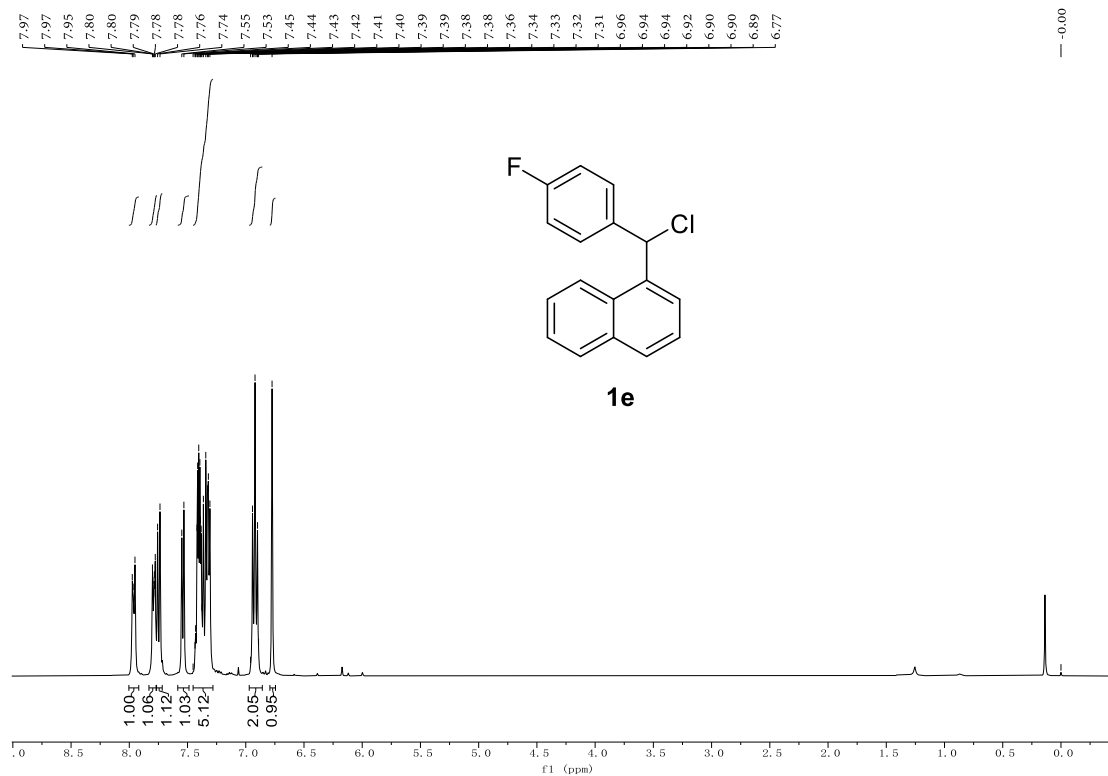

$^{13}\text{C}\{^1\text{H}\}$  NMR, 101 MHz,  $\text{CDCl}_3$

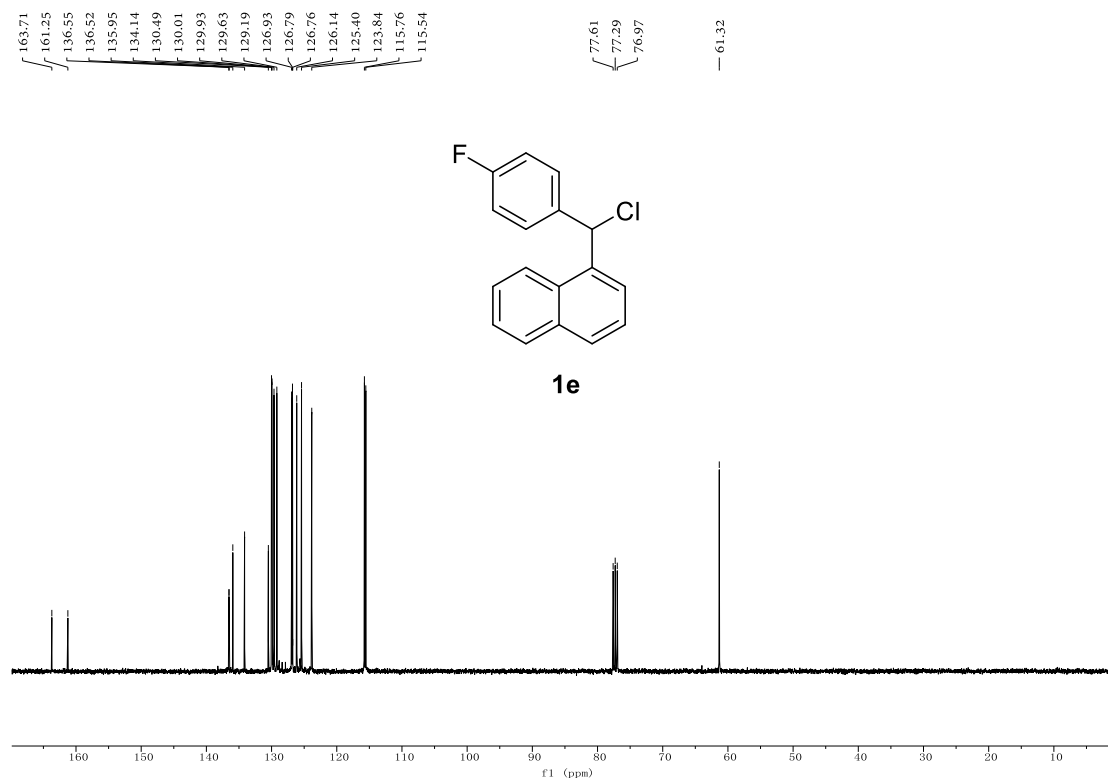

$^{19}\text{F}$  NMR, 376 MHz,  $\text{CDCl}_3$

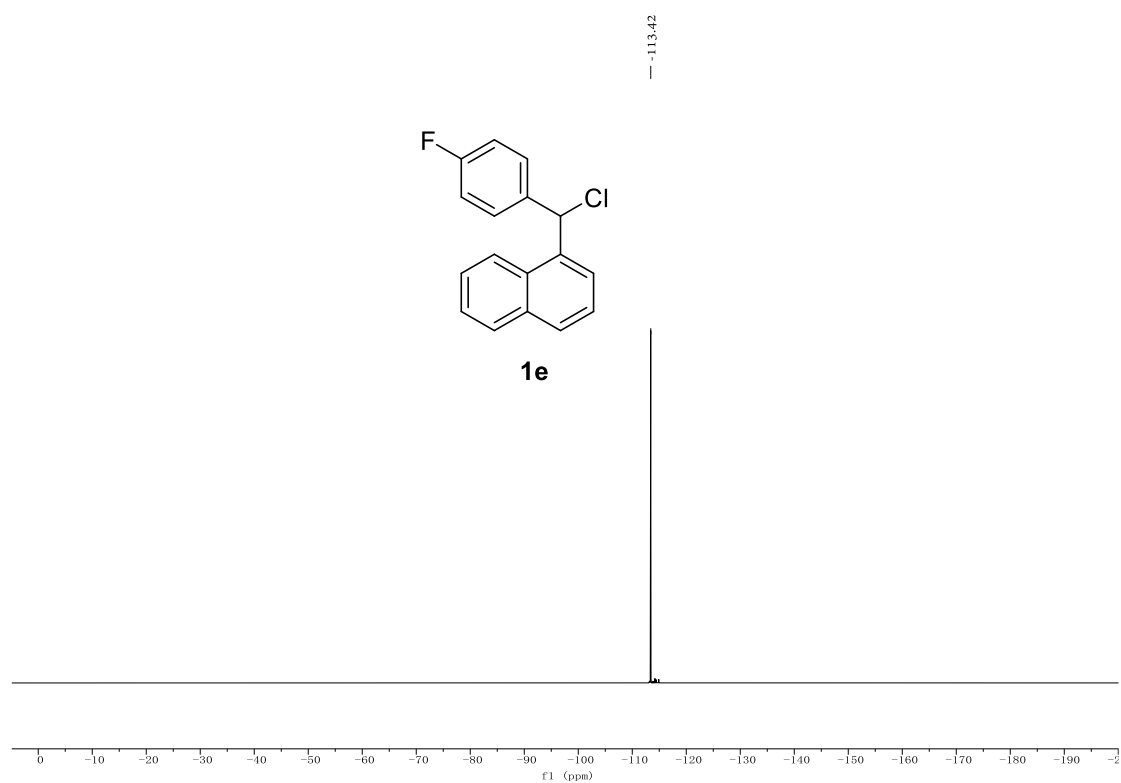

1-(chloro(4-chlorophenyl)methyl)naphthalene (**1f**)

$^1\text{H}$  NMR, 400 MHz,  $\text{CDCl}_3$

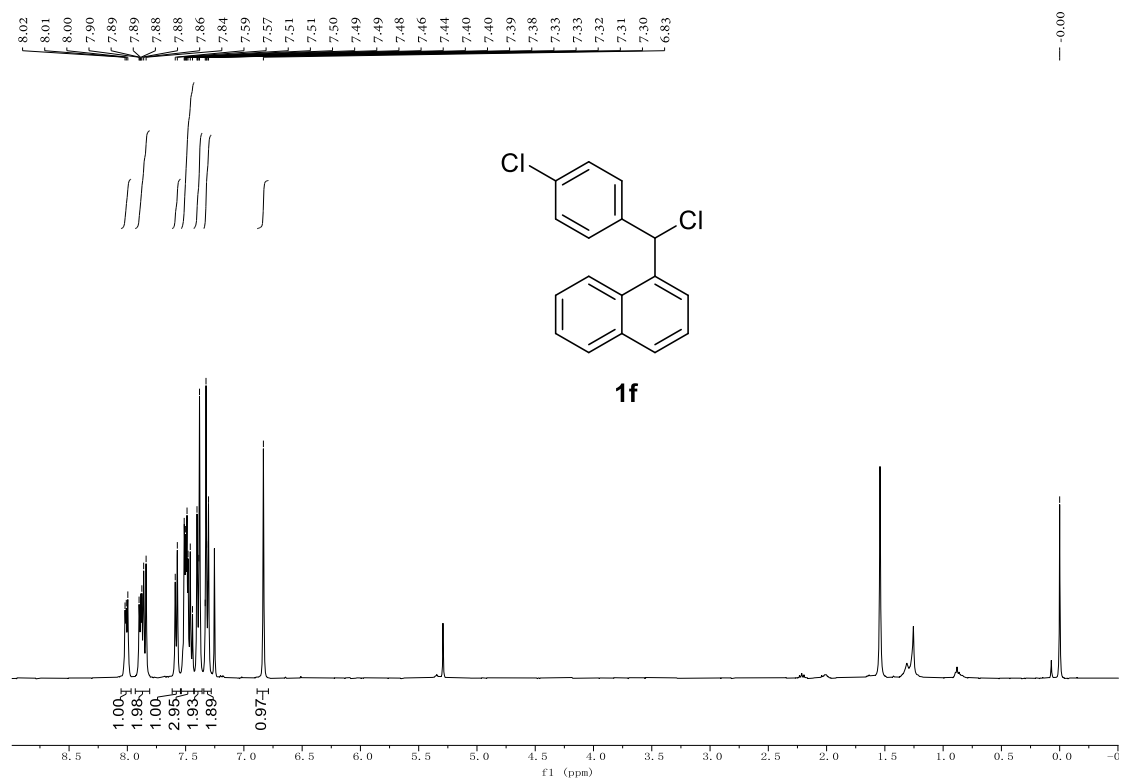

$^{13}\text{C}\{^1\text{H}\}$  NMR, 101 MHz,  $\text{CDCl}_3$

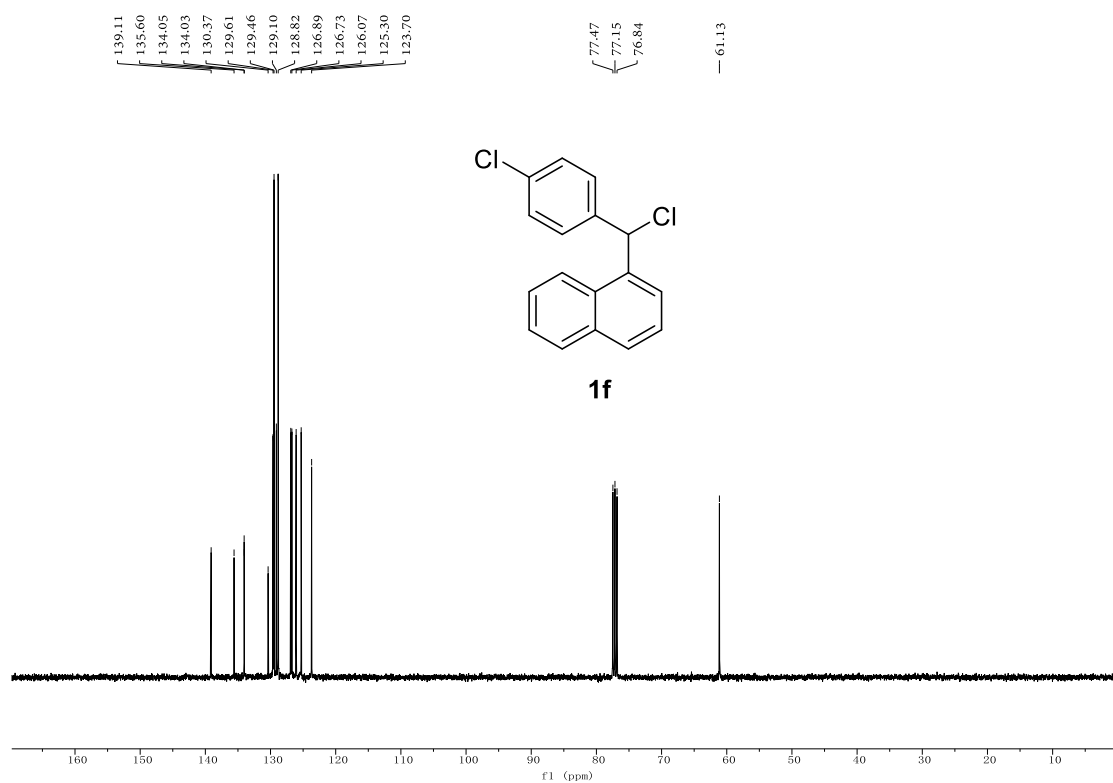

1-(chloro(2-fluoro-5-(trifluoromethyl)phenyl)methyl)naphthalene (**1g**)

$^1\text{H}$  NMR, 400 MHz,  $\text{CDCl}_3$

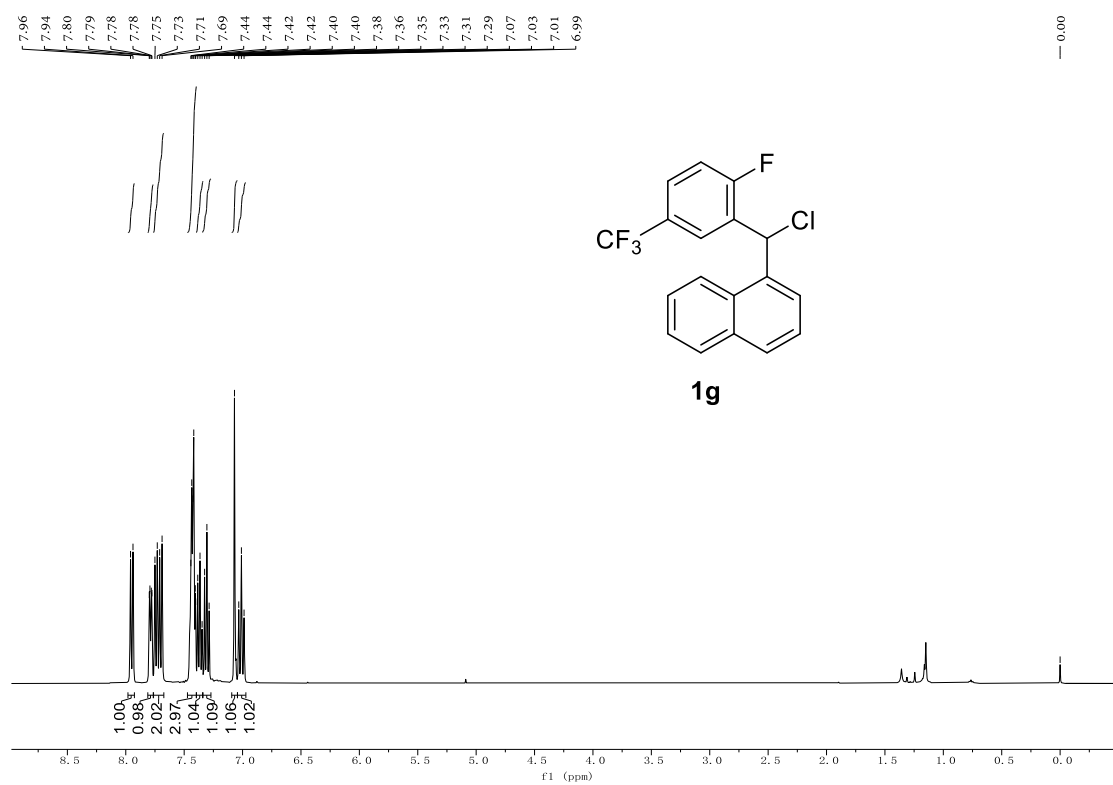

$^{13}\text{C}\{^1\text{H}\}$  NMR, 101 MHz,  $\text{CDCl}_3$

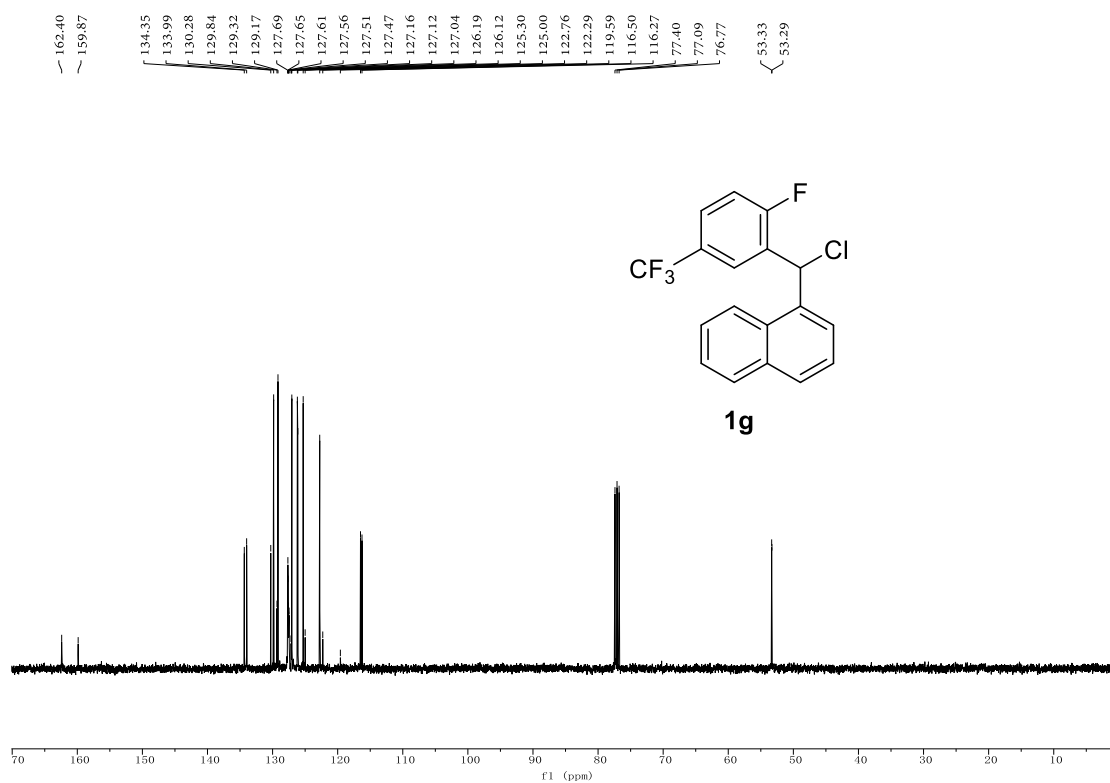

$^{19}\text{F}$  NMR, 376 MHz,  $\text{CDCl}_3$

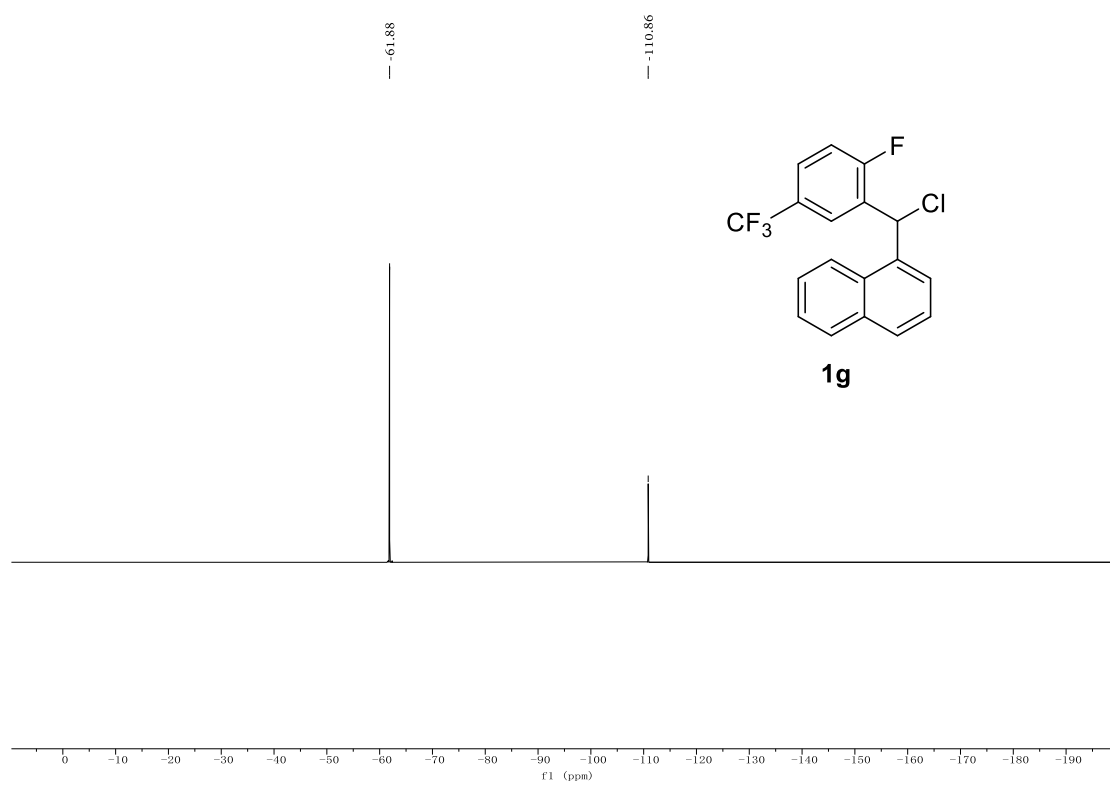

4-(chloro(naphthalen-1-yl)methyl)-*N,N*-diethylbenzamide (**1h**)

$^1\text{H}$  NMR, 400 MHz,  $\text{CDCl}_3$

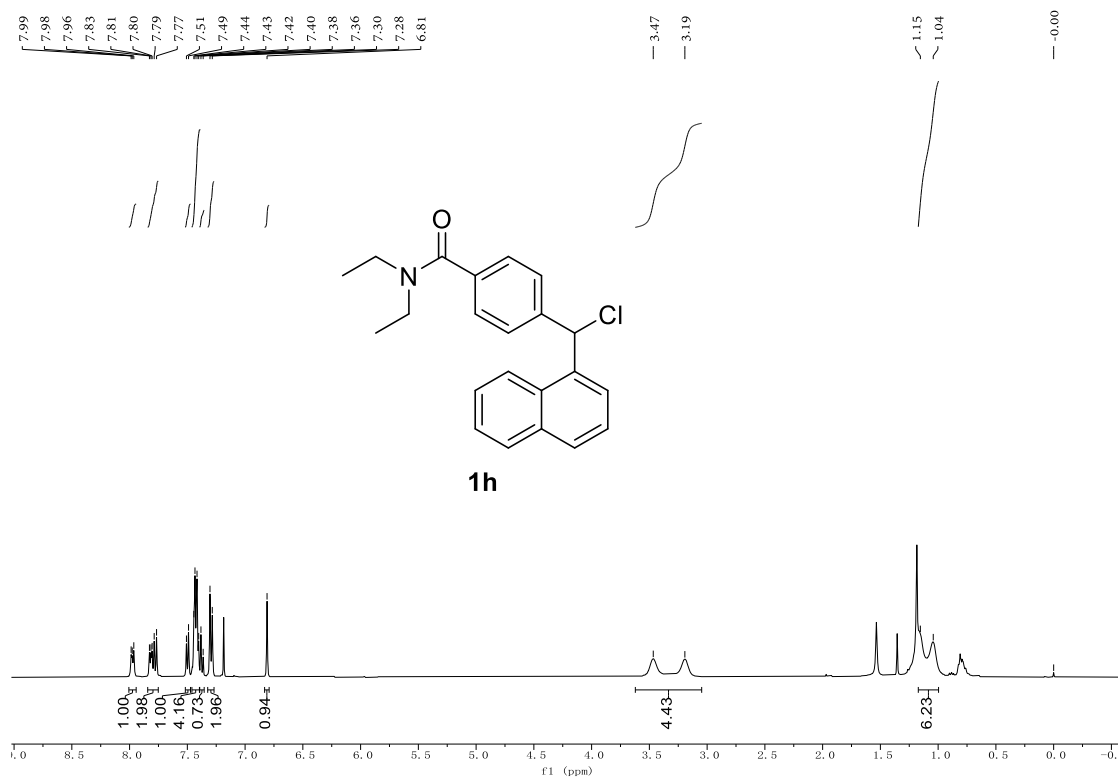

$^{13}\text{C}\{^1\text{H}\}$  NMR, 101 MHz,  $\text{CDCl}_3$

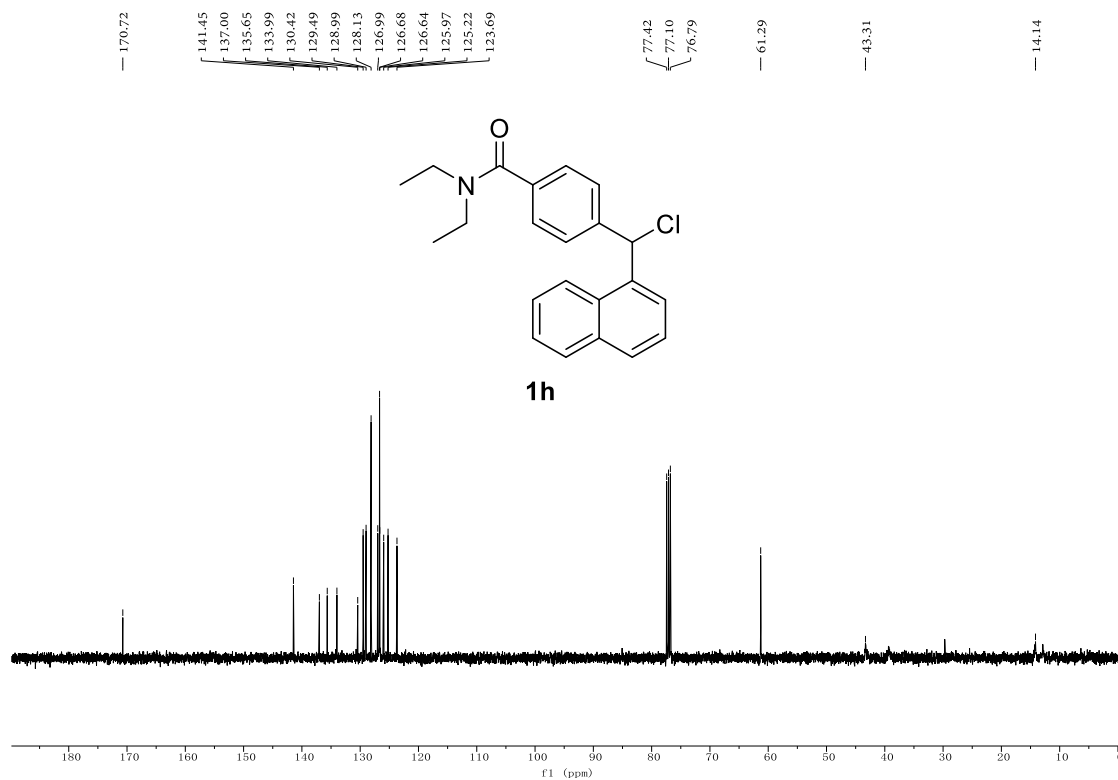

### 1-(1-chloroethyl)naphthalene (**1i**)

<sup>1</sup>H NMR, 400 MHz, CDCl<sub>3</sub>

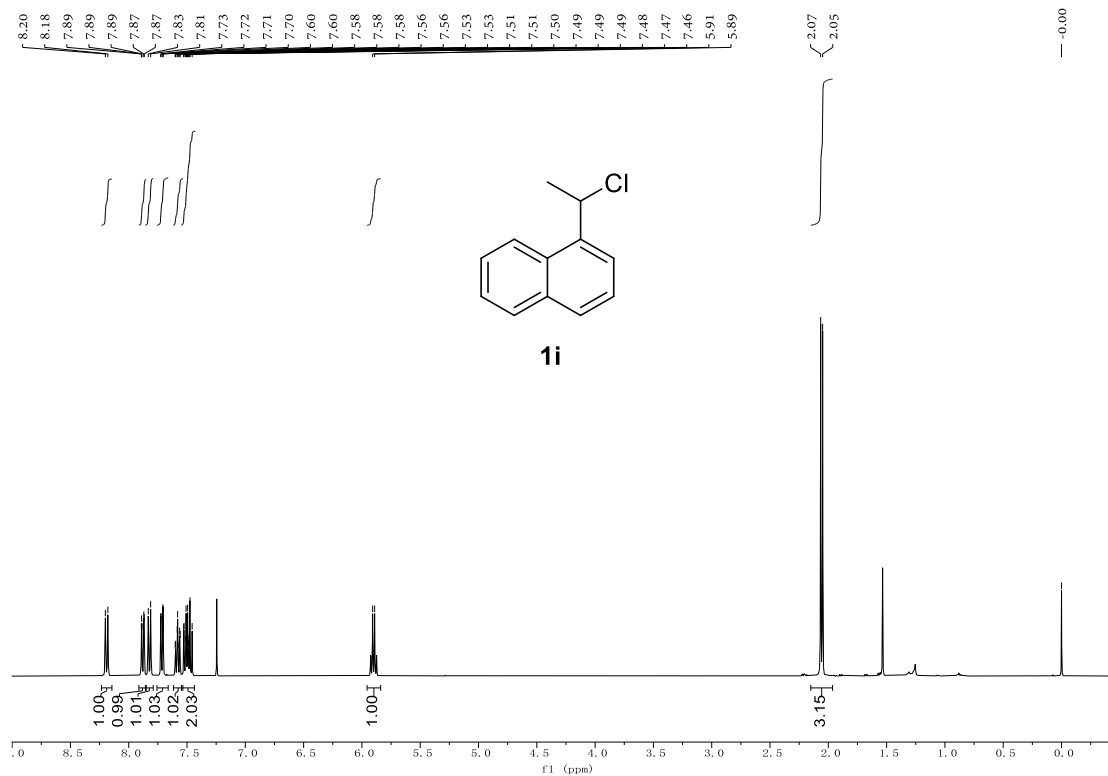

### 1-(1-chloropropyl)naphthalene (**1j**)

<sup>1</sup>H NMR, 400 MHz, CDCl<sub>3</sub>

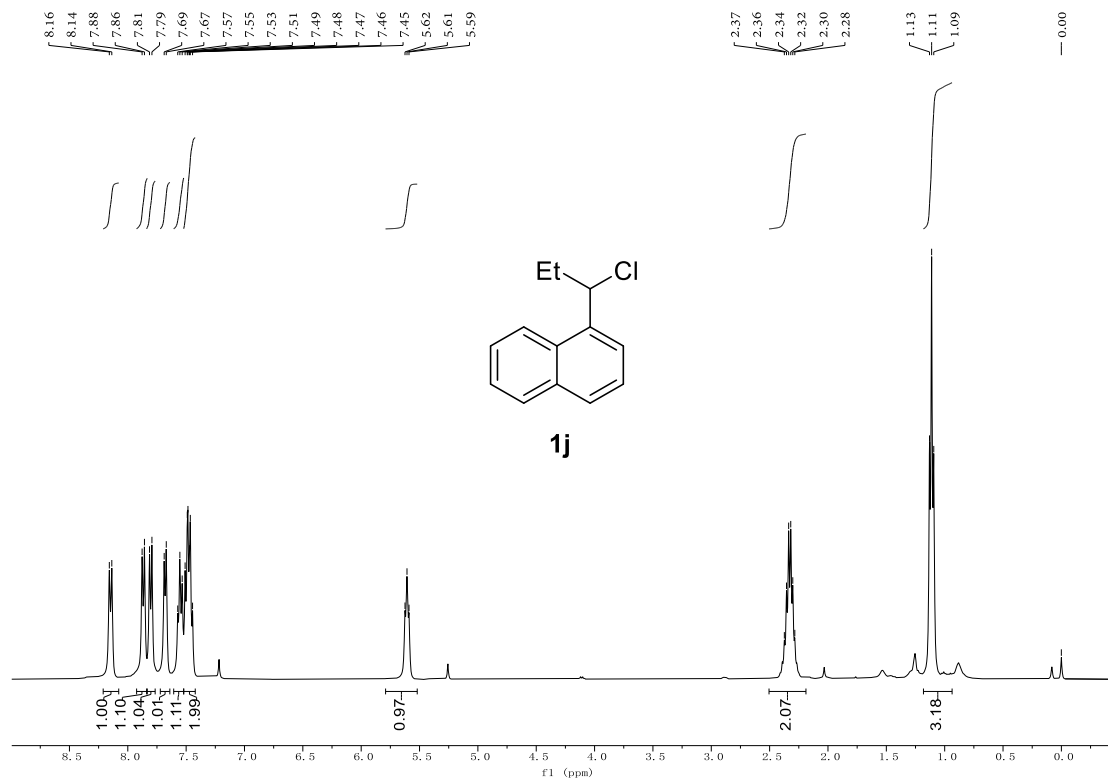

### 1-(1-chloro-2-methylpropyl)naphthalene (**1k**)

<sup>1</sup>H NMR, 400 MHz, CDCl<sub>3</sub>

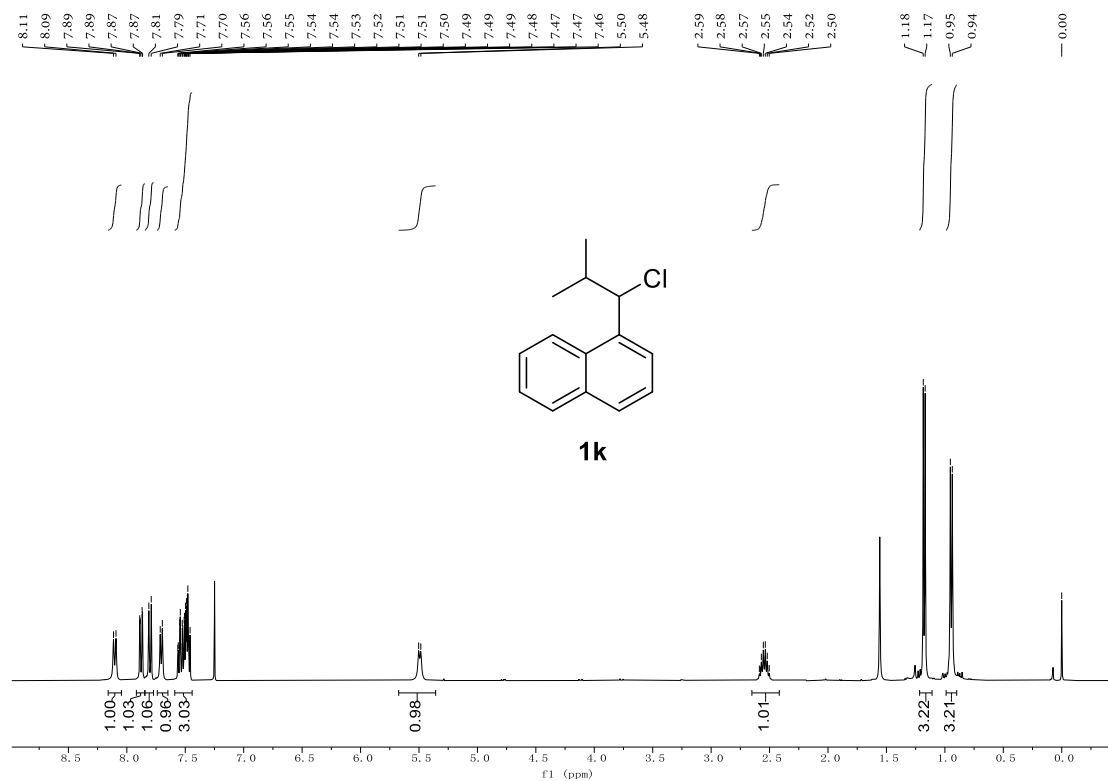

### 1-(1-chlorobutyl)naphthalene (**1l**)

<sup>1</sup>H NMR, 400 MHz, CDCl<sub>3</sub>

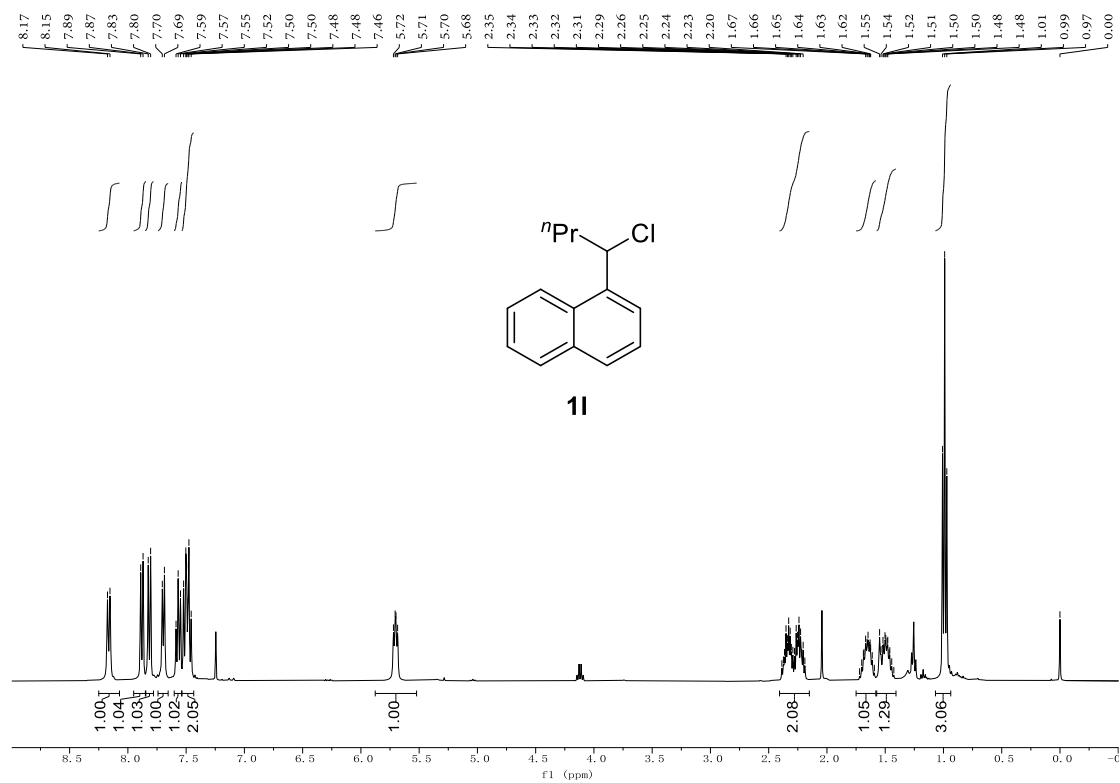





$^{13}\text{C}\{^1\text{H}\}$  NMR, 101 MHz,  $\text{CDCl}_3$

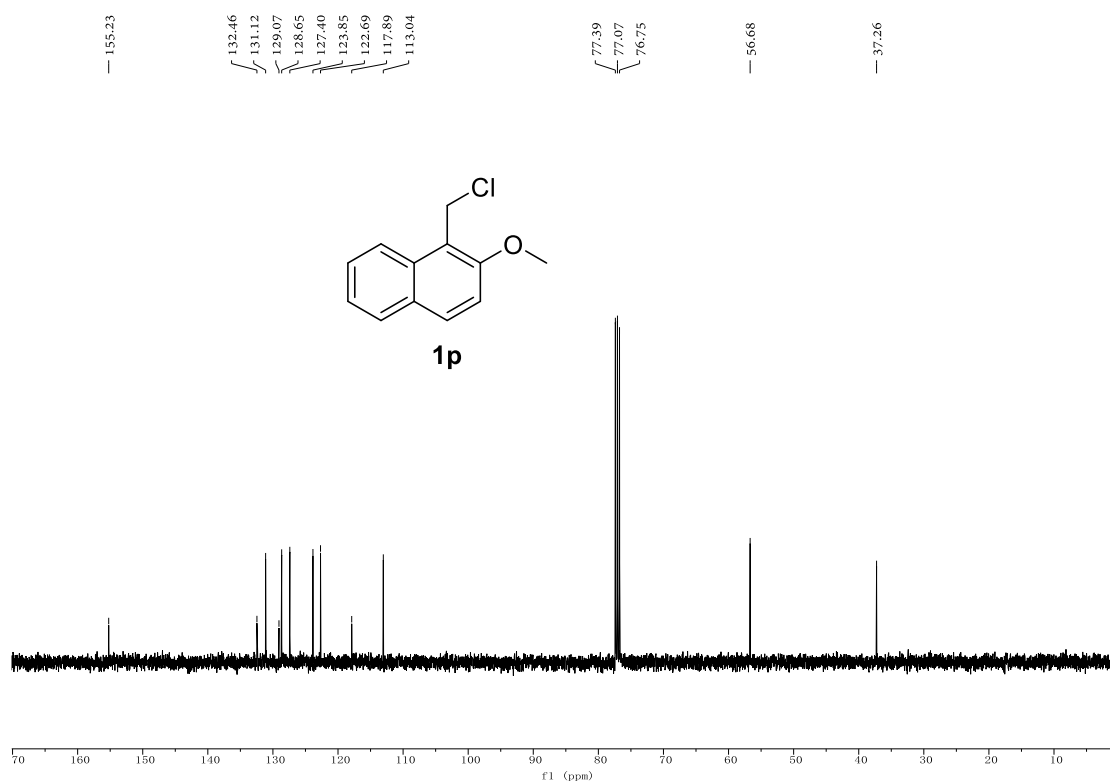

1-(chloromethyl)-4-methylnaphthalene (**1r**)

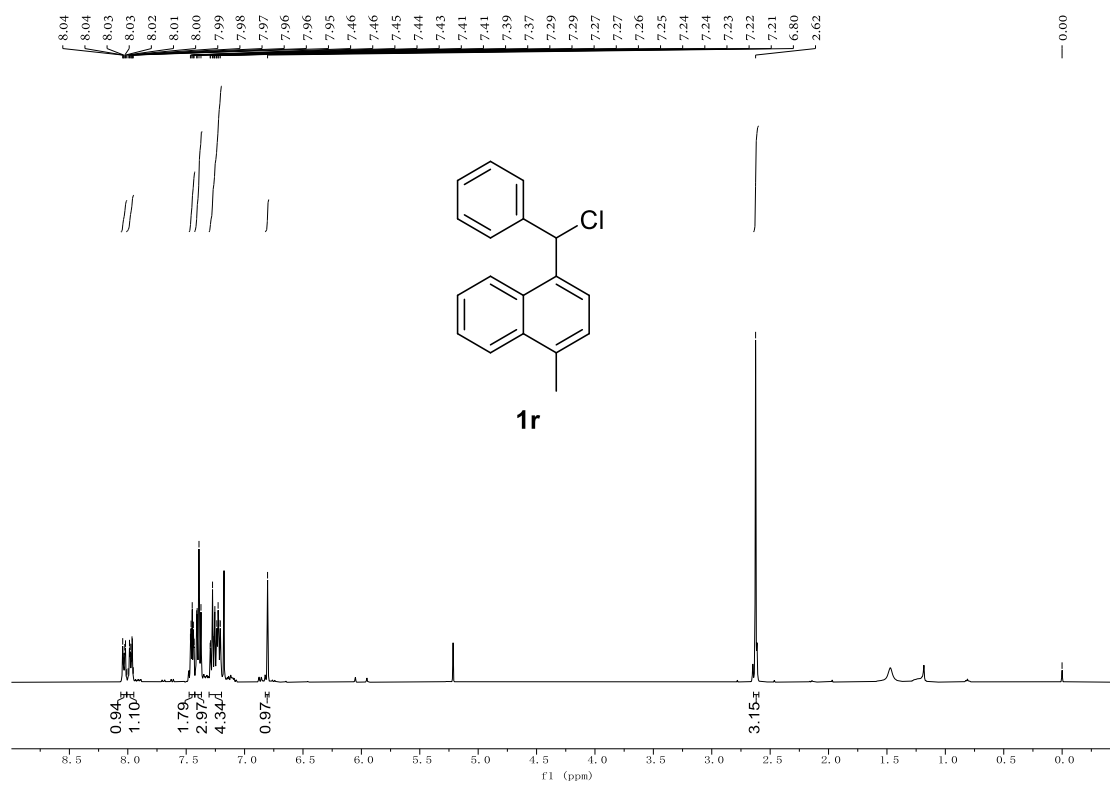

1-(chloro(phenyl)methyl)naphthalene-4-*d* (**1a-d<sub>1</sub>**)

<sup>1</sup>H NMR, 400 MHz, CDCl<sub>3</sub>

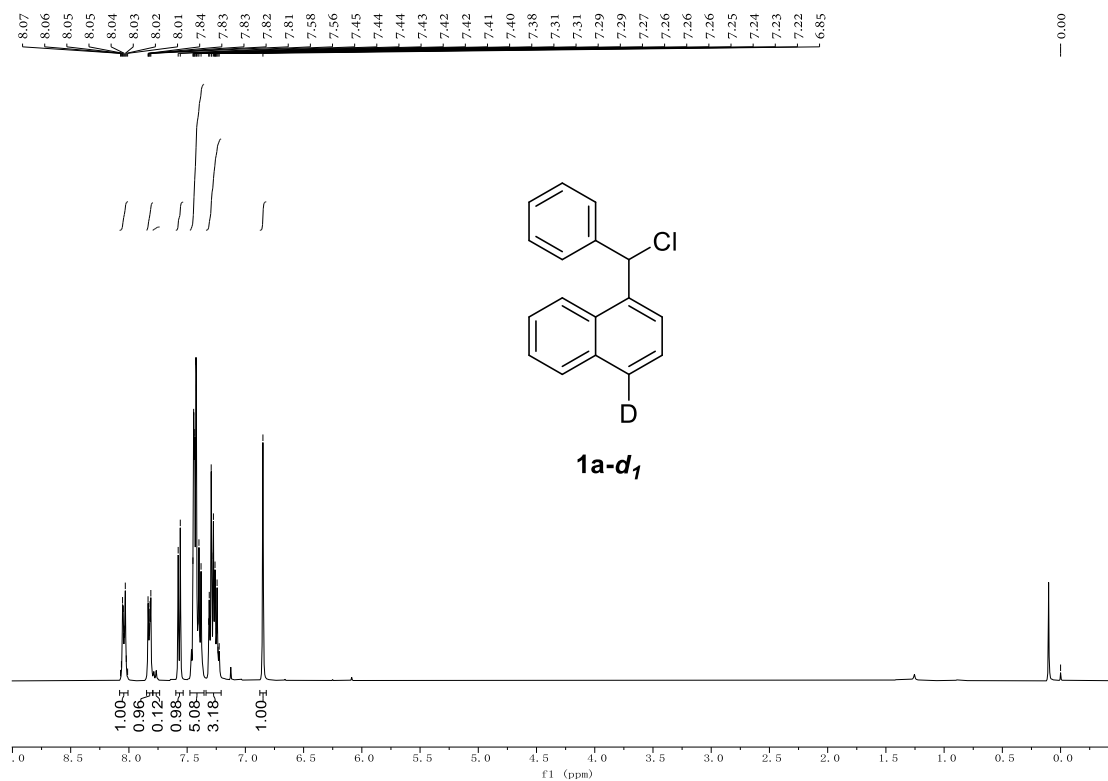

<sup>13</sup>C{<sup>1</sup>H} NMR, 101 MHz, CDCl<sub>3</sub>

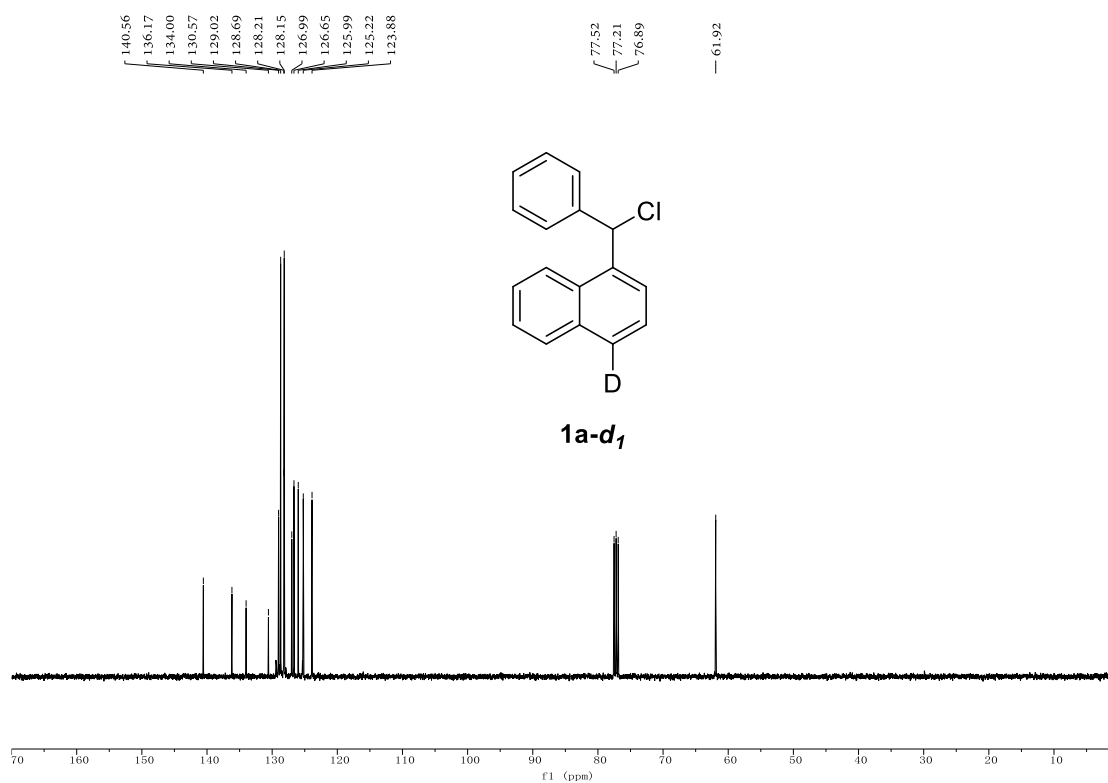

4-benzyl-*N,N*-dimethylnaphthalen-1-amine (**2a**)

$^1\text{H}$  NMR, 400 MHz,  $\text{CDCl}_3$

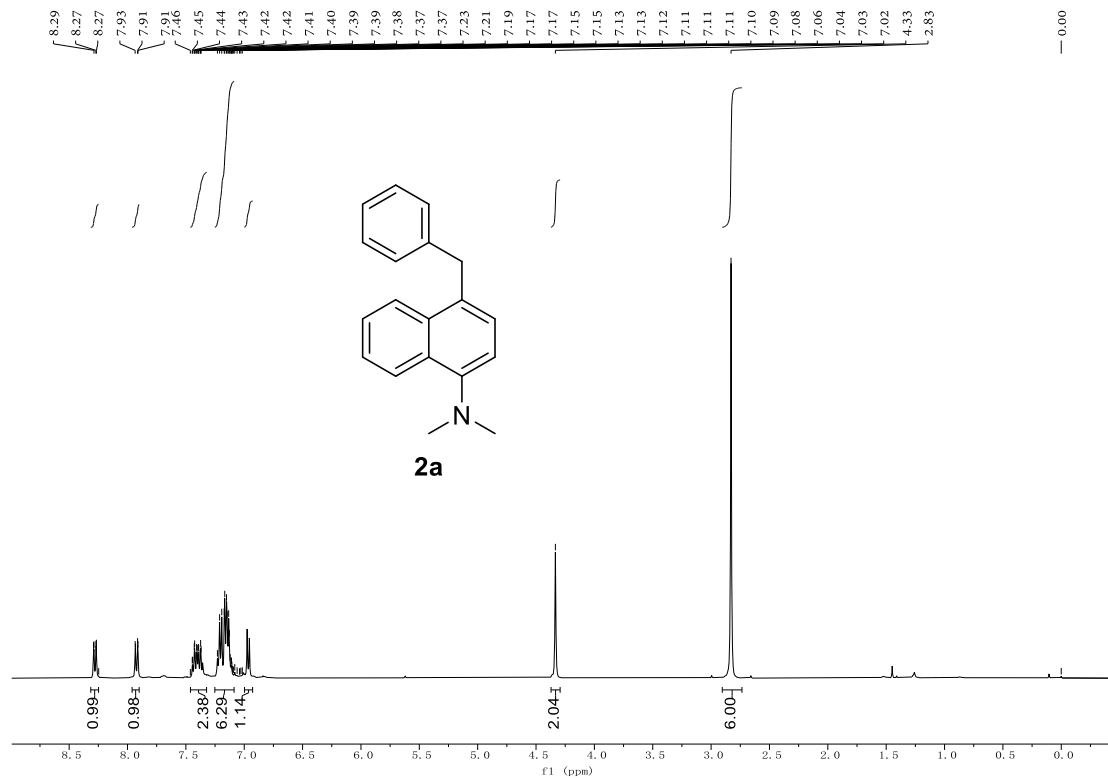

$^{13}\text{C}\{^1\text{H}\}$  NMR, 101 MHz,  $\text{CDCl}_3$

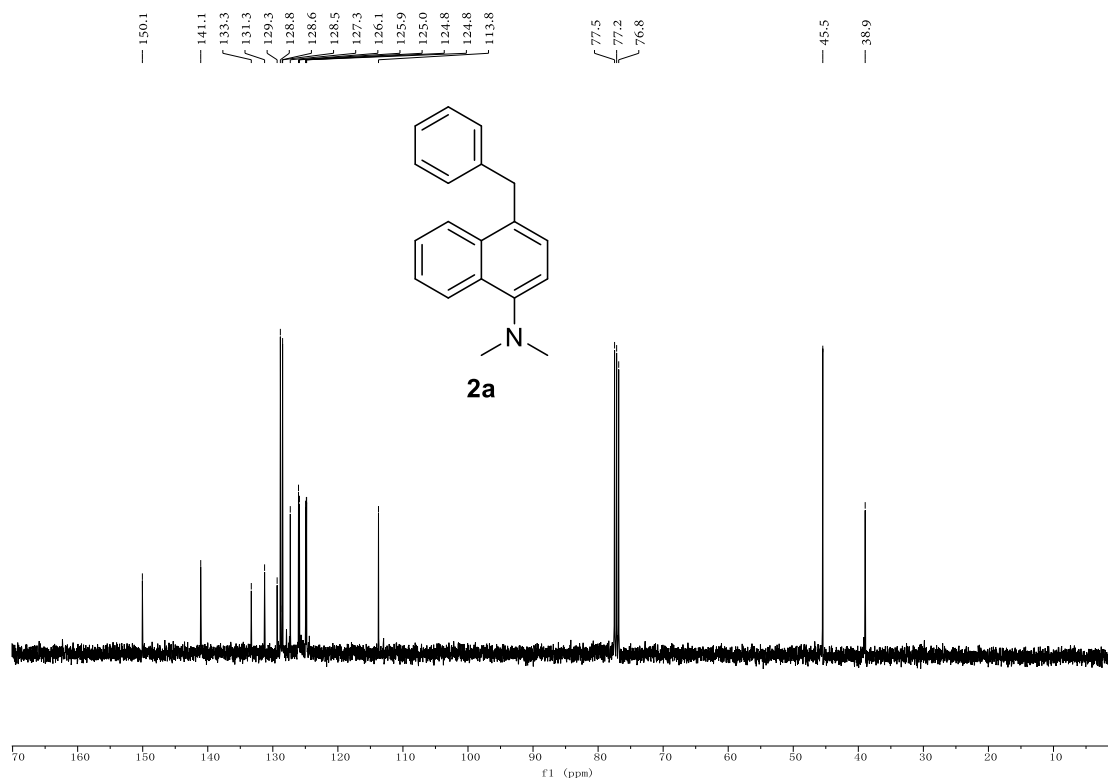

HMBC spectrum

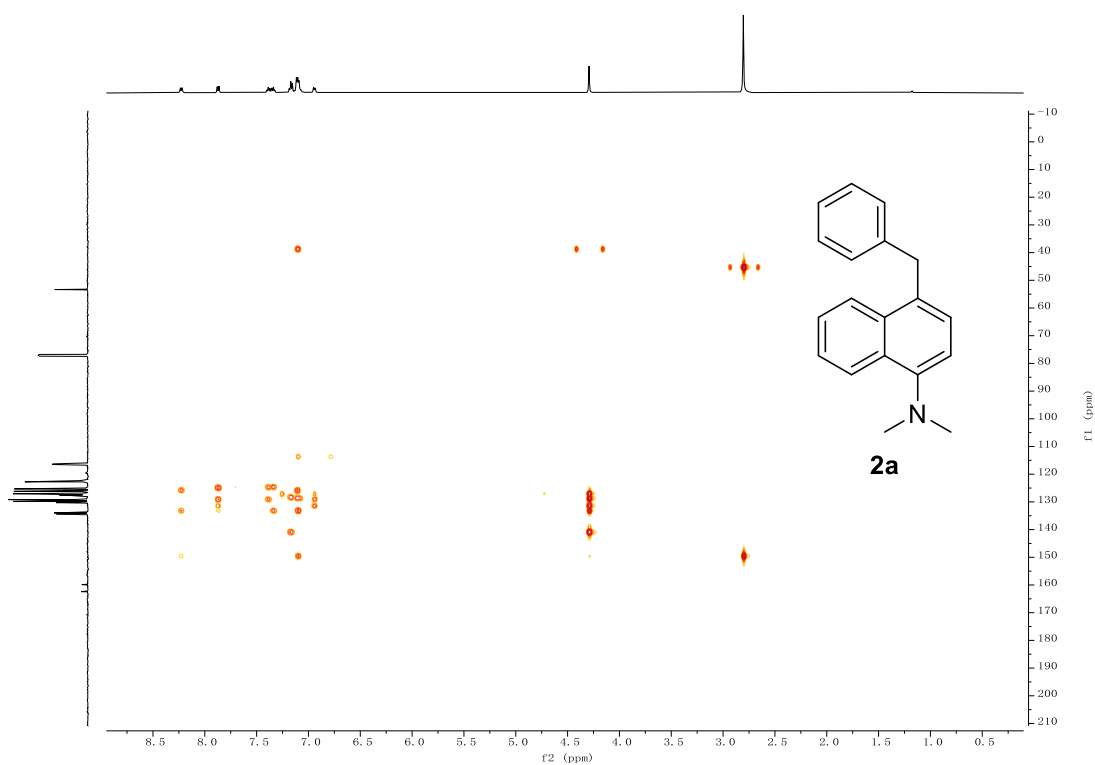

*N,N*-dimethyl-4-(4-methylbenzyl)naphthalen-1-amine (**2b**)

<sup>1</sup>H NMR, 400 MHz, CDCl<sub>3</sub>

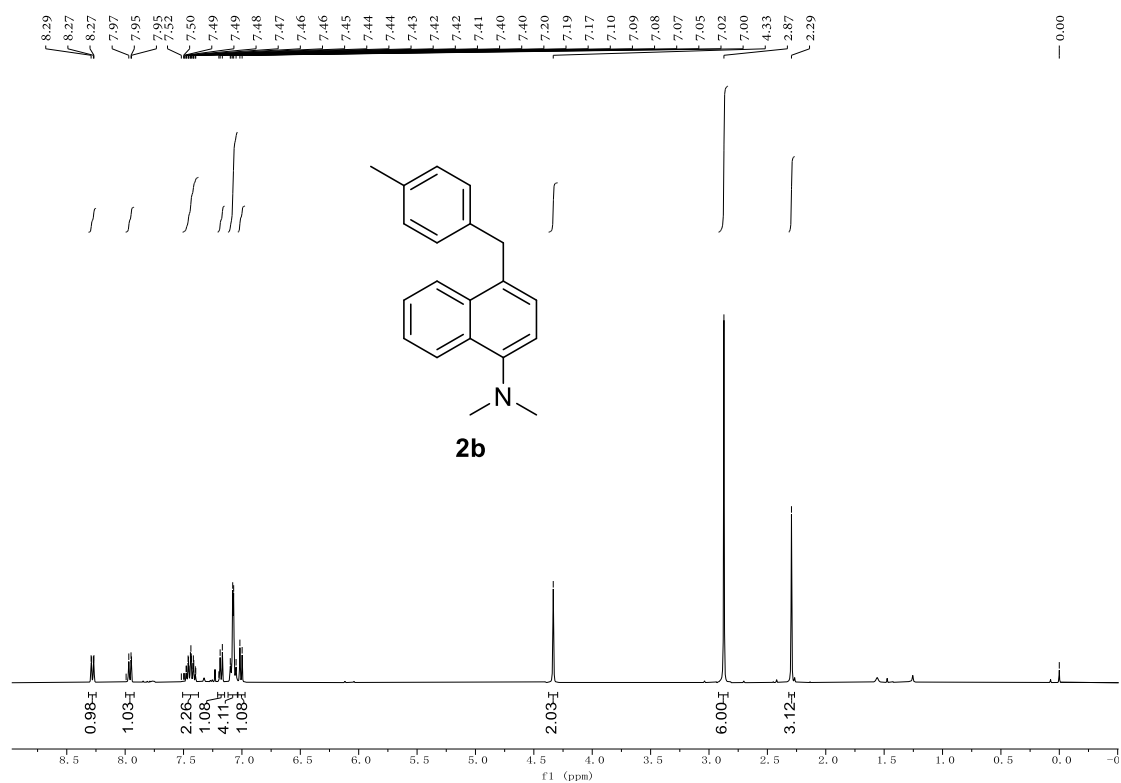

$^{13}\text{C}\{^1\text{H}\}$  NMR, 101 MHz,  $\text{CDCl}_3$

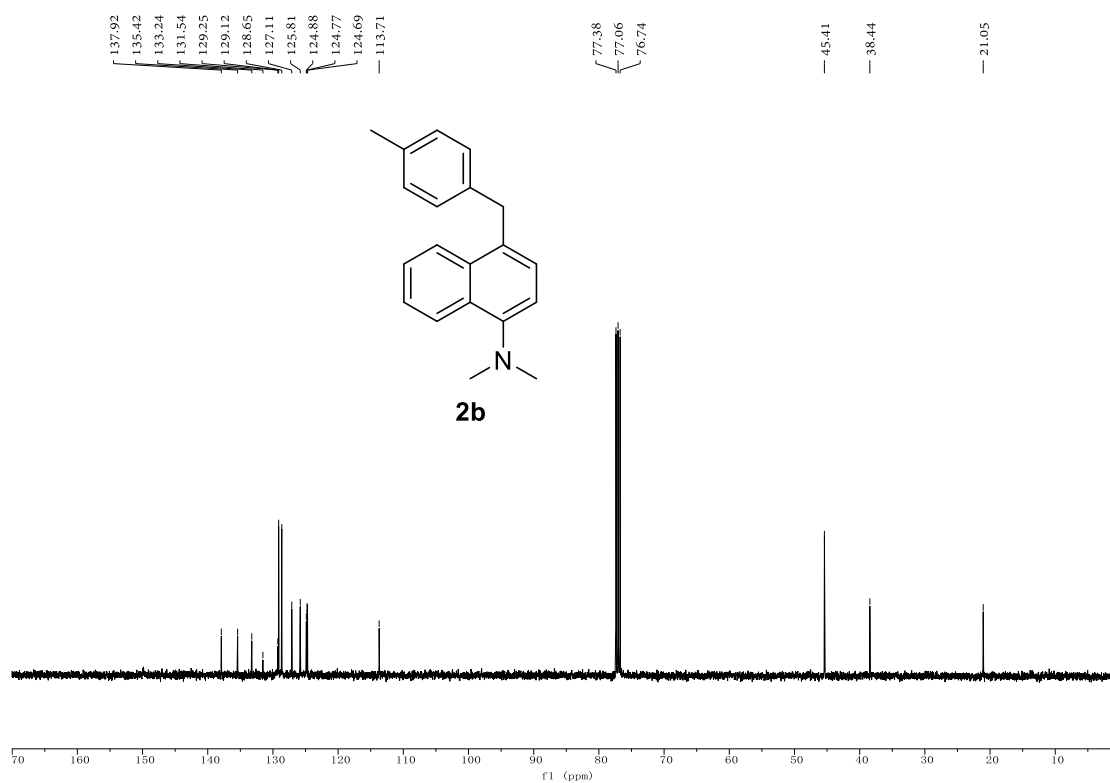

*N,N*-dimethyl-4-(2-methylbenzyl)naphthalen-1-amine (**2c**)

$^1\text{H}$  NMR, 400 MHz,  $\text{CDCl}_3$

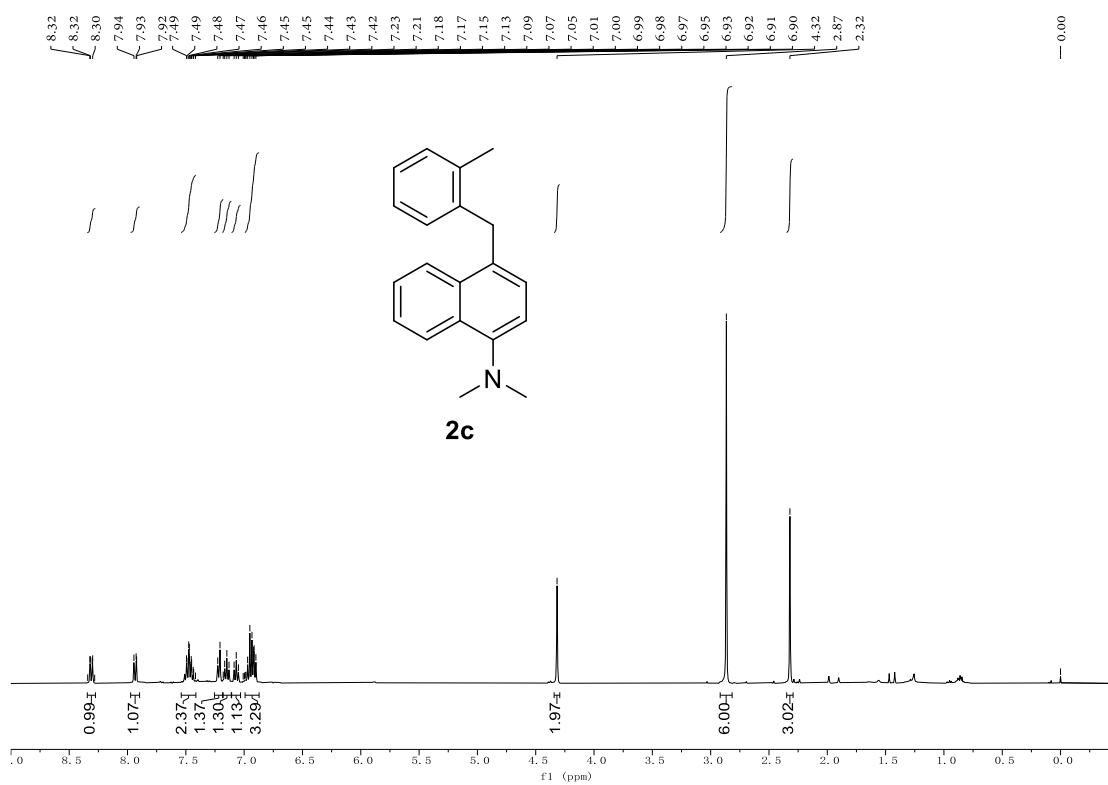

$^{13}\text{C}\{^1\text{H}\}$  NMR, 101 MHz,  $\text{CDCl}_3$

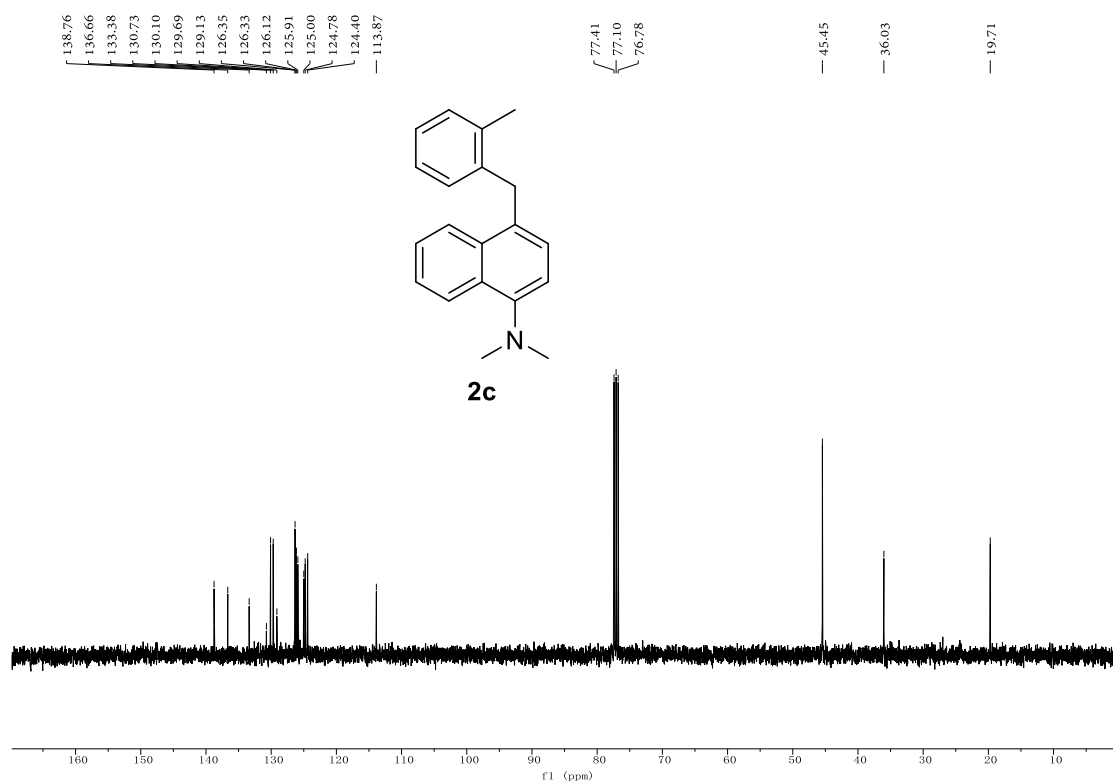

4-(3,4-dimethylbenzyl)-*N,N*-dimethylnaphthalen-1-amine (**2d**)

$^1\text{H}$  NMR, 400 MHz,  $\text{CDCl}_3$

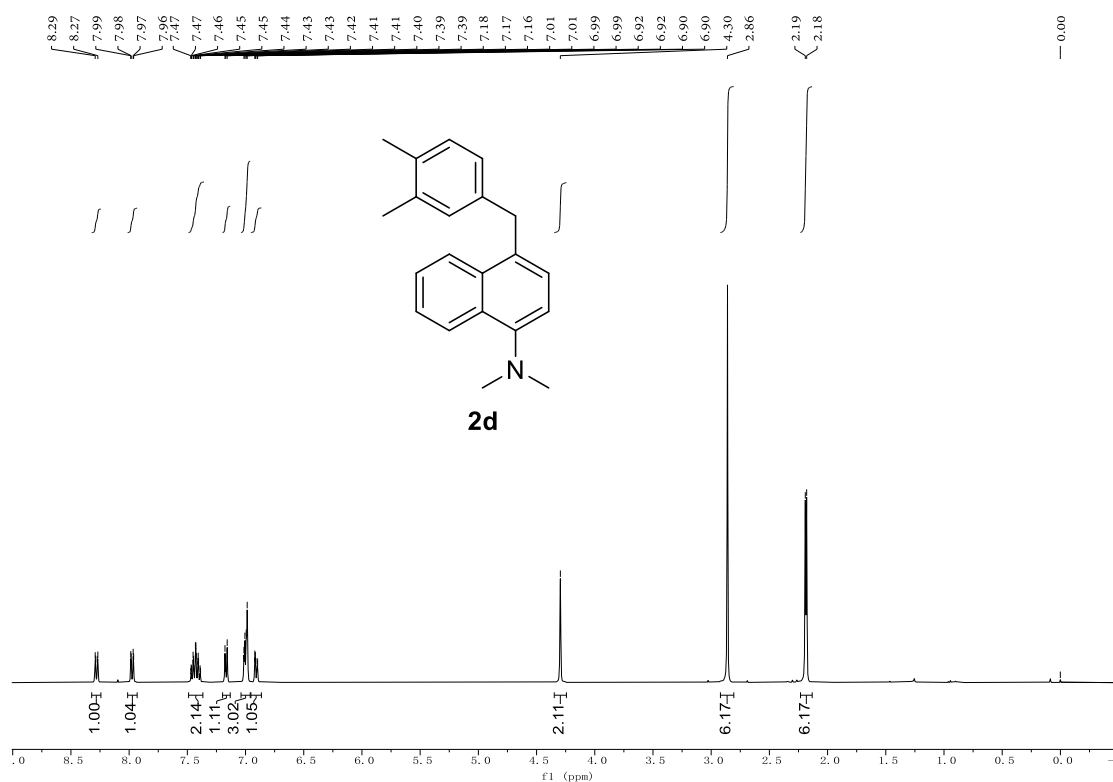

$^{13}\text{C}\{^1\text{H}\}$  NMR, 101 MHz,  $\text{CDCl}_3$

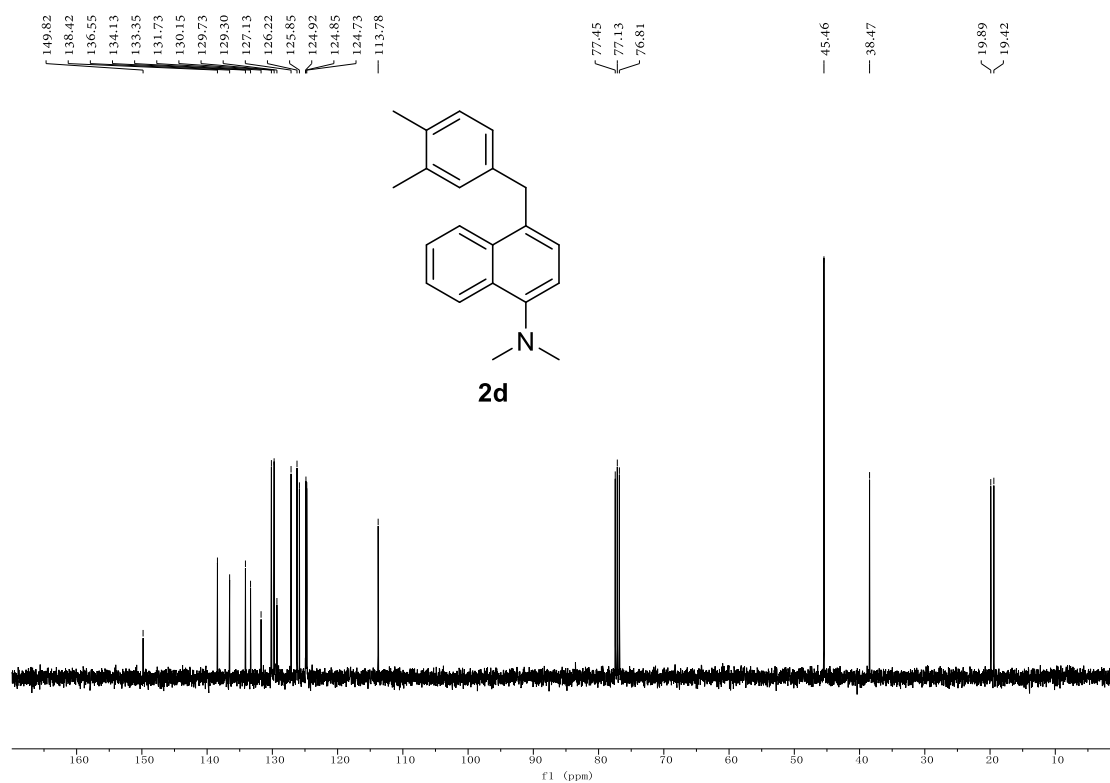

4-(4-fluorobenzyl)-*N,N*-dimethylnaphthalen-1-amine (**2e**)

$^1\text{H}$  NMR, 400 MHz,  $\text{CDCl}_3$

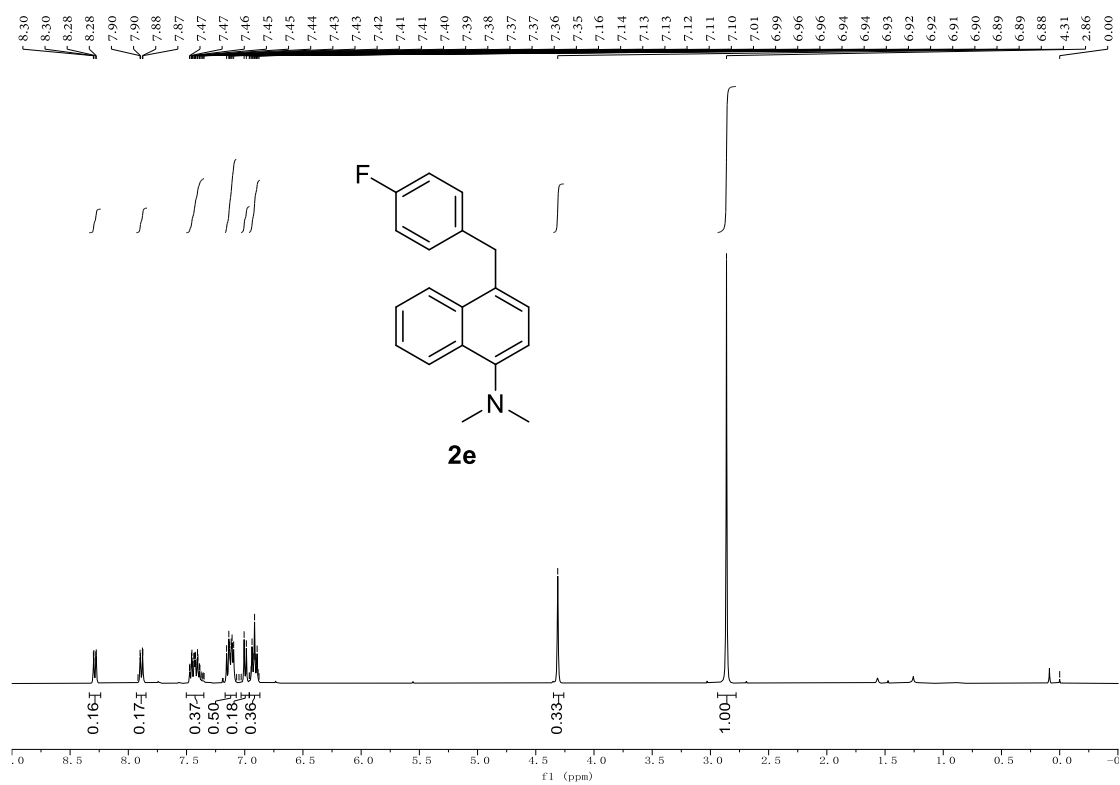



$^{13}\text{C}\{^1\text{H}\}$  NMR, 101 MHz,  $\text{CDCl}_3$

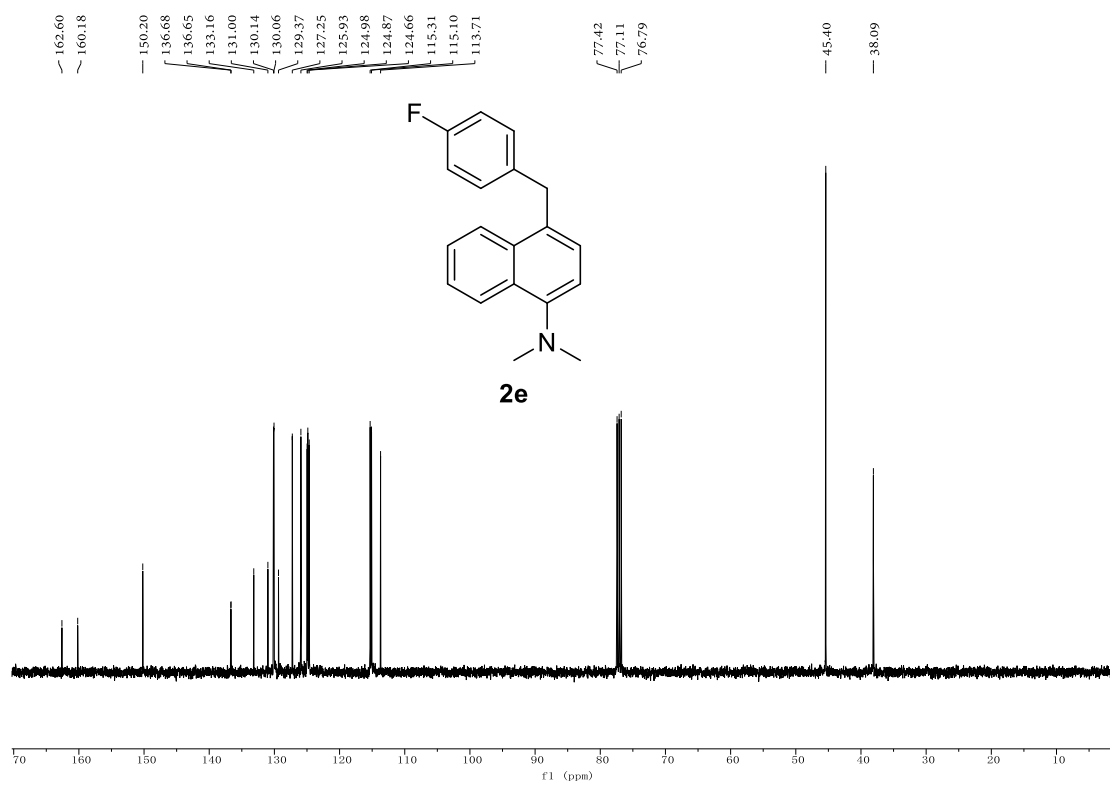

$^{19}\text{F}$  NMR, 376 MHz,  $\text{CDCl}_3$

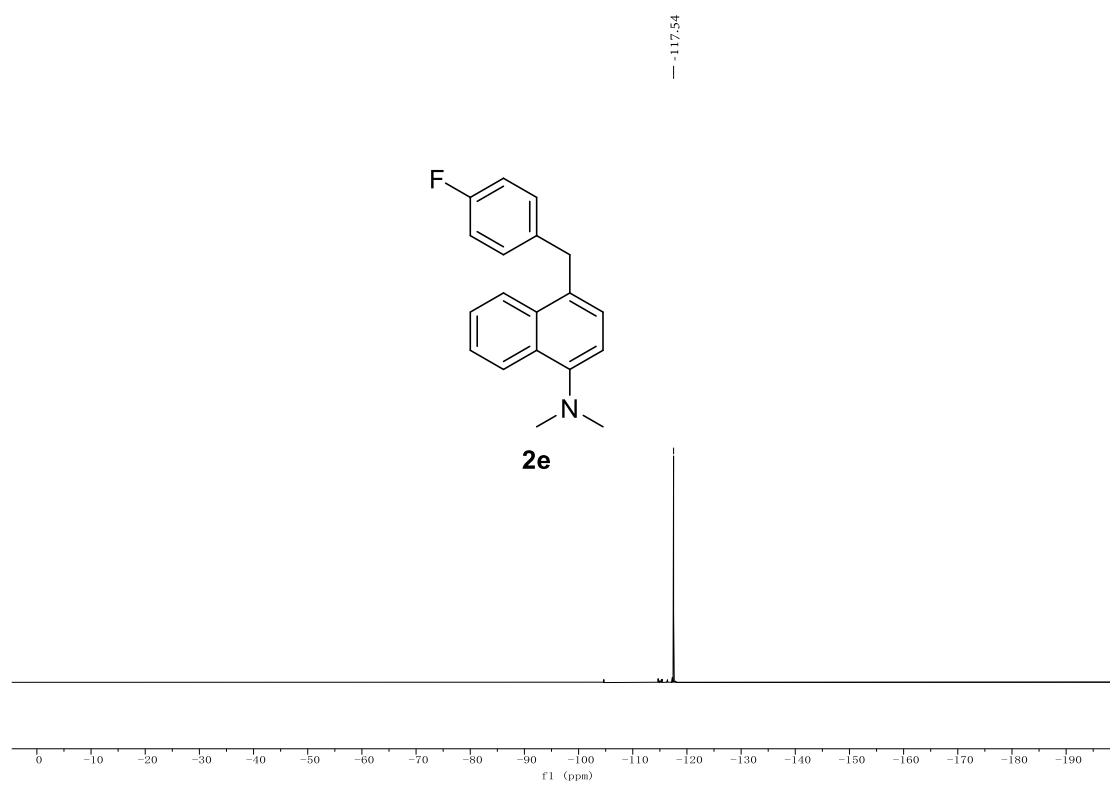

4-(4-chlorobenzyl)-*N,N*-dimethylnaphthalen-1-amine (**2f**)

$^1\text{H}$  NMR, 400 MHz,  $\text{CDCl}_3$

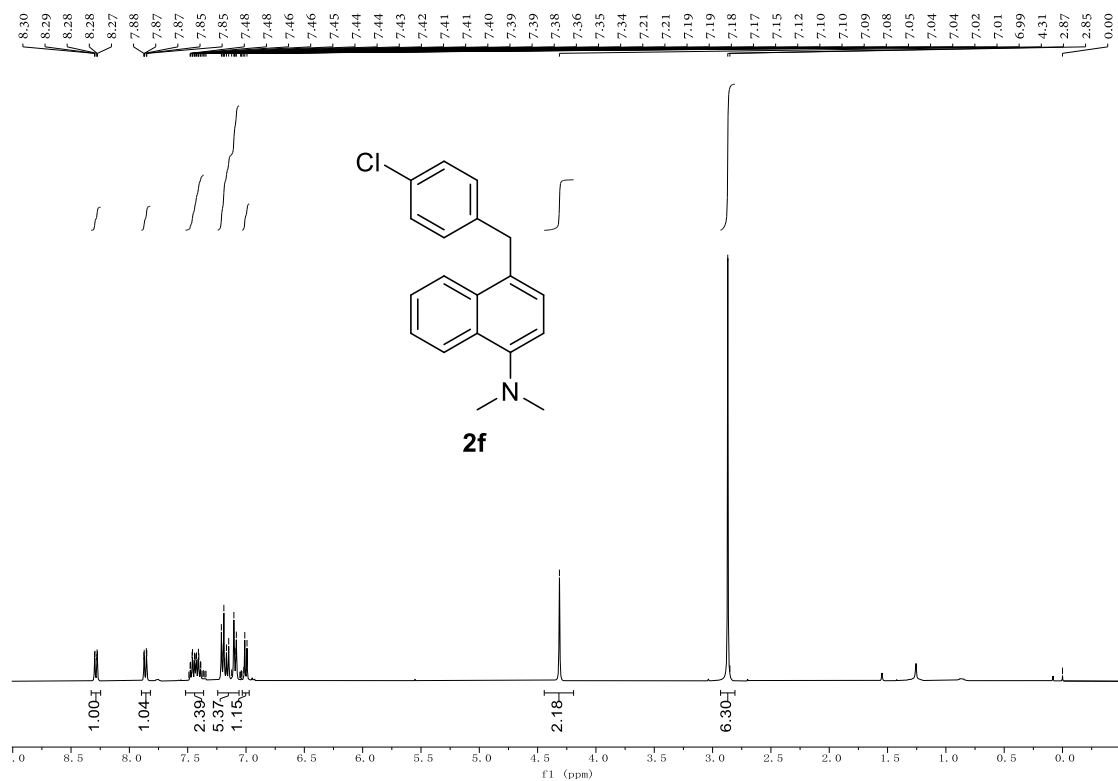

$^{13}\text{C}\{^1\text{H}\}$  NMR, 151 MHz,  $\text{CDCl}_3$

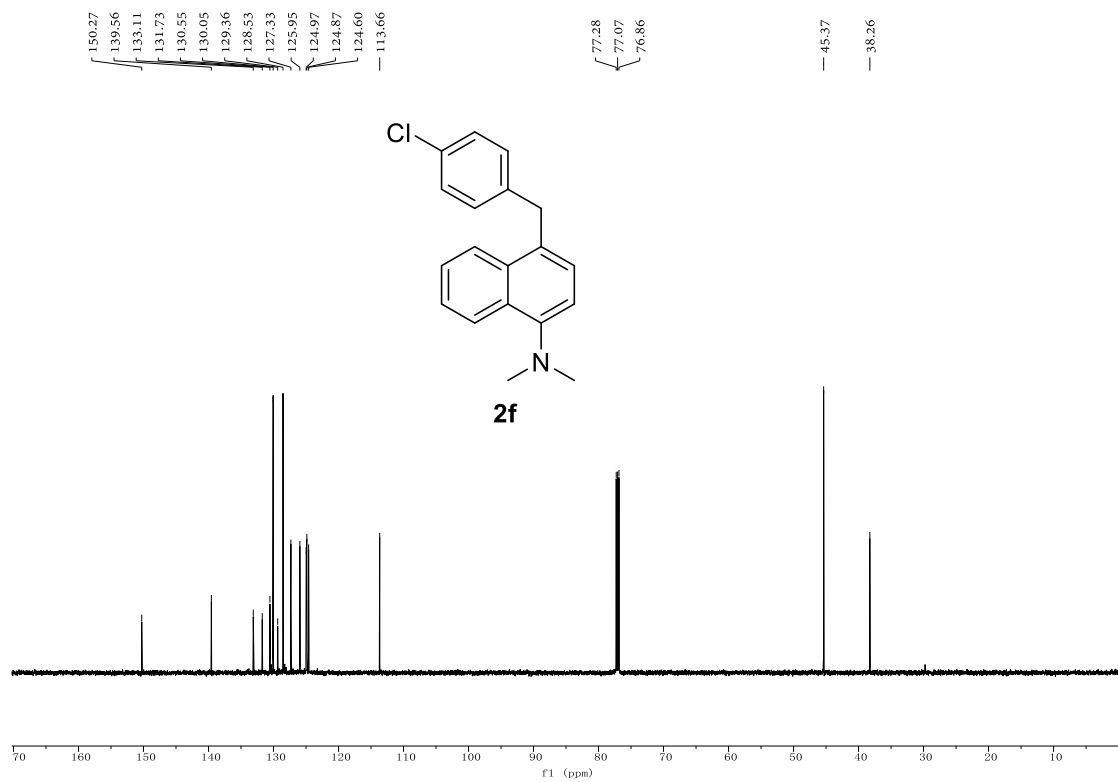

4-(2-fluoro-5-(trifluoromethyl)benzyl)-*N,N*-dimethylnaphthalen-1-amine (**2g**)

$^1\text{H}$  NMR, 400 MHz,  $\text{CDCl}_3$

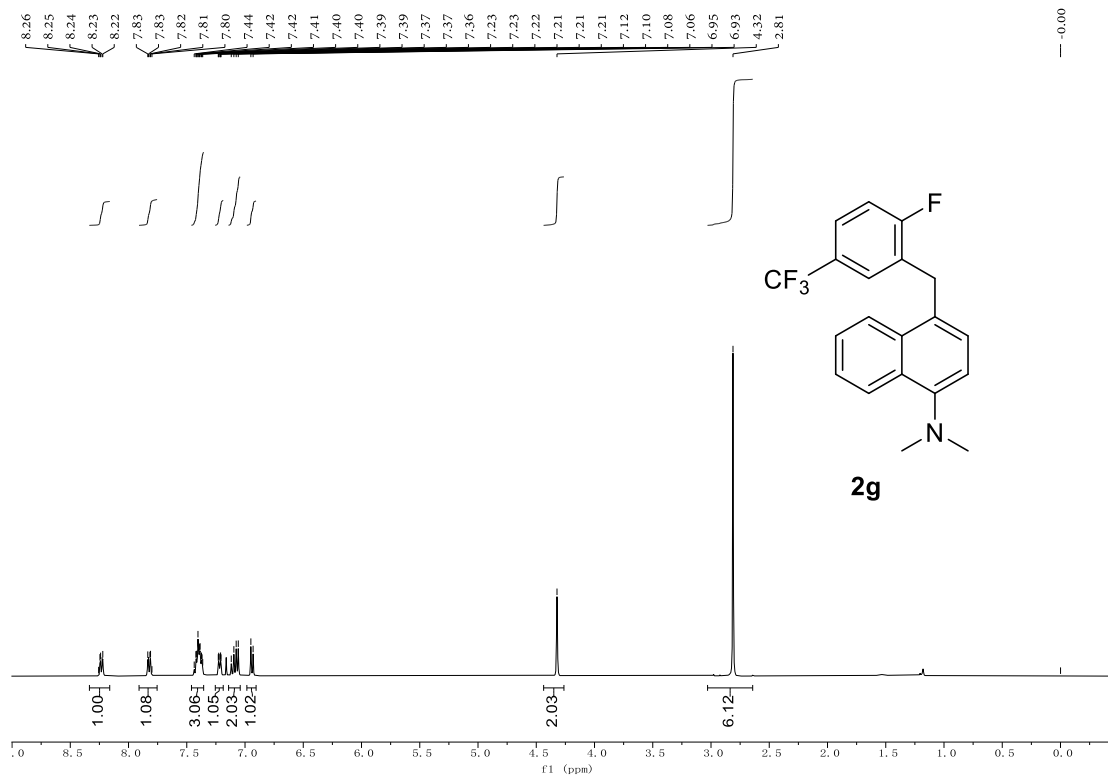

$^{13}\text{C}\{^1\text{H}\}$  NMR, 101 MHz,  $\text{CDCl}_3$

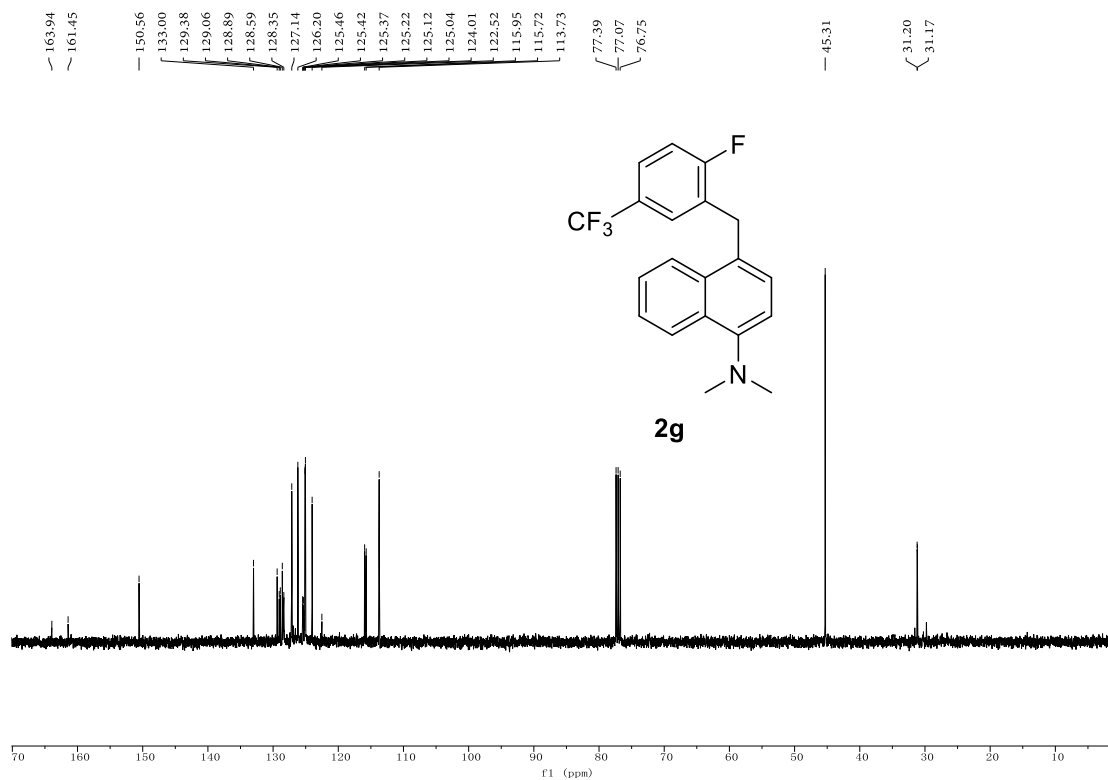

$^{19}\text{F}$  NMR, 376 MHz,  $\text{CDCl}_3$

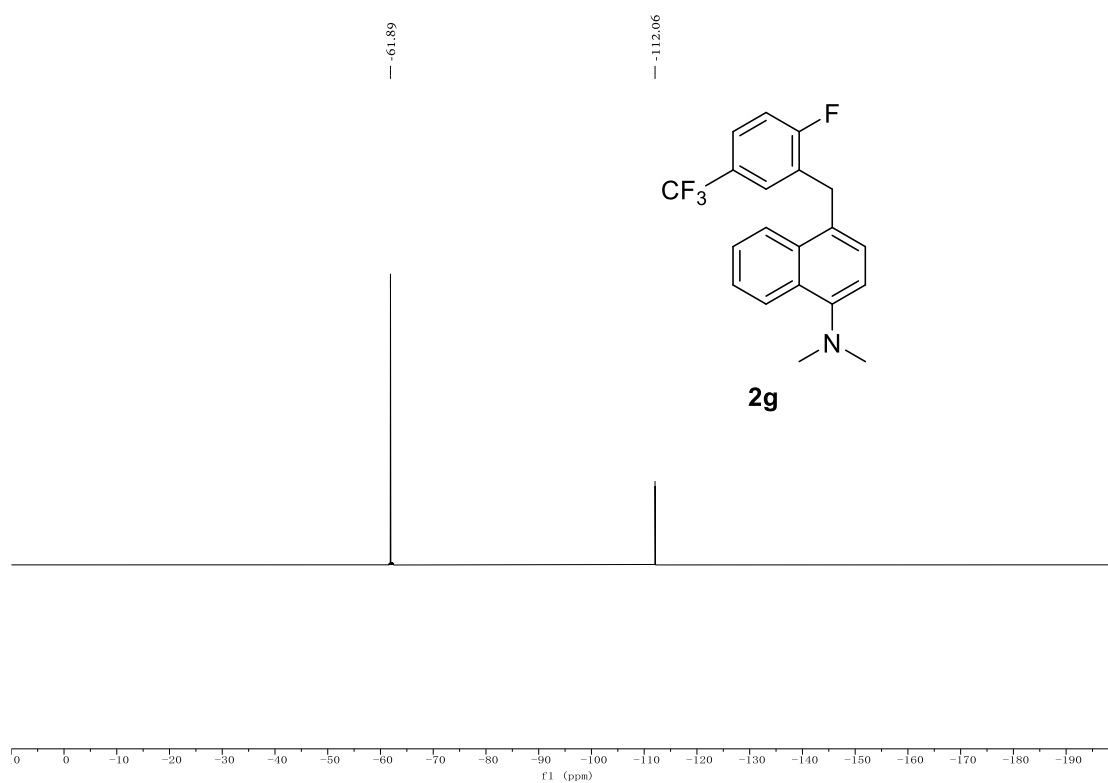

4-((4-(dimethylamino)naphthalen-1-yl)methyl)-*N,N*-diethylbenzamide (**2h**)

$^1\text{H}$  NMR, 400 MHz,  $\text{CDCl}_3$

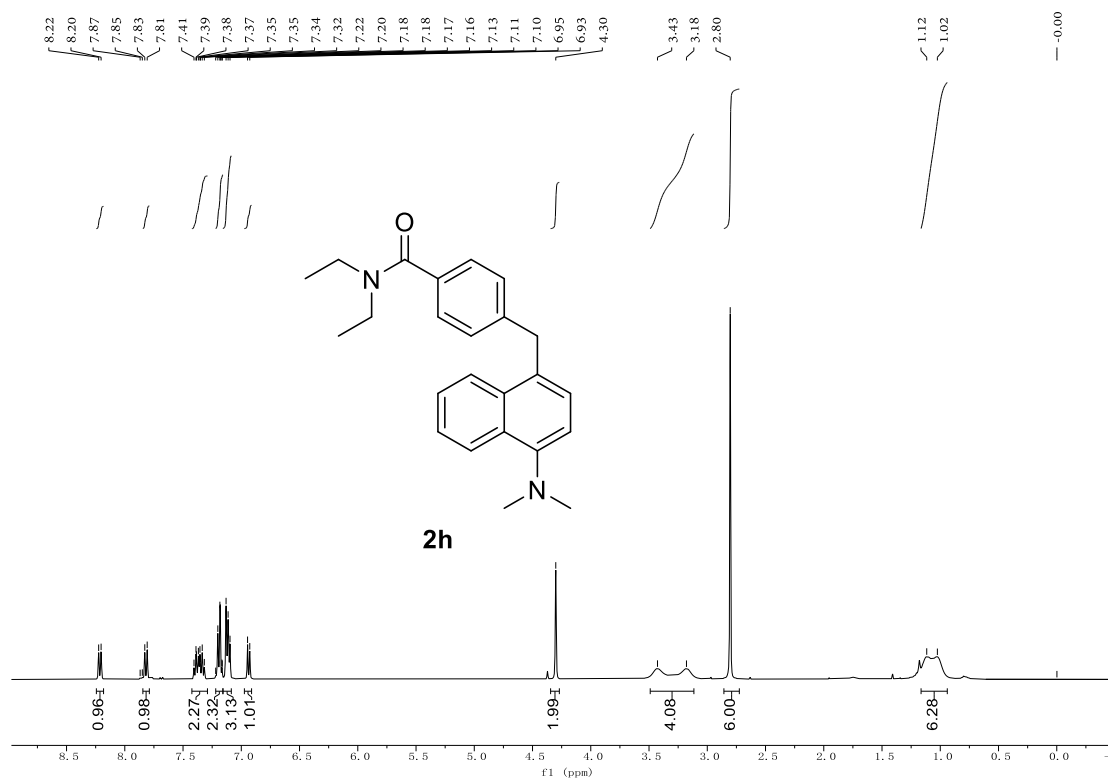

$^{13}\text{C}\{^1\text{H}\}$  NMR, 151 MHz,  $\text{CDCl}_3$

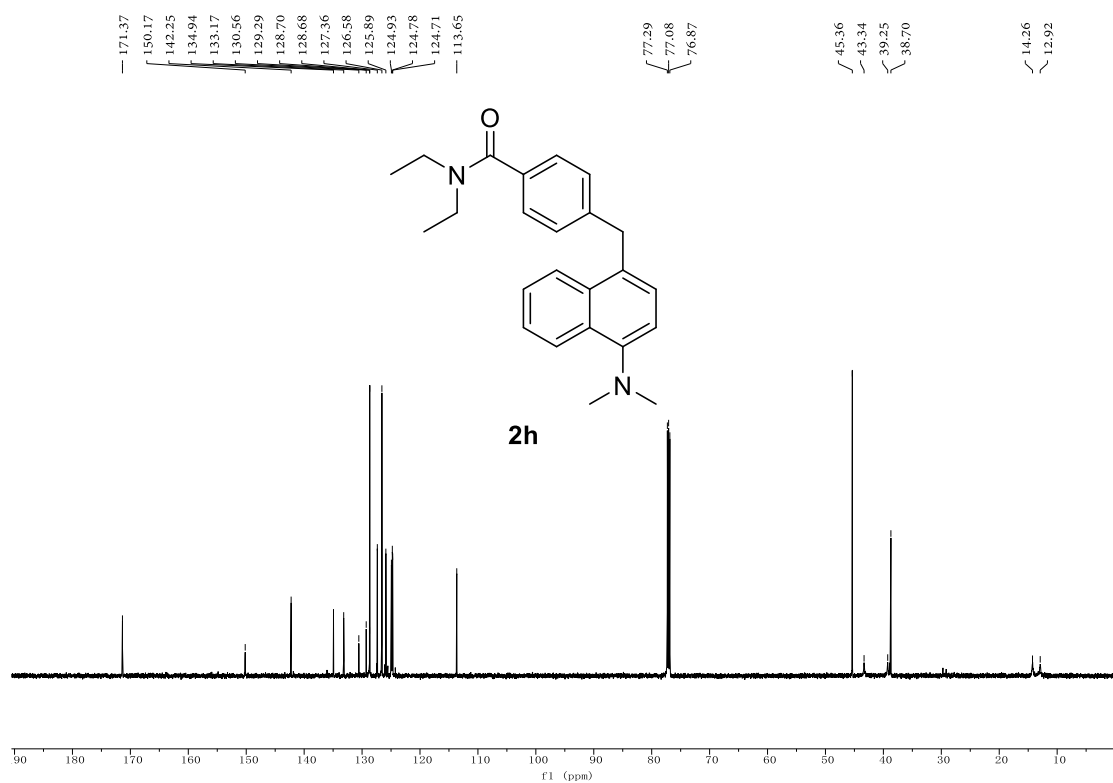

4-ethyl-*N,N*-dimethylnaphthalen-1-amine (**2i**)

$^1\text{H}$  NMR, 400 MHz,  $\text{CDCl}_3$

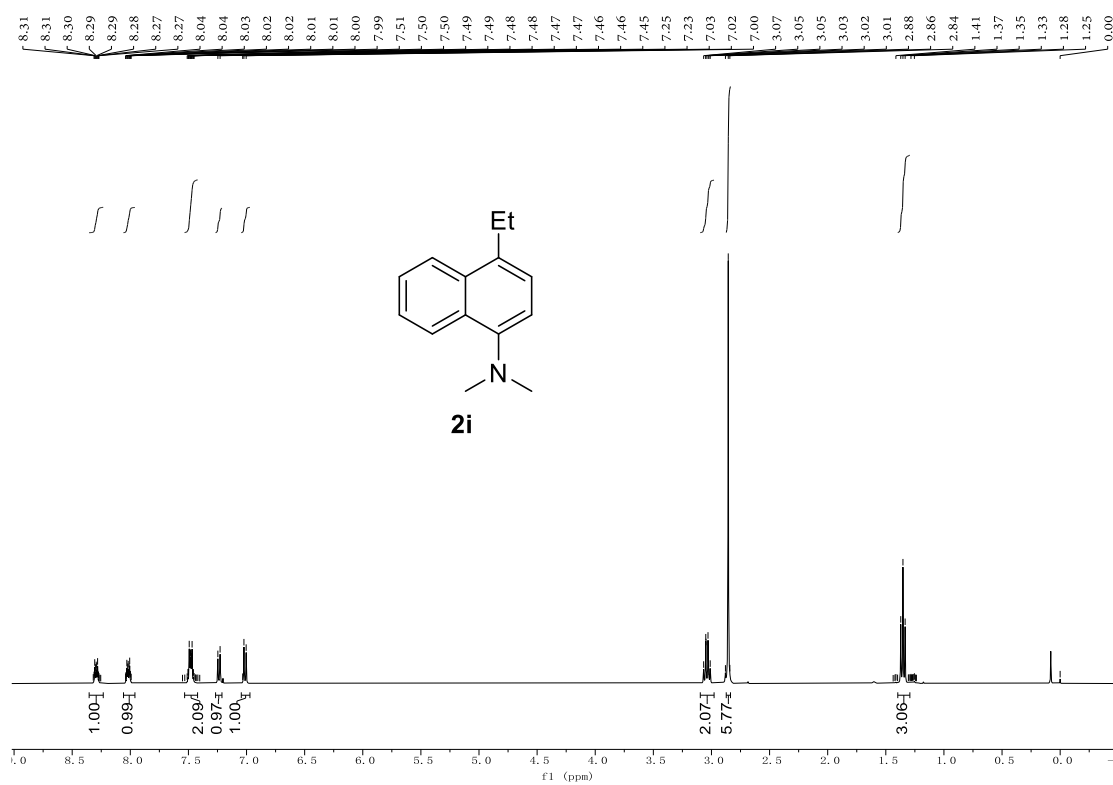

$^{13}\text{C}\{^1\text{H}\}$  NMR, 101 MHz,  $\text{CDCl}_3$

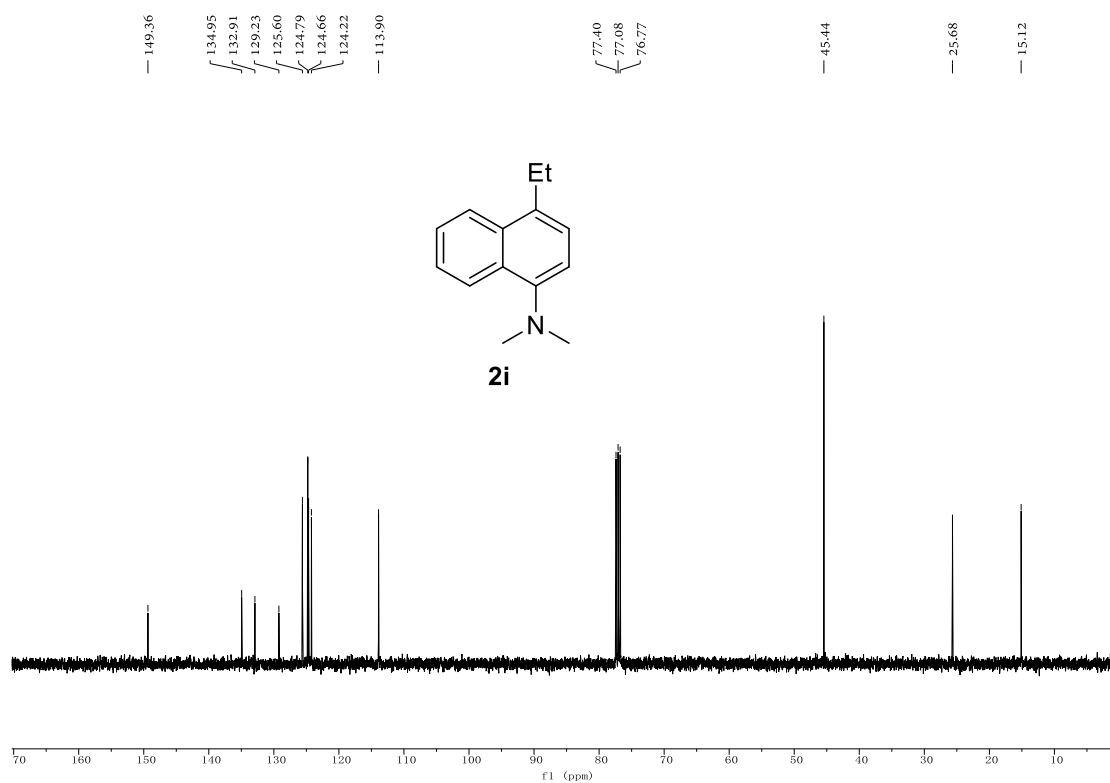

*N,N*-dimethyl-4-propylnaphthalen-1-amine (**2j**)

$^1\text{H}$  NMR, 400 MHz,  $\text{CDCl}_3$

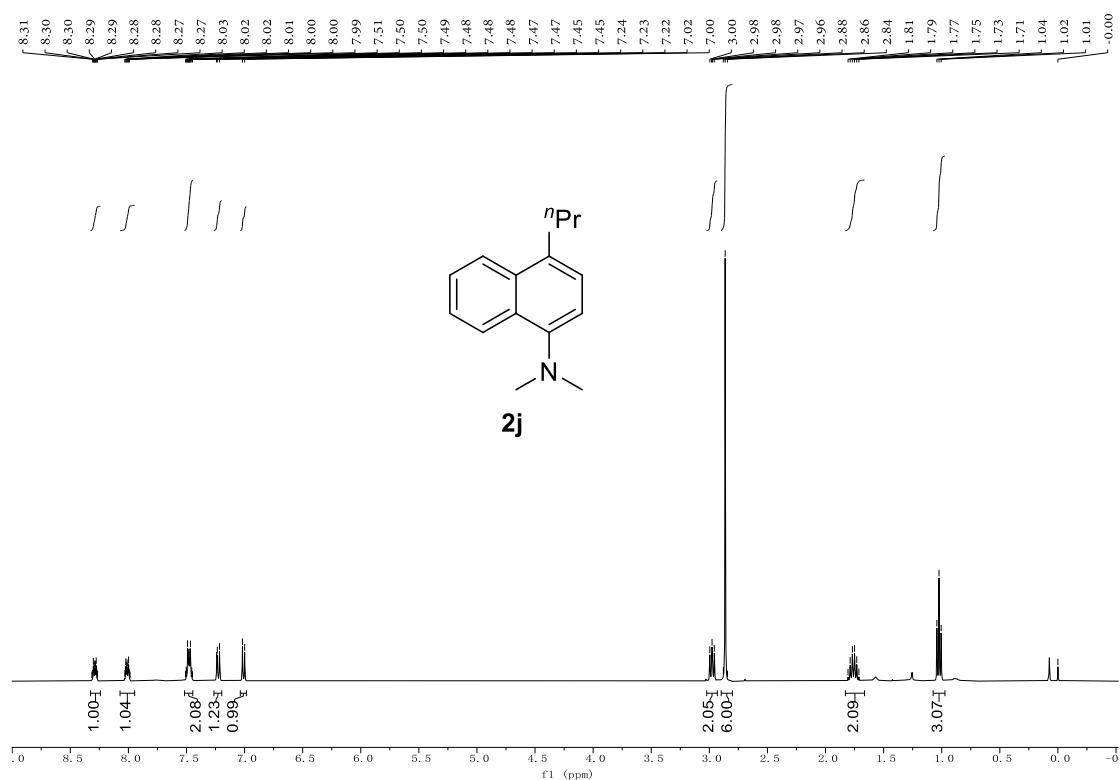

$^{13}\text{C}\{^1\text{H}\}$  NMR, 101 MHz,  $\text{CDCl}_3$

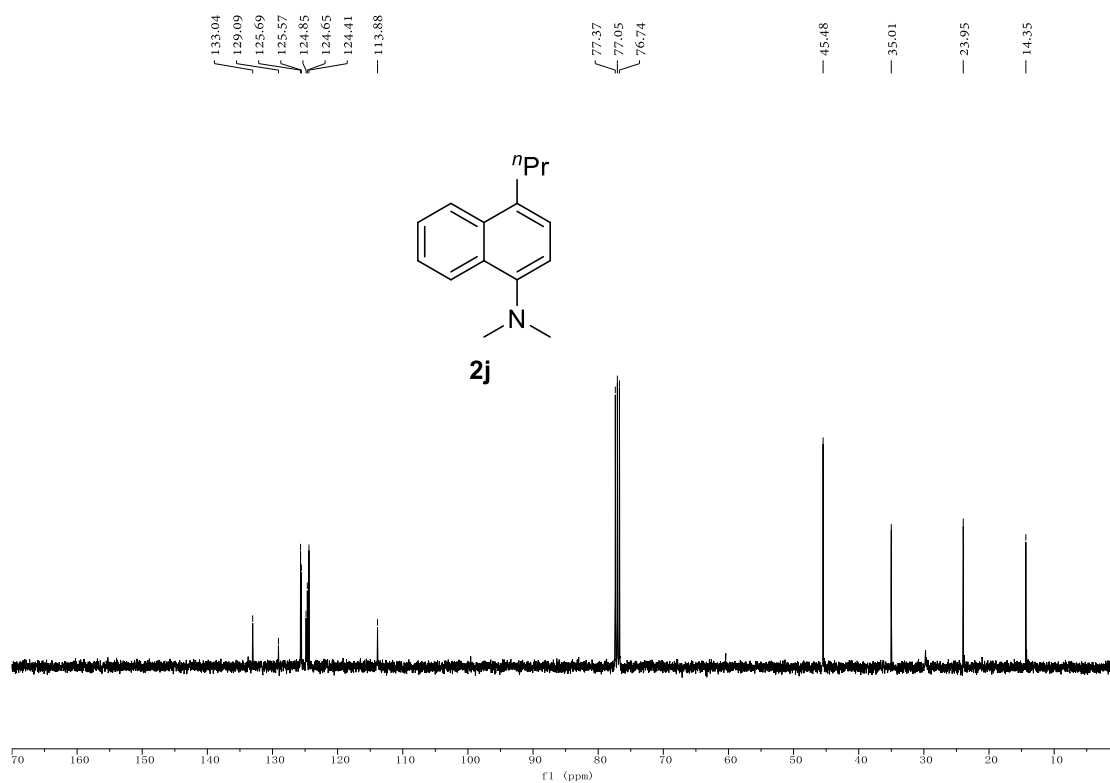

4-isobutyl-*N,N*-dimethylnaphthalen-1-amine (**2k**)

$^1\text{H}$  NMR, 400 MHz,  $\text{CDCl}_3$

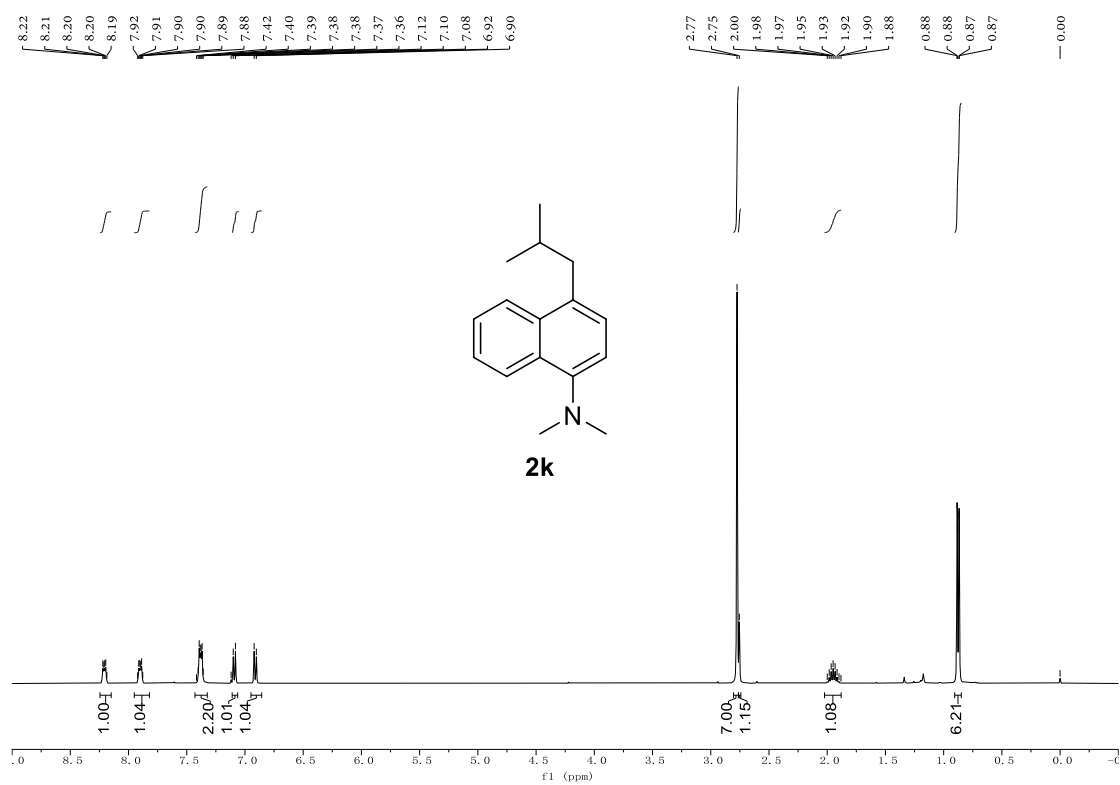

$^{13}\text{C}\{^1\text{H}\}$  NMR, 101 MHz,  $\text{CDCl}_3$

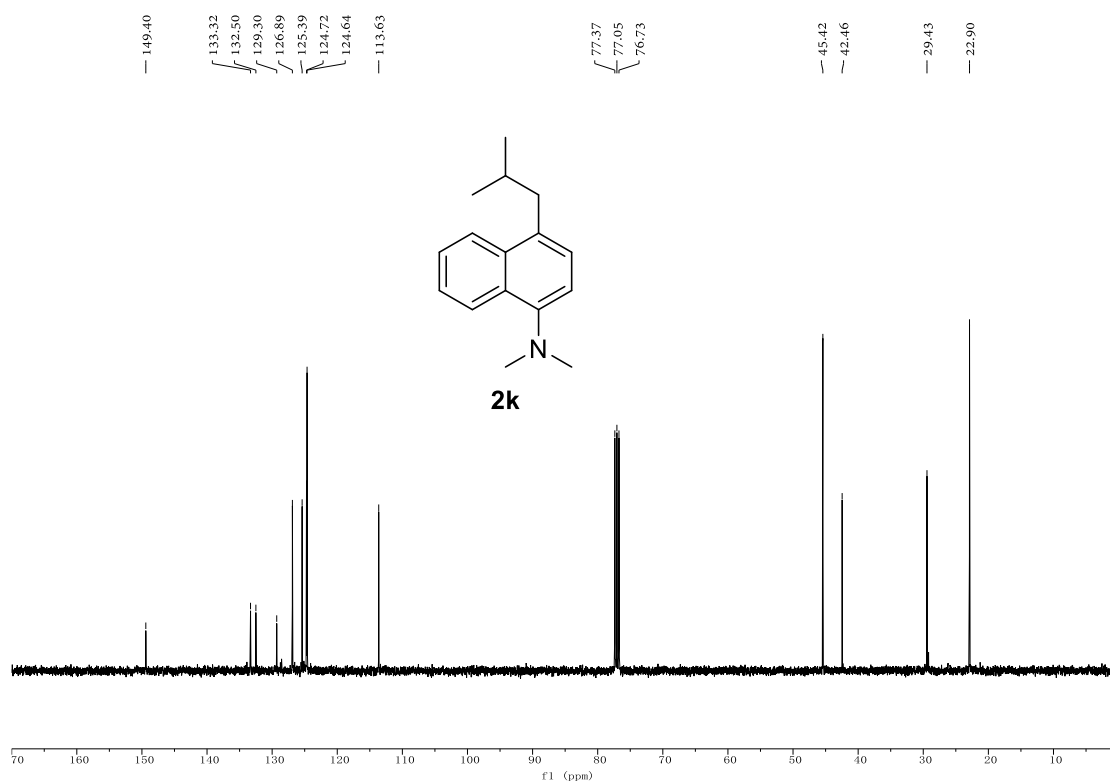

4-butyl-N,N-dimethylnaphthalen-1-amine (**2l**)

$^1\text{H}$  NMR, 400 MHz,  $\text{CDCl}_3$

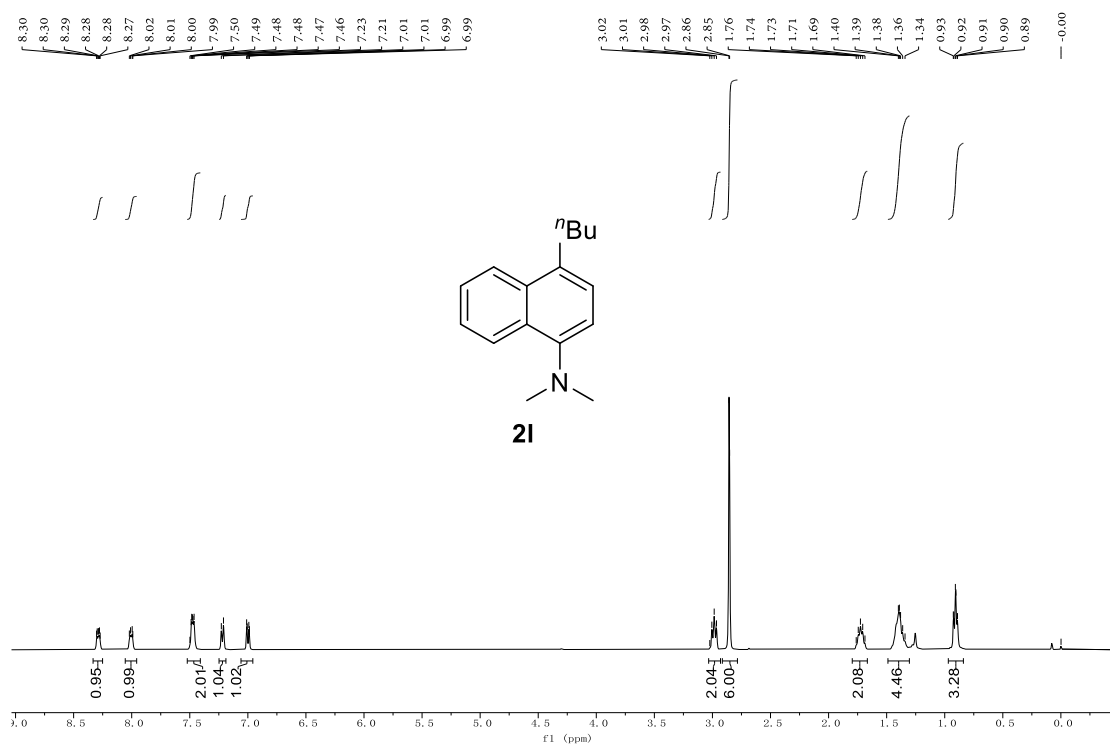



$^{13}\text{C}\{^1\text{H}\}$  NMR, 101 MHz,  $\text{CDCl}_3$

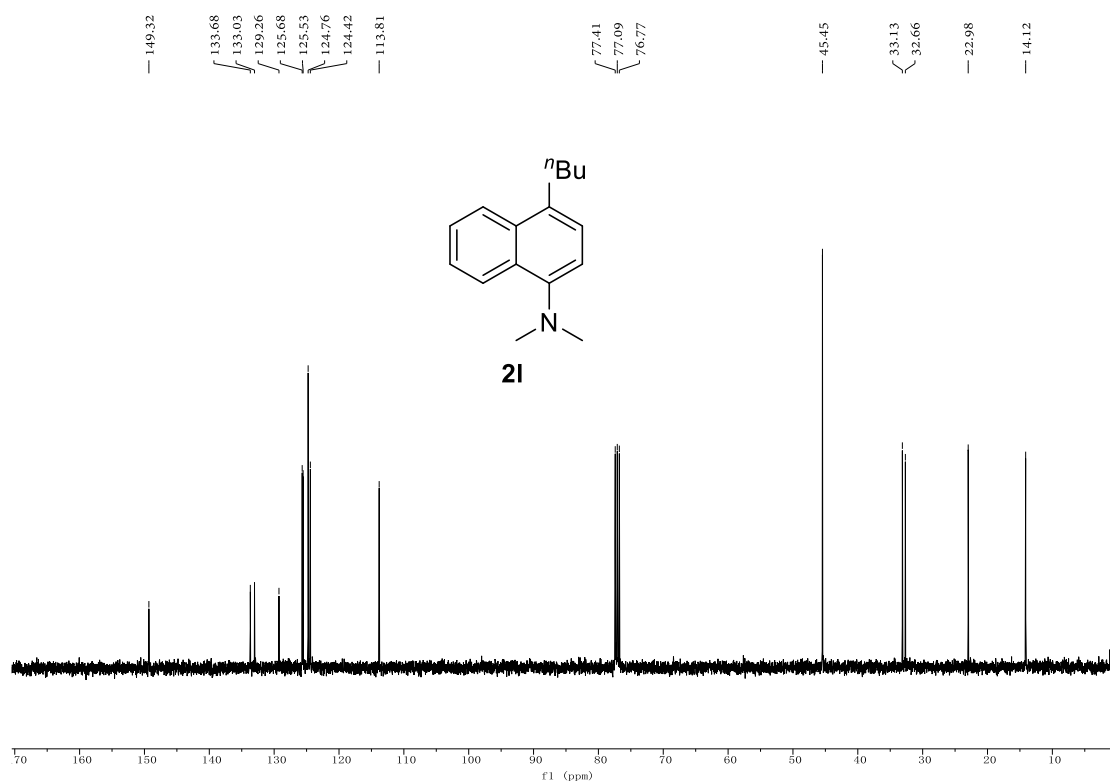

*N,N*-dimethyl-4-pentyl-1-naphthalenylamine (**2m**)

$^1\text{H}$  NMR, 400 MHz,  $\text{CDCl}_3$

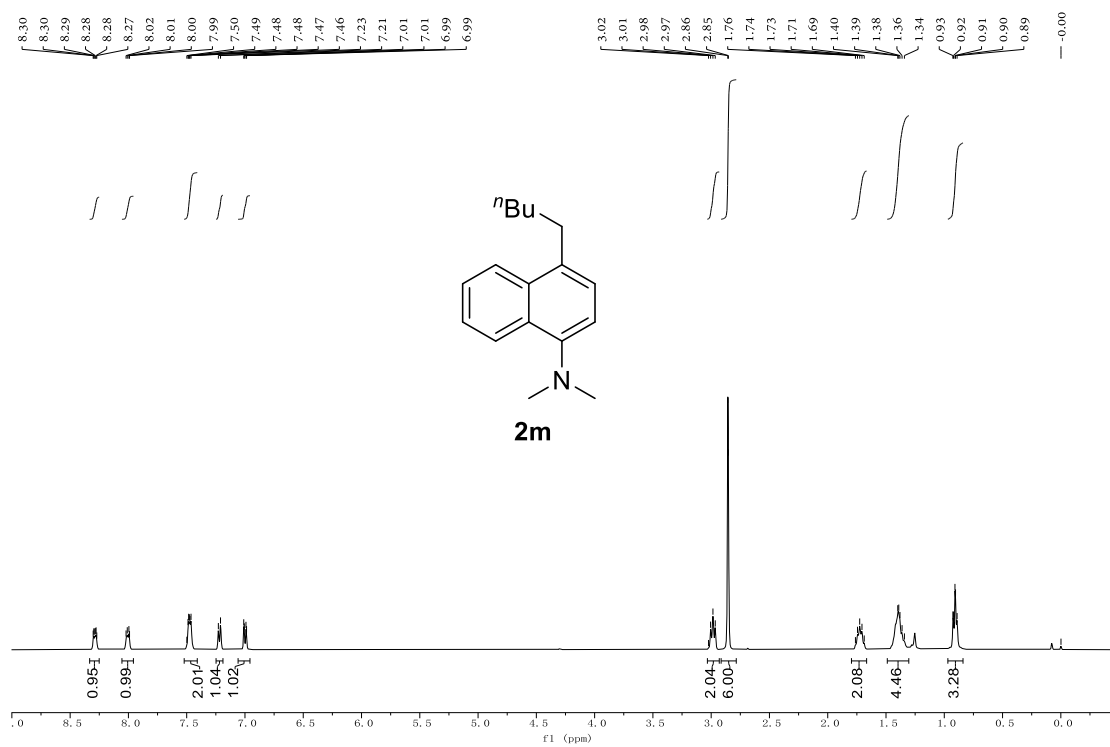

$^{13}\text{C}\{^1\text{H}\}$  NMR, 101 MHz,  $\text{CDCl}_3$

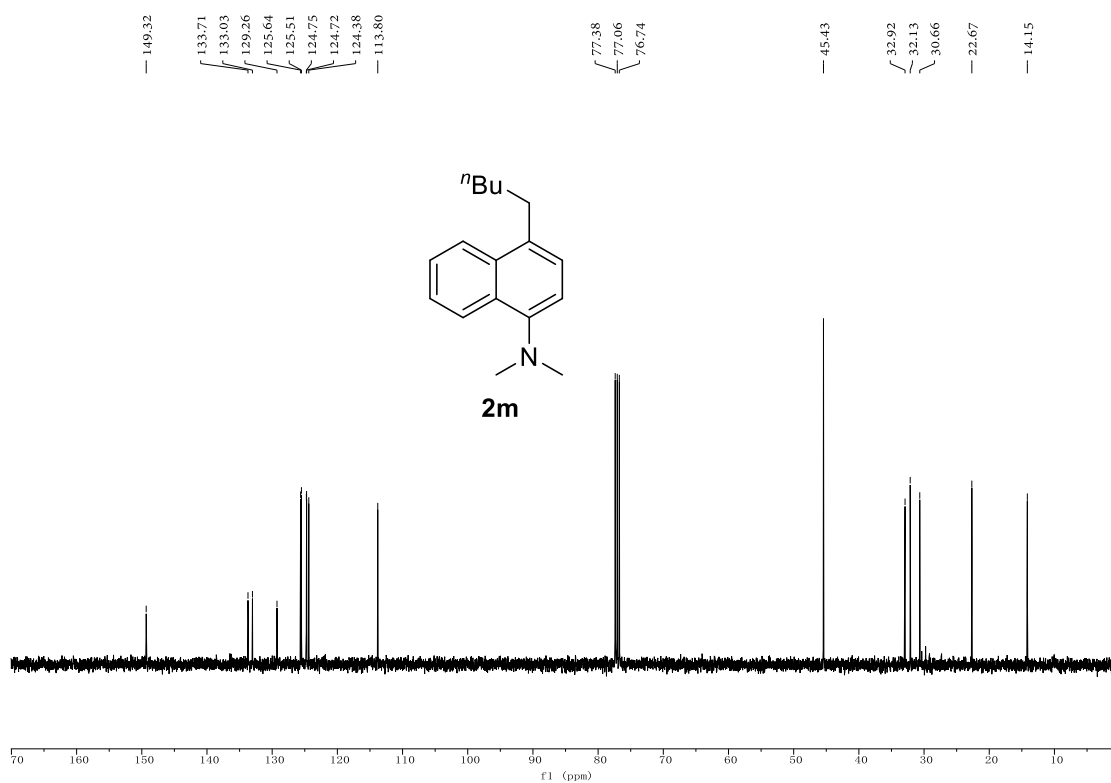

*N,N*,4-trimethylnaphthalen-1-amine (**2n**)

$^1\text{H}$  NMR, 400 MHz,  $\text{CDCl}_3$

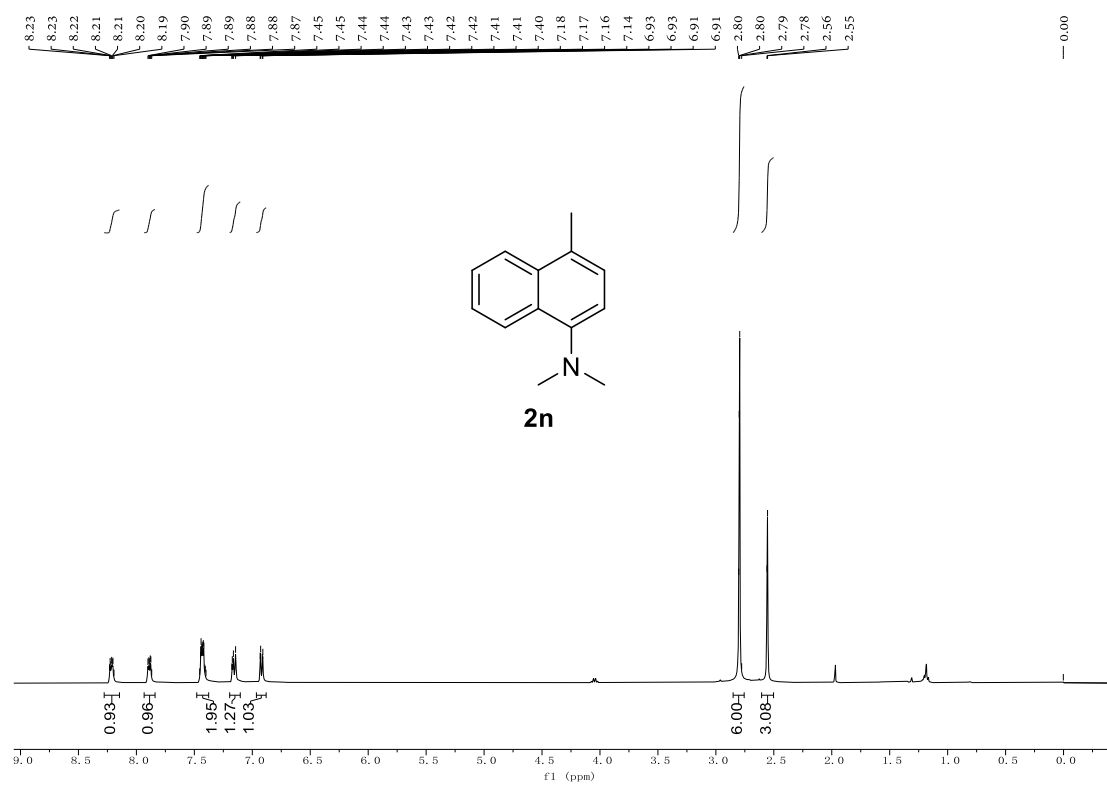

$^{13}\text{C}\{^1\text{H}\}$  NMR, 101 MHz,  $\text{CDCl}_3$

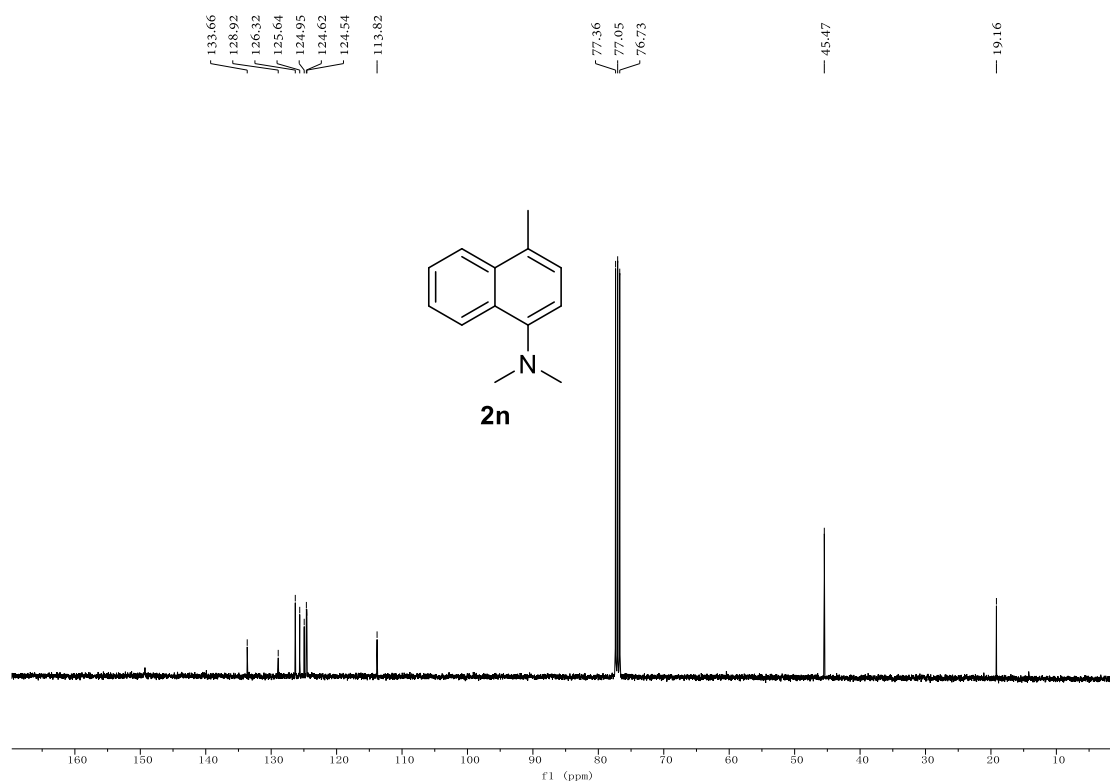

*N,N*,3,4-tetramethylnaphthalen-1-amine (**2o**)

$^1\text{H}$  NMR, 400 MHz,  $\text{CDCl}_3$

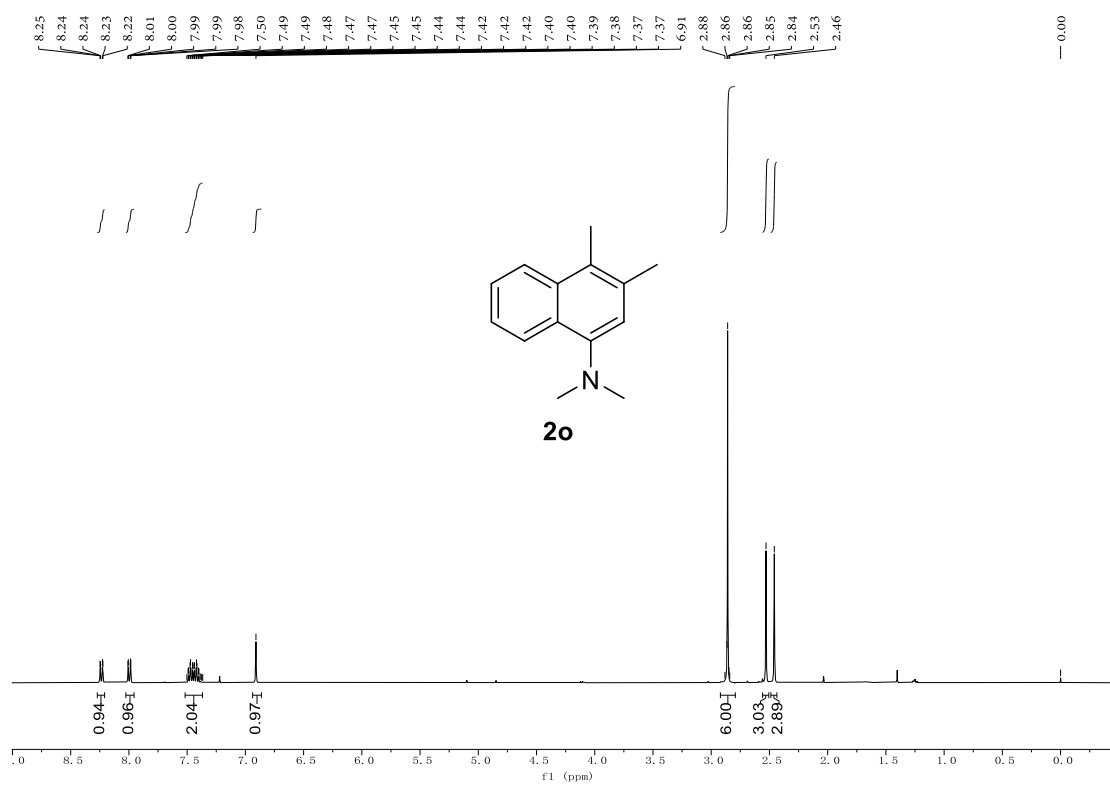

$^{13}\text{C}\{^1\text{H}\}$  NMR, 101 MHz,  $\text{CDCl}_3$

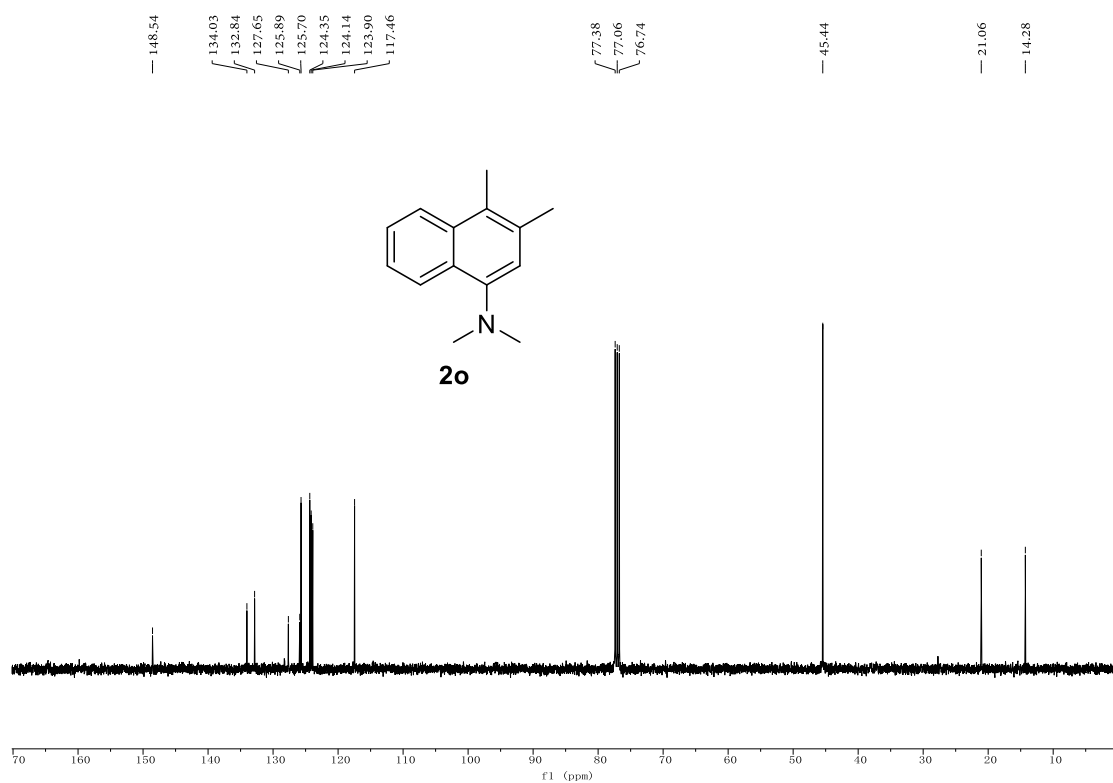

3-methoxy-*N,N*,4-trimethylnaphthalen-1-amine (2p)

$^1\text{H}$  NMR, 400 MHz,  $\text{CDCl}_3$

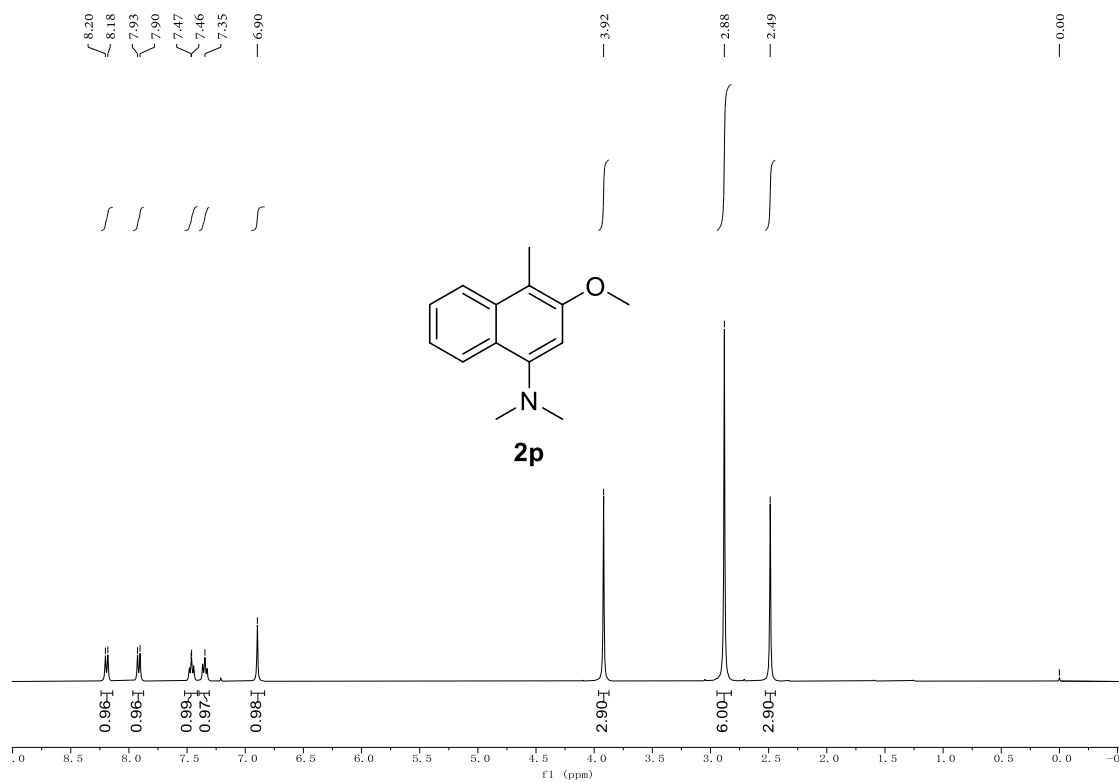

$^{13}\text{C}\{^1\text{H}\}$  NMR, 101 MHz,  $\text{CDCl}_3$

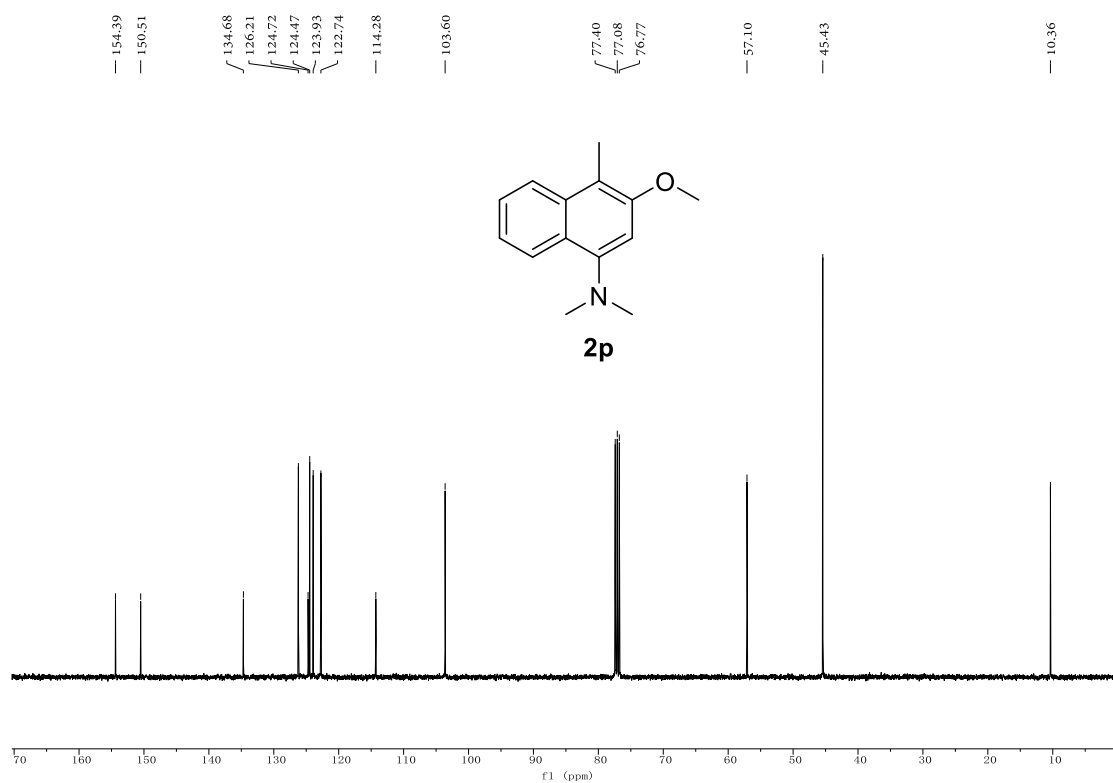

4-benzyl-*N,N*-dimethylaniline (**2q**)

$^1\text{H}$  NMR, 400 MHz,  $\text{CDCl}_3$

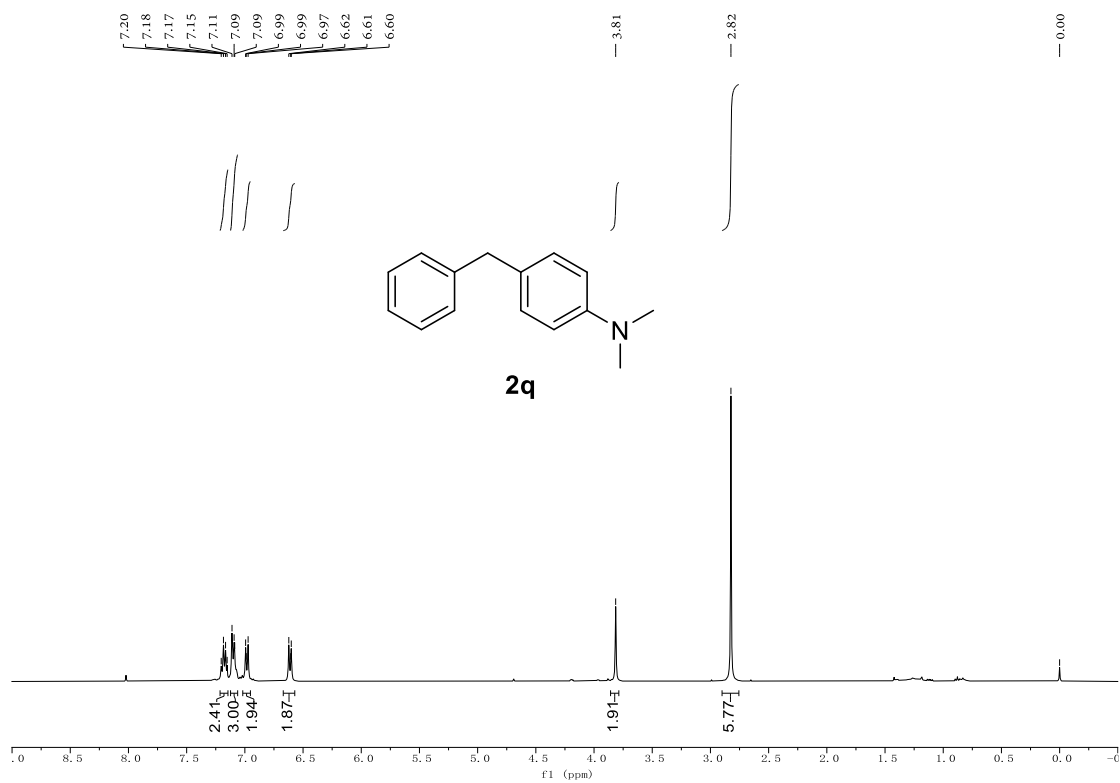

$^{13}\text{C}\{^1\text{H}\}$  NMR, 101 MHz,  $\text{CDCl}_3$

149.18  
142.10  
129.58  
129.52  
128.84  
128.37  
125.81  
113.04  
77.37  
77.05  
76.73  
40.97  
40.88

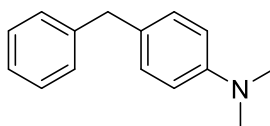

**2q**

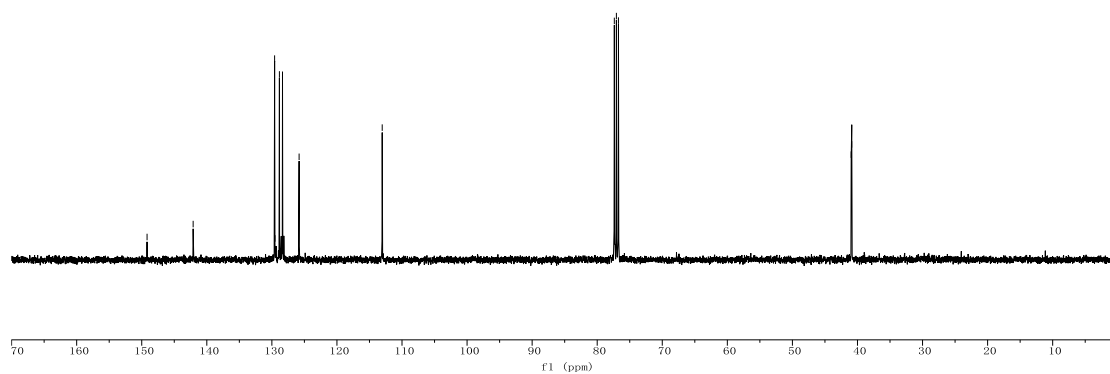

1-vinylnaphthalene (**2ib**)

$^1\text{H}$  NMR, 400 MHz,  $\text{CDCl}_3$

8.13  
8.12  
8.11  
8.10  
8.10  
8.09  
8.08  
7.85  
7.84  
7.83  
7.82  
7.78  
7.76  
7.62  
7.62  
7.61  
7.60  
7.60  
7.50  
7.50  
7.49  
7.48  
7.48  
7.48  
7.47  
7.47  
7.46  
7.46  
7.44  
7.43  
7.42  
5.80  
5.80  
5.76  
5.76  
5.48  
5.48  
5.45  
5.45  
0.00

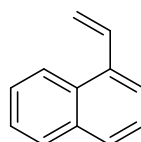

**2ib**

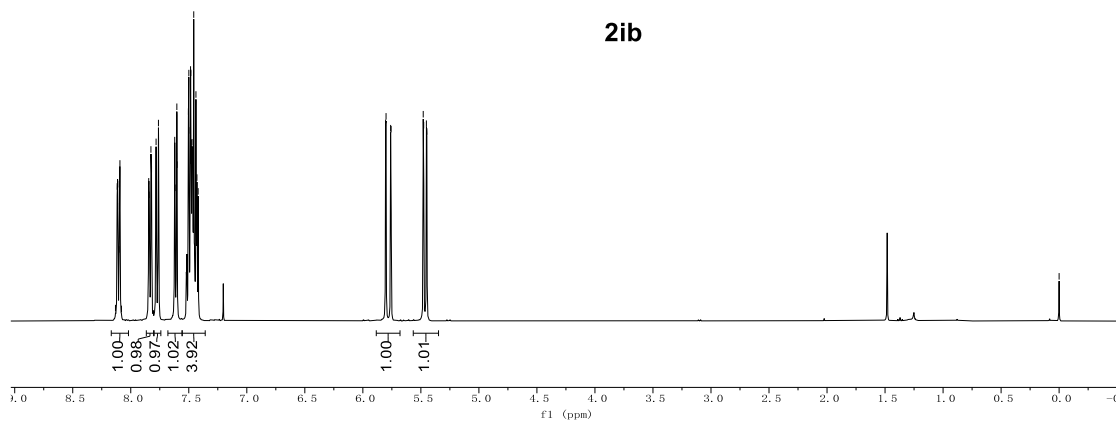

$^{13}\text{C}\{^1\text{H}\}$  NMR, 101 MHz,  $\text{CDCl}_3$

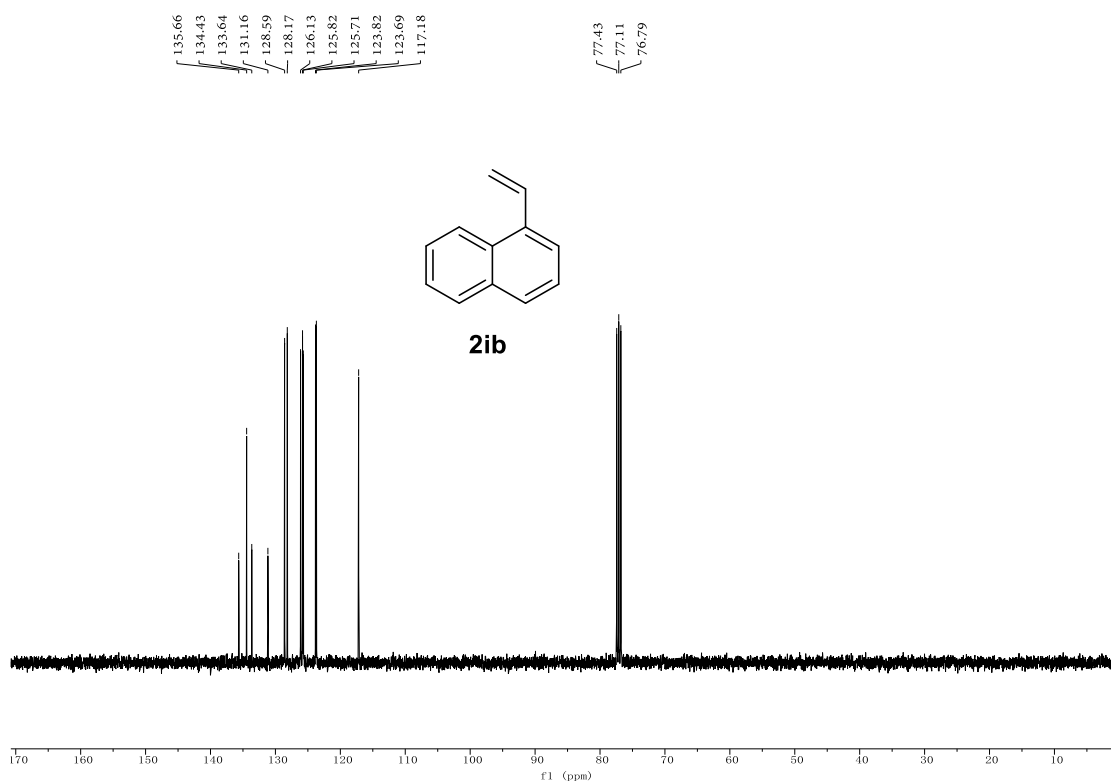

4-benzyl-2-bromo-*N,N*-dimethylnaphthalen-1-amine (**2ab**)

$^1\text{H}$  NMR, 400 MHz,  $\text{CDCl}_3$

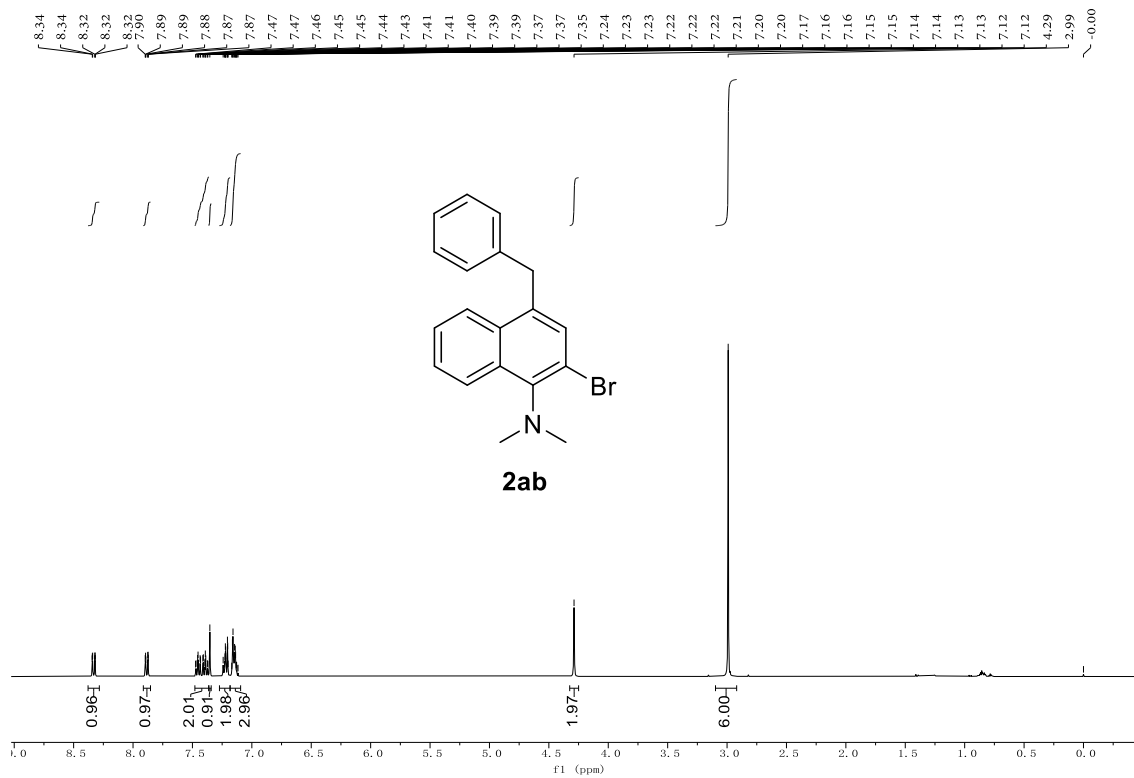

$^{13}\text{C}\{^1\text{H}\}$  NMR, 101 MHz,  $\text{CDCl}_3$

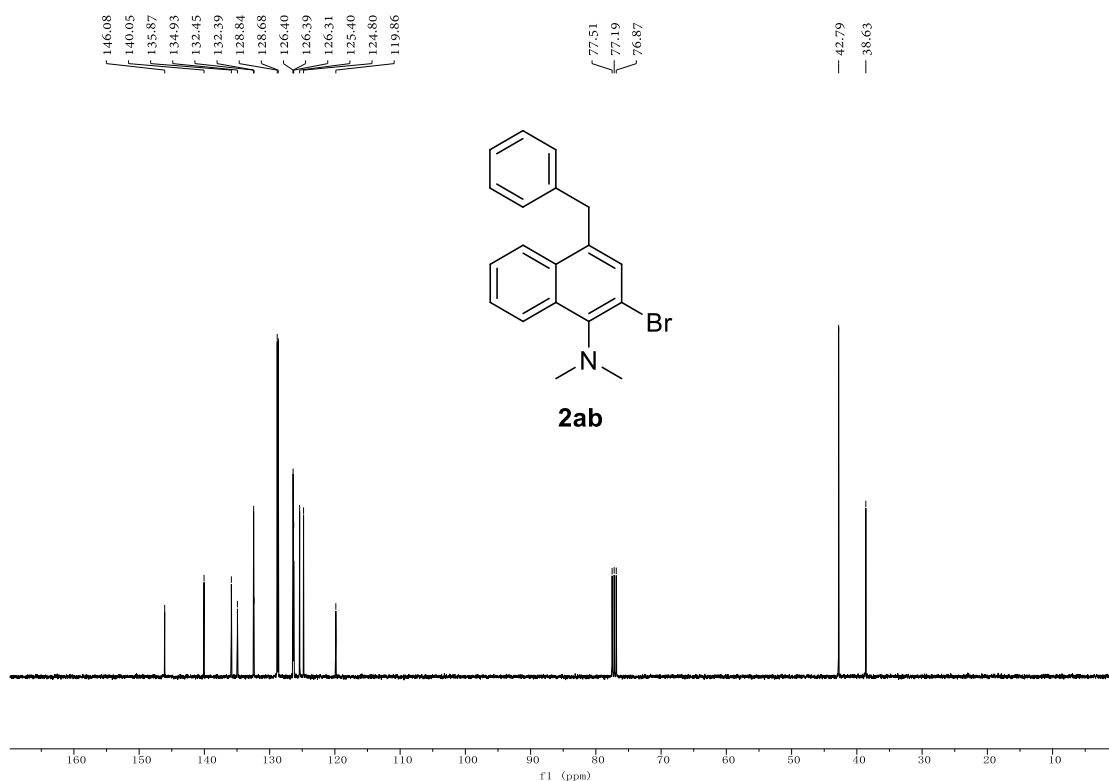

4-benzyl-2-(diphenylphosphaneyl)-*N,N*-dimethylnaphthalen-1-amine (**2ac**)

$^1\text{H}$  NMR, 400 MHz,  $\text{CDCl}_3$

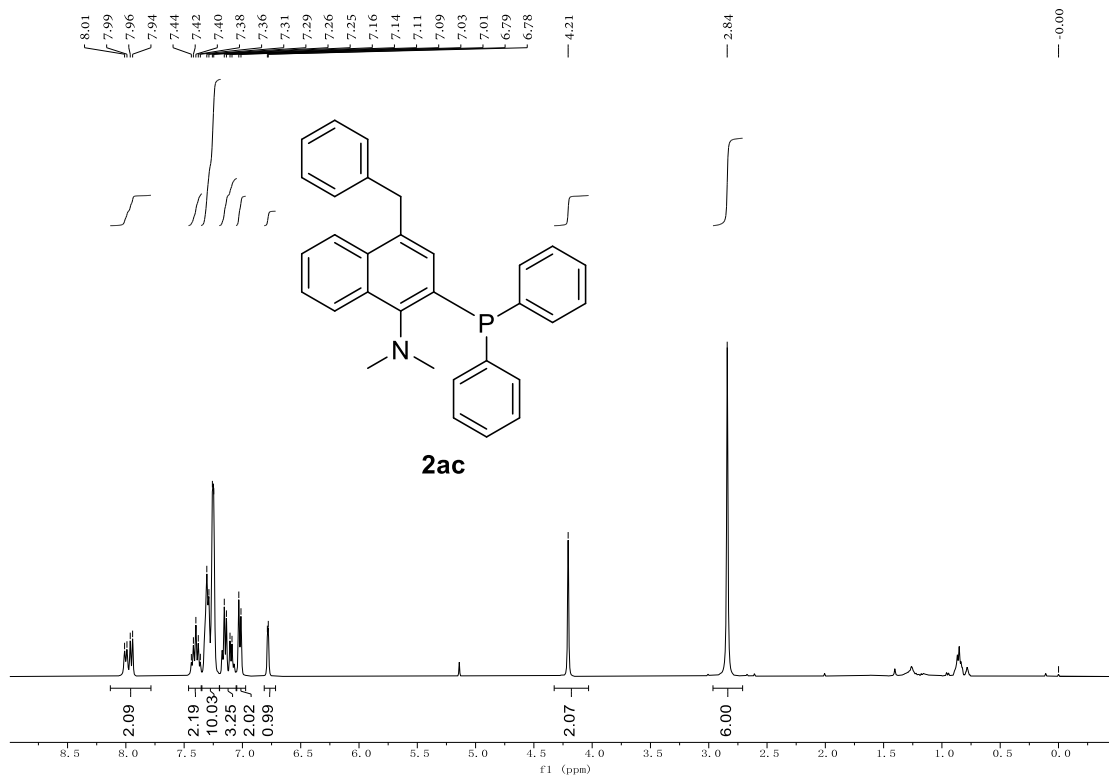



$^{13}\text{C}\{^1\text{H}\}$  NMR, 101 MHz,  $\text{CDCl}_3$

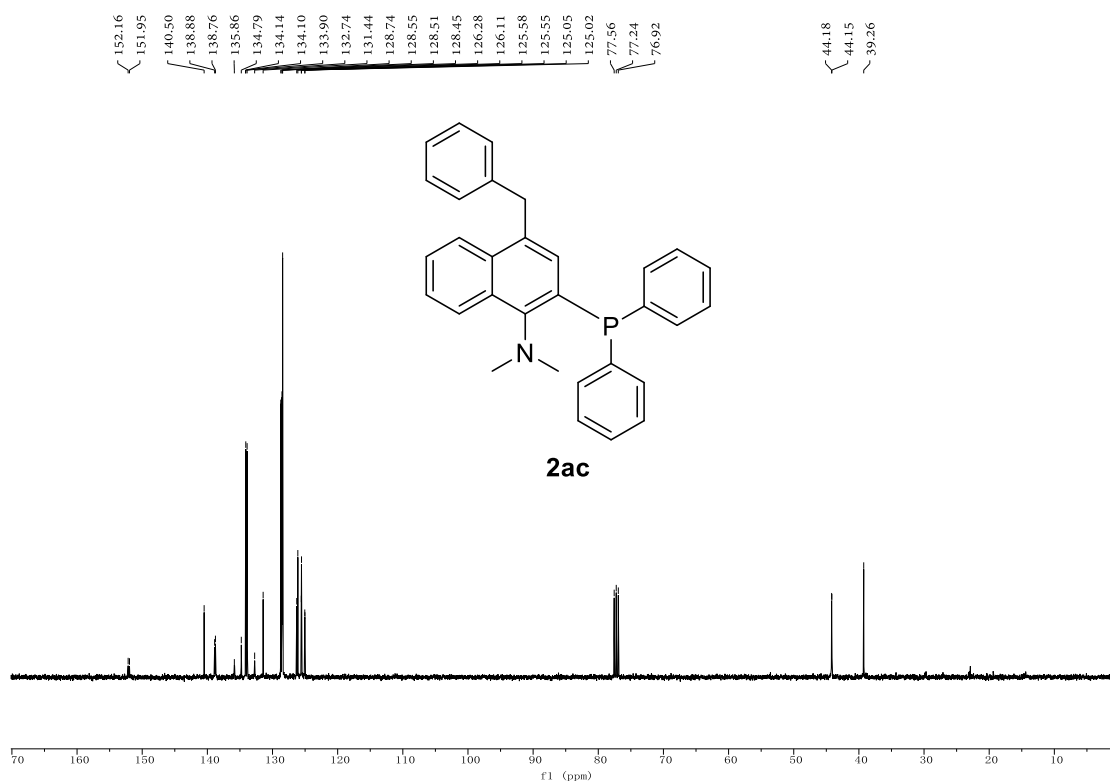

$^{31}\text{P}$  NMR, 162 MHz,  $\text{CDCl}_3$

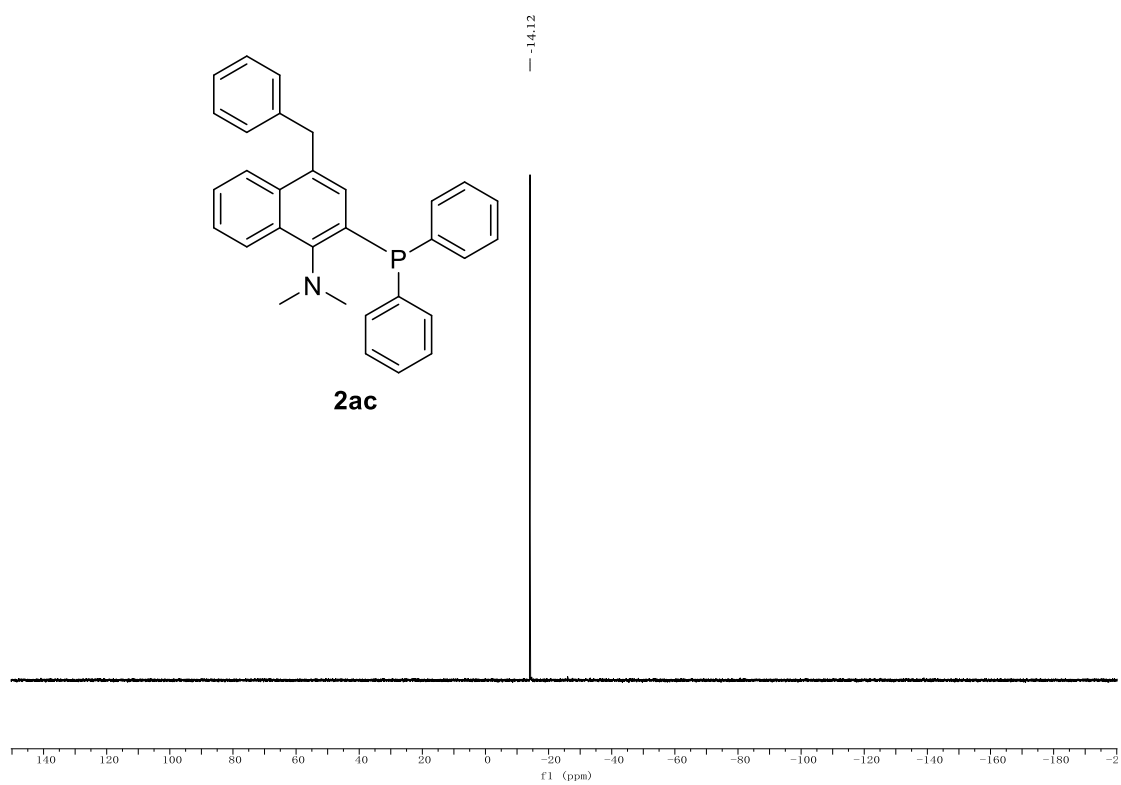

2-benzyl-1,3,5-trimethylbenzene (**5**)

$^1\text{H}$  NMR, 400 MHz,  $\text{CDCl}_3$

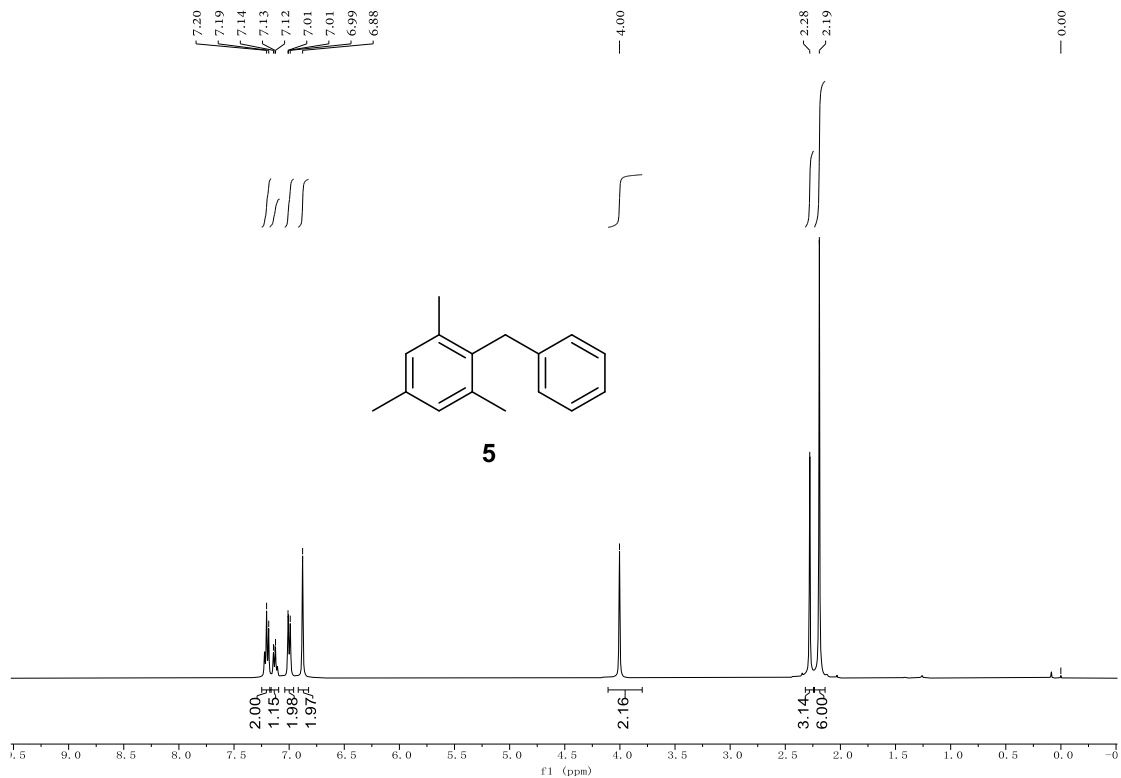

$^{13}\text{C}\{^1\text{H}\}$  NMR, 101 MHz,  $\text{CDCl}_3$

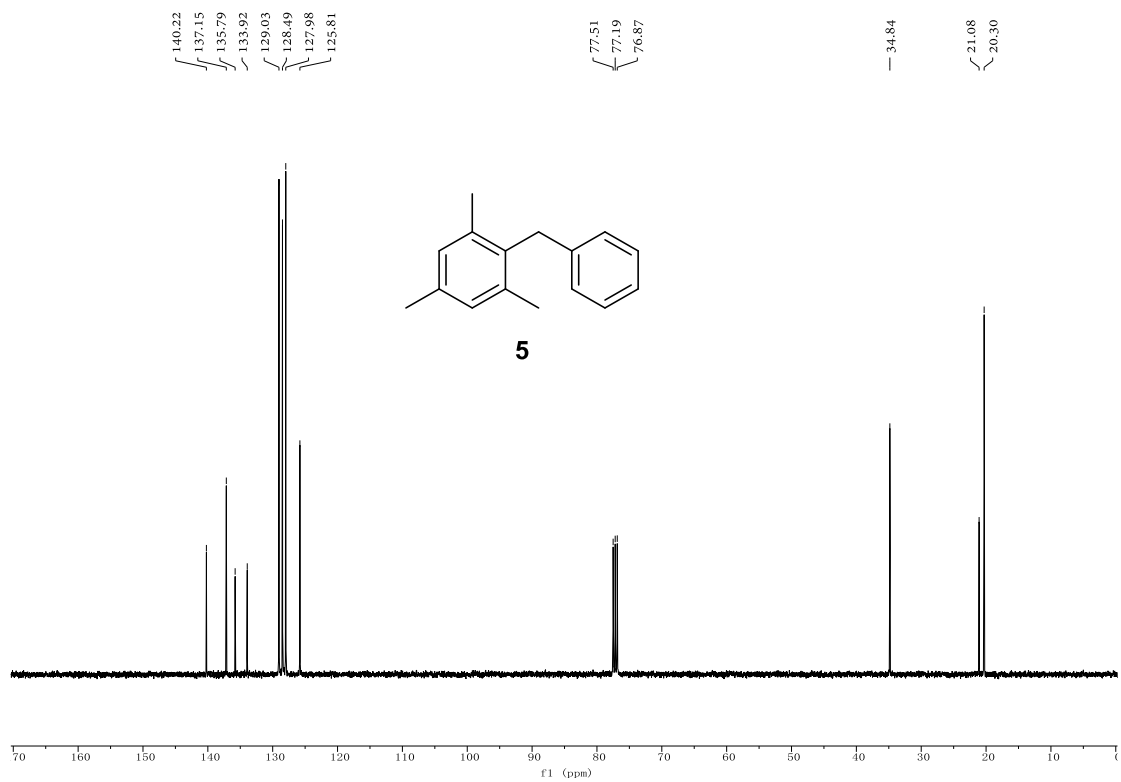

*N,N*-dimethyl-4-(phenylmethyl-*d*)naphthalen-1-amine (**2a-d<sub>1</sub>**)

<sup>1</sup>H NMR, 400 MHz, CDCl<sub>3</sub>

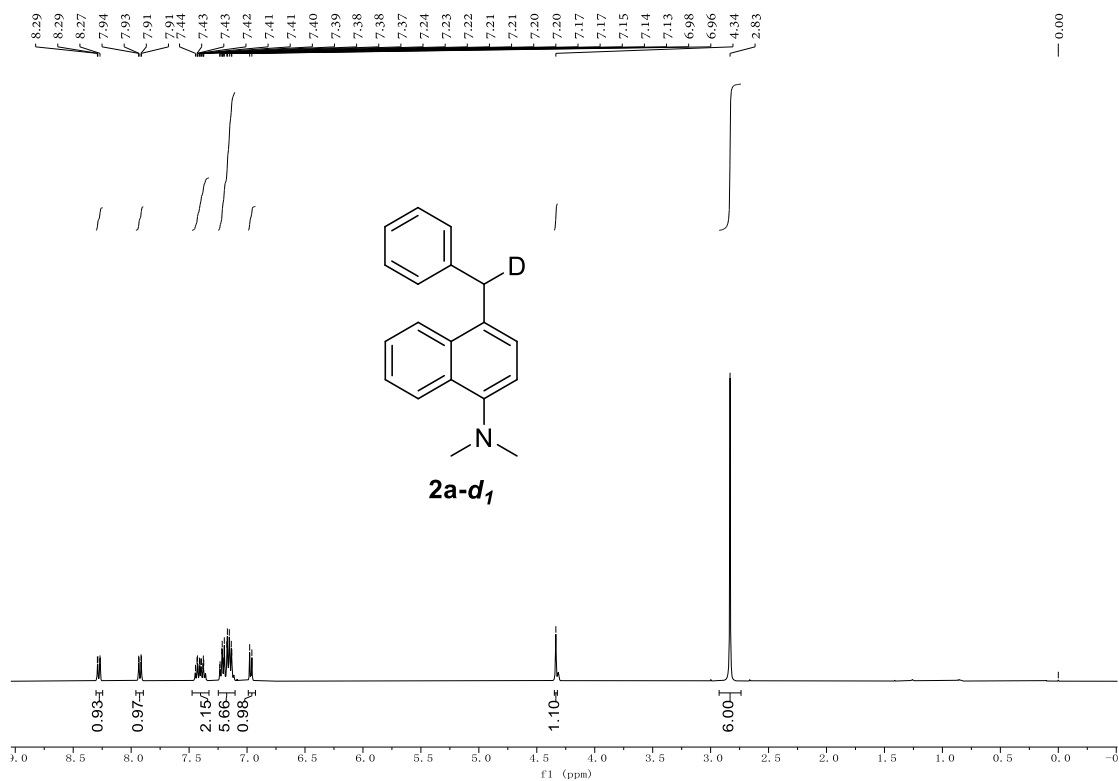

<sup>13</sup>C{<sup>1</sup>H} NMR, 101 MHz, CDCl<sub>3</sub>

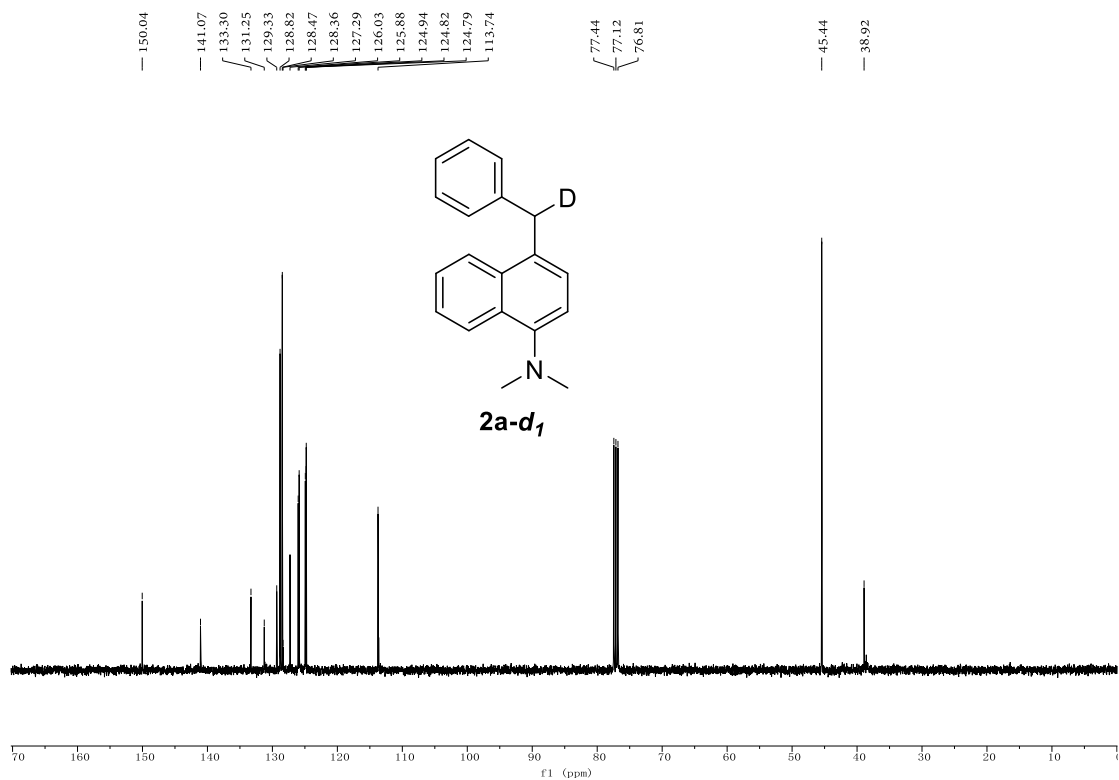

4-benzyl-*N,N*-bis(methyl-*d*<sub>3</sub>)naphthalen-1-amine (**2a-d<sub>6</sub>**)

<sup>1</sup>H NMR, 400 MHz, CDCl<sub>3</sub>

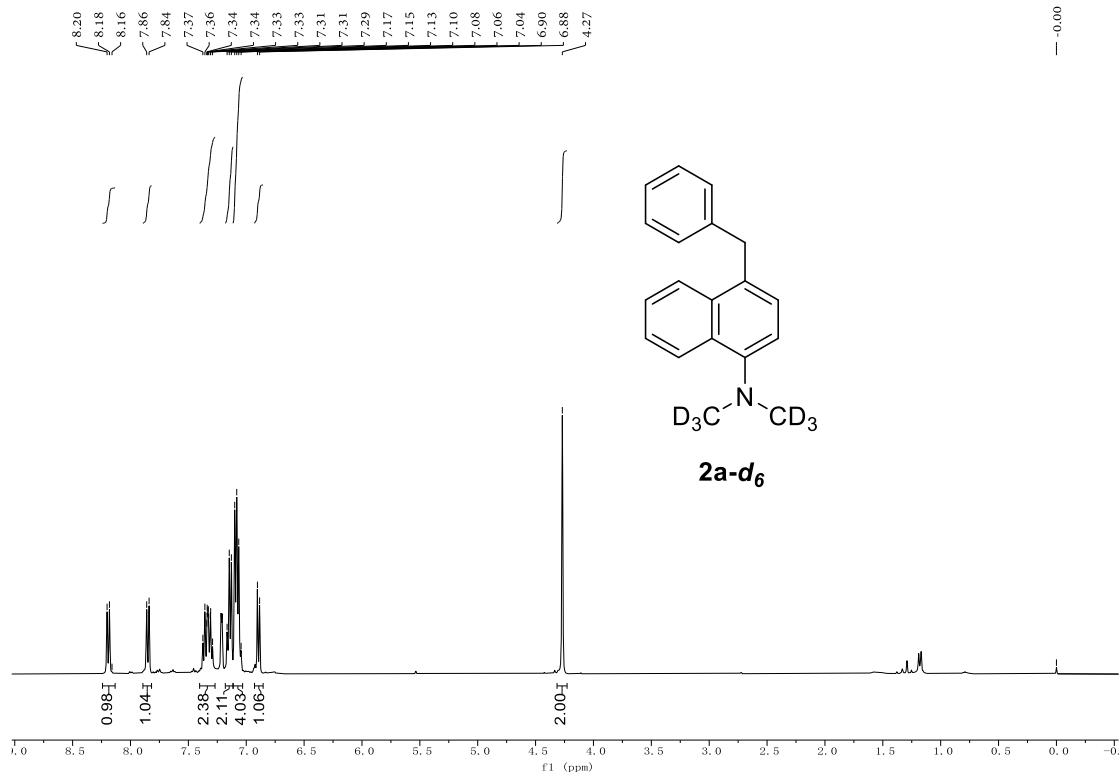

<sup>13</sup>C{<sup>1</sup>H} NMR, 101 MHz, CDCl<sub>3</sub>

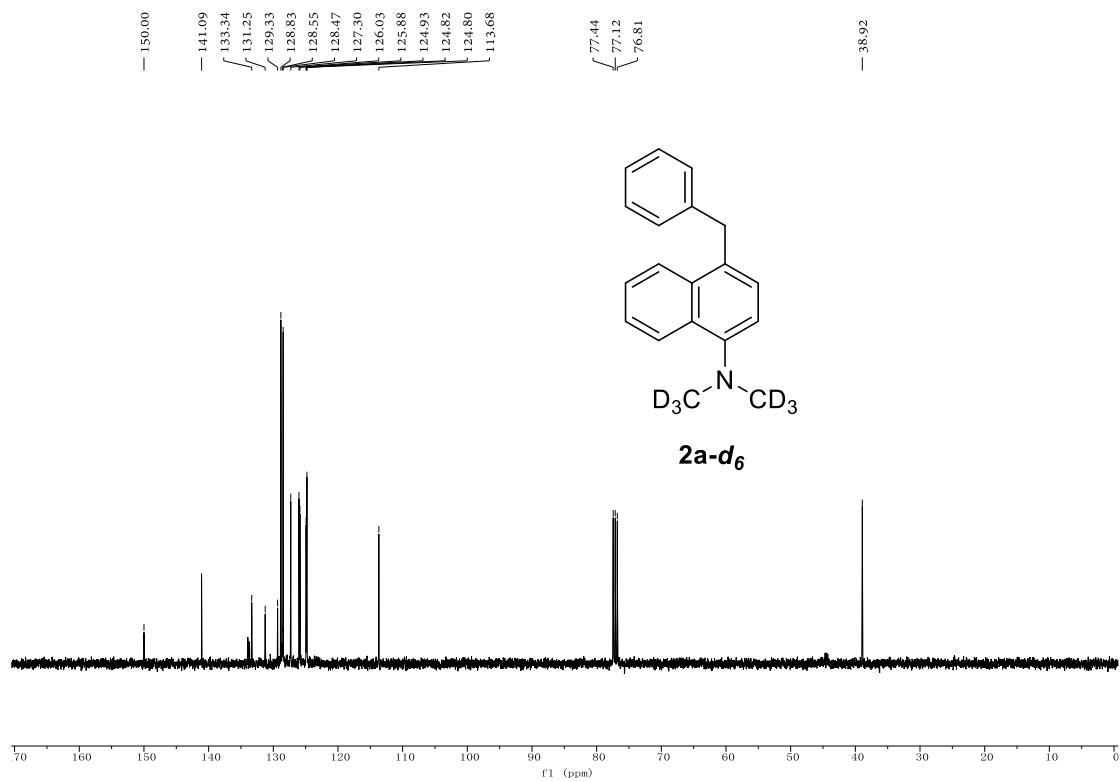

Supplement: d3ob00600j1.pdf [file d3ob00600j1.pdf]
